# Supplementary material for: Effect of Baduanjin exercise on cognitive function in patients with post-stroke cognitive impairment: study protocol for a randomised controlled trial
Source: PubMed Central journal article supplement — BMJ Open. 2018 Jun 22;8(6):e020954. doi: 10.1136/bmjopen-2017-020954 (PMC6020974; doi:10.1136/bmjopen-2017-020954), 2018-06-22
Supplement: bmjopen-2017-020954.draft_revisions.pdf [file bmjopen-2017-020954.draft_revisions.pdf]

# BMJ Open

BMJ Open is committed to open peer review. As part of this commitment we make the peer review history of every article we publish publicly available.

When an article is published we post the peer reviewers' comments and the authors' responses online. We also post the versions of the paper that were used during peer review. These are the versions that the peer review comments apply to.

The versions of the paper that follow are the versions that were submitted during the peer review process. They are not the versions of record or the final published versions. They should not be cited or distributed as the published version of this manuscript.

BMJ Open is an open access journal and the full, final, typeset and author-corrected version of record of the manuscript is available on our site with no access controls, subscription charges or pay-per-view fees (<http://bmjopen.bmj.com>).

If you have any questions on BMJ Open's open peer review process please email [info.bmjopen@bmj.com](mailto:info.bmjopen@bmj.com)

# BMJ Open

## Effect of Baduanjin exercise on cognitive function in patients with post-stroke cognitive impairment: Study protocol for a randomized controlled trial

|                               |                                                                                                                                                                                                                                                                                                                                                                                                                                                                                                                                                                   |
|-------------------------------|-------------------------------------------------------------------------------------------------------------------------------------------------------------------------------------------------------------------------------------------------------------------------------------------------------------------------------------------------------------------------------------------------------------------------------------------------------------------------------------------------------------------------------------------------------------------|
| Journal:                      | <i>BMJ Open</i>                                                                                                                                                                                                                                                                                                                                                                                                                                                                                                                                                   |
| Manuscript ID                 | bmjopen-2017-020954                                                                                                                                                                                                                                                                                                                                                                                                                                                                                                                                               |
| Article Type:                 | Protocol                                                                                                                                                                                                                                                                                                                                                                                                                                                                                                                                                          |
| Date Submitted by the Author: | 06-Dec-2017                                                                                                                                                                                                                                                                                                                                                                                                                                                                                                                                                       |
| Complete List of Authors:     | Zheng, Guohua; Shanghai University of Medicine & Health Sciences, College of Health Information Technology and Management<br>Zheng, Yuhui<br>Xiong, Zhenyu; Fujian University of Traditional Chinese Medicine, College of Rehabilitation Medicine<br>Ye, Bingzhao; Fujian University of Traditional Chinese Medicine, College of Rehabilitation Medicine<br>Tao, Jing; Fujian University of Traditional Chinese Medicine, Department of Physical Education<br>Chen, Lidian; Fujian University of Traditional Chinese Medicine, College of Rehabilitation Medicine |
| Keywords:                     | Baduanjin exercise, cognitive impairment after stroke, randomized controlled trial                                                                                                                                                                                                                                                                                                                                                                                                                                                                                |
|                               |                                                                                                                                                                                                                                                                                                                                                                                                                                                                                                                                                                   |

SCHOLARONE™  
Manuscripts

Only

1  
2  
3 **Effect of Baduanjin exercise on cognitive function in patients with**  
4 **post-stroke cognitive impairment: Study protocol for a randomized**  
5 **controlled trial**  
6  
7

8  
9 Guohua Zheng<sup>1\*</sup>, Yuhui Zheng<sup>2\*</sup>, Zhenyu Xiong<sup>2</sup>, Bingzhao Ye<sup>2</sup>, Jing Tao<sup>2</sup>, Lidian  
10 Chen<sup>3#</sup>  
11

12  
13  
14  
15 Guohua Zheng, Email: zhgh\_1969@aliyun.com

16  
17 College of Health Information Technology and Management, Shanghai University of  
18 Medicine & Health Sciences, Shanghai 201318, China

19  
20  
21 Yuhui Zheng, Email: 761363122@qq.com

22  
23 College of Rehabilitation Medicine, Fujian University of Traditional Chinese  
24 Medicine, Fuzhou 350122, China

25  
26  
27 Zhenyu Xiong, Email: 624548504@qq.com

28  
29 College of Rehabilitation Medicine, Fujian University of Traditional Chinese  
30 Medicine, Fuzhou 350122, China

31  
32  
33 Bingzhao Ye, Email: 949941043@qq.com

34  
35 College of Rehabilitation Medicine, Fujian University of Traditional Chinese  
36 Medicine, Fuzhou 350122, China

37  
38  
39 Jing Tao, Email: taojing01@163.com

40  
41 College of Rehabilitation Medicine, Fujian University of Traditional Chinese  
42 Medicine, Fuzhou 350122, China

43  
44  
45 Lidian Chen, Email: cld@fjtc.edu.cn

46  
47 Fujian Key Laboratory of Rehabilitation Technology, Fujian University of Traditional  
48 Chinese Medicine, Fuzhou 350122, China

49  
50  
51  
52  
53  
54 1. College of Health Information Technology and Management, Shanghai University

1  
2  
3 of Medicine & Health Sciences, Shanghai 201318, China

4  
5 2. College of Rehabilitation Medicine, Fujian University of Traditional Chinese  
6 Medicine, Fuzhou 350122, China

7  
8  
9 3. Fujian Key Laboratory of Rehabilitation Technology, Fujian University of  
10 Traditional Chinese Medicine, Fuzhou 350122, China

11  
12  
13 \*Contributed equally

14  
15 #Corresponding author

16  
17  
18 **Abstract**

19  
20 **Introduction:** Post-stroke cognitive impairment is one of the most common  
21 complications in stroke survivors, and over 65% of these patients suffer from  
22 cognitive impairment at 12 months following onset, which strongly affects the  
23 rehabilitation of their motor function and quality of life. Therefore, it is important to  
24 improve the cognitive ability of stroke survivors. As an important component of  
25 traditional Chinese Qigong exercises, characterized by the coordination of mind and  
26 body with a low exercise intensity, Baduanjin has the potential benefit of improving  
27 cognitive ability for stroke patients with cognitive impairment. The primary purpose  
28 of this study is to investigate the effectiveness and safety of Baduanjin training on the  
29 cognitive function of stroke survivors.  
30  
31  
32  
33  
34  
35  
36  
37  
38  
39  
40  
41  
42

43 **Method and analysis:** This study is designed as a randomized, two-arm parallel  
44 controlled trial with allocation concealment and assessors blinding. A total of 48  
45 participants will be recruited and randomly allocated into the Baduanjin exercise  
46 intervention or control group. Baduanjin intervention will last 24 weeks with a  
47 frequency of 3 days a week and 40 min a day. Global cognitive function and the  
48 specific domains of cognition (i.e., memory, processing speed, execution, attention  
49  
50  
51  
52  
53  
54  
55

1  
2  
3 and visuospatial ability) will be measured at baseline, 8 weeks, 16 weeks, 24 weeks  
4 after intervention and 28 weeks after an additional 4-week follow-up period, while the  
5 motor function and quality of life will be measured at baseline, 24 weeks after  
6 intervention, and 28 weeks after an additional 4-week follow-up period.  
7  
8  
9

10  
11  
12 **Discussion:** This protocol presents a rigorous design of a randomized parallel  
13 controlled trial that aims to evaluate the effectiveness of Baduanjin exercise on  
14 cognitive function, motor function and quality of life in stroke patients with cognitive  
15 impairment. A positive result will provide powerful evidence for Baduanjin exercise  
16 to improve cognitive function, motor function and quality of life in stroke survivors  
17 with cognitive impairment.  
18  
19  
20  
21  
22  
23  
24

25  
26 **Ethics and dissemination:** Ethics approval was obtained from the Ethics Committee  
27 of Fujian University of Traditional Chinese Medicine Subsidiary Rehabilitation  
28 Hospital (approval number: 2016KY-022-01). The findings will be disseminated  
29 through peer-reviewed publications and at scientific conferences.  
30  
31  
32  
33  
34

### 35 **Strengths and limitations of this study**

- 36 ● This protocol presents a rigorous design of a randomized parallel controlled trial  
37 that aims to evaluate the effectiveness of Baduanjin exercise on the cognitive  
38 function, motor function and quality of life in stroke patients with cognitive  
39 impairment.  
40  
41  
42  
43  
44  
45
- 46 ● A broad measurement tool and multiple measurement time points will be used to  
47 judge the effects of Baduanjin exercise on cognitive ability in stroke patients.  
48  
49  
50
- 51 ● If the result we will reach is positive, that will provide a powerful evidence of  
52 Baduanjin exercise on improve cognitive function, motor function and quality of  
53  
54  
55

1  
2  
3 life in stroke survivors with cognitive impairment.

- 4  
5 ● The efficacy of a 24-week Baduanjin exercise intervention in stroke patients with  
6  
7 cognitive impairment remains to be determined.  
8  
9

### 10 **Trial registration**

11  
12  
13 ChiCTR-INR-16009364. Registration date: 10 October, 2016.  
14  
15

16 **Protocol version:** 3.0. Date: 10 October, 2016.  
17

### 18 **Keywords**

19  
20  
21 Baduanjin exercise, cognitive impairment after stroke, randomized controlled trial  
22  
23  
24  
25  
26  
27  
28  
29  
30  
31  
32

### 33 **Background**

34  
35 Stroke affects 15 million people annually and is a leading cause of death and  
36 disability worldwide <sup>[1]</sup>. In China, there are 6 million patients suffering from stroke,  
37 and this number increases at an annual rate of 9%. Stroke is associated with many  
38 long-term complications, such as motor dysfunction, language dysfunction and  
39 cognitive impairment. Post-stroke cognitive impairment is one of most common  
40 complications. Over 65% of stroke survivors suffer from cognitive impairment at 12  
41 months following onset, and a third of them may transform to dementia <sup>[2]</sup>, which  
42 greatly impacts the quality of life of stroke survivors <sup>[3]</sup>. As a consequence, it is  
43 significant to improve the cognitive function as soon as possible to promote functional  
44  
45  
46  
47  
48  
49  
50  
51  
52  
53  
54  
55

1  
2  
3 recovery and improve quality of life in stroke survivors [4].  
4

5  
6 Theoretically, pharmacological therapy for cognition function may lead to  
7 improved recovery. Current data also indicate that a number of drugs may have  
8 short-term benefits [5-7], but no drug treatment to date has shown convincing clinical  
9 evidence on preventing further cognitive decline or restoring cognitive function for  
10 stroke survivors [8]. Thus, increasing attention has been paid to non-drug treatments.  
11  
12 Aerobic exercises have been widely recognized because of their obvious effect of  
13 improving cognitive ability in stroke survivors [9-11]. However, most stroke patients do  
14 not have sufficient compliance to achieve sufficient improvements in aerobic exercise  
15 protocols due to an important concern of safety. Therefore, future stroke studies  
16 involving aerobic exercise training should determine optimal protocols for individuals  
17 with physical limitations [12]. As a mind-body exercise with mild to moderate intensity,  
18 Baduanjin exercise is one of the most common forms of Qigong that has been  
19 practised in China for more than 1000 years [13]. Baduanjin exercise consists of eight  
20 separate and smooth movements and is easier to learn and practice with less limitation  
21 than other aerobic exercises [14]. Therefore, this exercise is more suitable for older  
22 adults, especially stroke patients. Increasing studies have demonstrated that regular  
23 practice of Baduanjin exercise was beneficial to improve the physical and  
24 psychological outcomes in older people, such as improving blood lipid metabolism  
25 and sleep quality, lowering blood pressure, reducing depression and anxiety, and  
26 improving physical flexibility [15-19]. Currently, several studies also show that regular  
27 Baduanjin exercise could slow normal age-related decline in the memory domain, and  
28 delay ageing of intelligence in older adults [20-21]. Consequently, we speculate that  
29 regular Baduanjin exercise could be beneficial for cognitive function in patients with  
30  
31  
32  
33  
34  
35  
36  
37  
38  
39  
40  
41  
42  
43  
44  
45  
46  
47  
48  
49  
50  
51  
52  
53  
54  
55

1  
2  
3 post-stroke cognitive dysfunction. The primary aim of this study is to conduct a  
4  
5 randomized controlled trial to evaluate systematically the effect of Baduanjin exercise  
6  
7 on the cognitive function in stroke patients with cognitive impairment.  
8  
9

## 10 **Method/Design**

11  
12  
13 This report describes a two-arm, randomized, parallel controlled trial with allocation  
14  
15 concealment and assessor blinding. The primary purpose is to evaluate the effect of  
16  
17 Baduanjin on cognitive functions, including global cognitive ability, and primary  
18  
19 cognitive domains, such as memory, attention, and visuospatial ability, in stroke  
20  
21 patients with cognitive impairment.  
22  
23

24  
25 This study will be conducted at the Wufeng Community Centre in the Gulou  
26  
27 District and the Cangxia Community Centre in the Taijiang District, Fuzhou City,  
28  
29 Fujian, China, which are counterpart support communities of the Affiliated  
30  
31 Rehabilitation Hospital of Fujian University of Traditional Chinese Medicine. A total  
32  
33 of 48 eligible participants will be randomly allocated to either the intervention group  
34  
35 (the Baduanjin exercise group) or the control group (the health education group) in a  
36  
37 1:1 ratio. The participants in the intervention group will accept Baduanjin exercise  
38  
39 training intervention three times a week and the routine health education once every  
40  
41 four weeks for 24 weeks, while those allocated to the control group will only receive  
42  
43 the routine health education once every four weeks for 24 weeks. Primary and  
44  
45 secondary outcomes will be measured at baseline, 8 weeks, 16 weeks and 24 weeks  
46  
47 after intervention and at 28 weeks (after an additional 4-week follow-up period). A  
48  
49 flow diagram of the study design is shown in Figure 1. The study protocol is reported  
50  
51 according to Standard Protocol Items: Recommendations for Intervention Trials 2013  
52  
53 (SPIRIT). A SPIRIT Checklist and the schedule of enrolment, interventions and  
54  
55  
56  
57  
58  
59  
60



assessments are provided in Additional file 1 and Figure 2.

### **Sample size**

Sample size was calculated on the basis of the changes in global cognitive ability after 24 weeks of intervention between comparison groups with a significance level of 5% and a two-tailed critical region. The means and their standard deviations (mean  $\pm$  SD) of global cognitive ability in the control and aerobic exercise intervention group were 75.93 $\pm$ 4.9 and 81.07 $\pm$ 6.16, respectively, at post-intervention according to the published literature [22]. A sample size of 40 participants was calculated to ensure the same effect size with 80% power by Gpower 3.1.9.2 software. Considering a 20% attrition rate, a total of 48 participants is necessary, with 24 participants being assigned to each group.

### **Study population**

The study population is stroke patients with a diagnosis of cognitive impairment living in Fuzhou City. The inclusion and exclusion criteria for the study sample are as follows.

### **Inclusion criteria**

The eligible participants should meet all of the following criteria:

- ① Clinical diagnosis of stroke according to the fourth national academic conference on cerebrovascular diseases Diagnostic Criteria for All Kinds of Cerebrovascular Disease [23] and confirmed by computed tomography or magnetic resonance imaging;
- ② Have cognitive impairment diagnosed by Diagnostic and Statistical Manual Disorders (DSM-V);

- 1  
2  
3  First ever stroke over three months;  
4  
5  
6  Aged between 45 and 75 years;  
7  
8  
9  Be conscious, with stable vital signs;  
10  
11  Ability to walk at least 10 metres without external force and auxiliary equipment;  
12  
13  
14  Written informed consent.  
15

### 16 **Exclusion criteria**

17  
18  
19 Criteria for exclusion are the following:  
20

- 21  
22  Have been suffering from brain tumour, brain trauma, brain parasite disease, or  
23 other diseases that could cause cognitive impairment;  
24  
25  
26  
27  Severe language, vision, and/or auditory impairment or a neuropsychiatric disorder  
28 precluding cognitive examination;  
29  
30  
31  
32  Have been suffering from diseases related to cognitive impairment confirmed by  
33 anamnesis, doctors, or families or with a history of cognitive drug use before stroke;  
34  
35  
36  
37  Beck Depression Scale-II score >13;  
38  
39  
40  
41  Patients with alcohol or drug abuse;  
42  
43  
44  Have been suffering from a severe medical condition, such as heart, liver, kidney,  
45 and endocrine diseases and haematopoietic system disease;  
46  
47  
48  Participating in another clinical trial that would affect the evaluation results of this  
49 study.  
50  
51

### 52 **Withdrawal or dropout criteria**

Participants in neither the intervention nor control group will be terminated to continue this trial according to the following criteria:

- ① Unwilling to continue this trial;
- ② Suffering from the deterioration of stroke disease or other serious organic diseases during the study period;
- ③ Do not complete the training scheme for four weeks during the study period;
- ④ Those who reject to be measured or followed up;
- ⑤ Suffering from the serious adverse event related to the research.

### **Recruitment and screening**

The recruitment of eligible participants will be conducted by posting up posters on the community publicity column, sending leaflets, and setting up a recruiting station at the Wufeng Community Centre in the Gulou District and the Cangxia Community Centre in the Taijiang District, Fuzhou City. The potentially eligible individuals will first complete a screening to determine their eligibility according to the inclusion and exclusion criteria. Eligible individuals will receive the information about this trial and have an informed discussion with two trained research assistants regarding the information provided. Those who are interested in this study will sign the written informed consent, and the baseline assessment will subsequently be arranged.

### **Randomization and allocation concealment**

After baseline assessment, the eligible participants will be randomly assigned to either the intervention group or the control group with equal rate. The random allocation sequence will be generated using the PLAN procedure of the statistical software SAS v9.0 and be managed by an independent research assistant who is not involved in

1  
2  
3 recruitment, evaluation and intervention of the participants. The eligible participants  
4  
5 will be informed of their allocation result by the independent research assistant via  
6  
7 telephone.  
8  
9

### 10 **Blinding**

11  
12 In this trial, it is impossible to blind the participants and exercise coaches because this  
13  
14 trial investigates a non-pharmacological intervention, but two types of blind codes  
15  
16 will be used to blind the outcome assessors and data statisticians. We will assign an  
17  
18 independent research manager to be in charge of the random allocation sequence and  
19  
20 the blind codes. The participants' allocation result (the intervention group or the  
21  
22 control group) will be replaced using alphabet 'A' or 'B' in the first blind code, and  
23  
24 the real meaning of 'A' or 'B' will be marked in the second blind code. When the  
25  
26 data-base is locked, the independent research assistant will deliver the group code 'A'  
27  
28 or 'B' of participants to the statistician, and the real meaning of group 'A' or 'B' will  
29  
30 be declared after analysis of all data is completed.  
31  
32  
33  
34

### 35 **Intervention**

36  
37  
38 All participants will continue routine medical or rehabilitative treatment and maintain  
39  
40 usual visits with their primary care physicians throughout the study if necessary.  
41  
42 Meanwhile, all of the participants will also receive the same health education  
43  
44 programme during the intervention period. The Baduanjin exercise will be applied to  
45  
46 the participants in the intervention group, while participants in the control group will  
47  
48 be informed to maintain their usual lifestyle.  
49  
50

51  
52 The routine medical or rehabilitative treatment will be in accordance with the Chinese  
53  
54 Medical Association's Guidelines for the Prevention and Treatment of  
55

1  
2  
3 Cerebrovascular Disease in China (2010) [24]. The detailed treatment schedule will be  
4  
5 conducted by their primary care physicians and recorded by the research assistants.  
6  
7 The health education is conducted by the professional neurologists with a frequency  
8  
9 of once a month and 40 minutes each time. The content of health education primarily  
10  
11 involves the knowledge of the prevention and rehabilitation of stroke according to  
12  
13 “Out of the Misunderstanding of Stroke Patients’ Rehabilitation” (a bestseller book  
14  
15 for health education after stroke from the Chinese Association of TCM) [25].  
16  
17

### 18 **Intervention group**

19  
20  
21 Participants in the intervention group will receive a 24-week Baduanjin exercise  
22  
23 training, except for the routine medical or rehabilitative treatment and health  
24  
25 education. The Baduanjin exercise training will last for 24 weeks with a frequency of  
26  
27 3 days a week and 40 min a day. The training scheme of Baduanjin exercise originates  
28  
29 from the ‘Health Qigong Baduanjin Standard’ enacted by the State Sports General  
30  
31 Administration in 2003 [26]. The whole set of Baduanjin exercise consists of ten  
32  
33 postures (including the preparation and ending posture) (Figure 3). The participants  
34  
35 will be gathered together to train when there are more than five participants recruited  
36  
37 in the same community. Qualified Baduanjin exercise coaches from the Fujian  
38  
39 University of Traditional Chinese Medicine with more than 5 years of teaching  
40  
41 experience will be employed to guide participants’ training.  
42  
43  
44  
45

### 46 **Control group**

47  
48 The participants in the control group will not receive any specific exercise training  
49  
50 from the study scheme. These participants will be requested to maintain their original  
51  
52 habit of lifestyle.  
53  
54  
55

## Follow-up

After the 24-week intervention period, all participants will enter an additional 4-week follow-up period. The participants will resume their original lifestyle during the follow-up period. Telephone follow-up or home visiting will be performed once a week by the research assistants. The information on participants' subjective feeling, medications and daily activity, as well as cognitive and motor function, will be recorded or evaluated.

## Participant retention and adherence

The success of the intervention is strongly dependent on participants' active participation. To motivate participants' active participation, the staff will use several strategies to improve adherence to the intervention program: ① researchers will explain in detail the benefit of practising Baduanjin exercise after participants are randomly allocated into the intervention group; ② coaches will motivate participants' interest for the Baduanjin exercise training when they instruct participants practising the Baduanjin exercise; and ③ the research assistants will remind participants to practice the Baduanjin exercise according to the study scheme by calling them on the phone. In addition, participant who complete the programme successfully will be rewarded with 100 RMB incentive money. Attendance of the Baduanjin exercise training will be recorded and assessed through records of the proportion of training days. Participants will be marked as absent when they do not attend the training session.

To improve participant retention, once a subject is randomized, the research assistants will make every reasonable effort to ensure the subjects stays for the entire study period. In detail, study assistants will ① maintain participants' interests by interview and phone calls; ② provide periodic communications via materials and talks to inform the participants of our acknowledgement of their support; and ③ be as flexible as

possible with the study schedule in resolving time conflicts with participants' life.

## **Outcome Assessment**

### **Primary outcome**

Global cognitive function will be measured using the Montreal Cognitive Assessment scale (MoCA). The MoCA scale is a brief test to evaluate the global cognitive ability by testing attention, naming, visuospatial/executive function, memory, language, visual structure skills, abstraction, calculation, and orientation with a total score of 0-30 (a higher score equals better function). The Chinese version of the MoCA (Beijing version) was revised and is widely used in China with good validity and reliability<sup>[27]</sup>. Primary outcome will be assessed at baseline, 8 weeks, 16 weeks and 24 weeks after intervention and at 28 weeks after a 4-week follow-up period by the neurologists at the Affiliated Rehabilitation Hospital of FJTCM, who will be blinded to the allocation results of participants.

### **Secondary outcomes**

Secondary outcomes involving the specific cognitive domains (i.e., execution, memory, attention, processing speed and visuospatial skill), gait, motor ability, balance ability, activities of daily living and quality of life will be measured at baseline, 24 weeks of intervention and 28 weeks after a 4-week follow-up period by the blinded medical staff or research assistants.

- Executive ability will be assessed using the Trail Making Test (TMT). The TMT consists of two parts, TMT-A and TMT-B: TMT-A requires the participants to sequentially connect 25 encircled numbers on a sheet of paper, while TMT-B requires participants to draw a line alternating between numbers and letters in

1  
2  
3 ascending order between the number and the letter, and the TMT-B/TMT-A is  
4 considered as a valid index of executive ability <sup>[28]</sup>.

- 5  
6  
7  
8 ● Memory will be measured using the Chinese version of the Auditory Verbal Learning  
9 Test (AVLT) <sup>[29]</sup>. AVLT includes three subtests of immediate recall,  
10 short-term-delayed recall and long-term delayed recognition. In the immediate  
11 recall test, subject will be requested to repeat immediately a list of 15 unrelated  
12 words said by the assessor three times; after 15 minutes, subject will be asked to  
13 recall the 15 words, and the correct rate is the score of short-term-delayed recall. In  
14 the long-term delayed recognition test, a subject is given another list of 15 unrelated  
15 words and must recognize the original list of 15 words <sup>[30]</sup>. The Chinese version of  
16 the AVLT has been reported reliable with split-half reliability, internal consistency  
17 and structure validity <sup>[29]</sup>.
- 18  
19  
20 ● Attention will be measured using the Test of Attention Performance (TAP, V.2.3),  
21 which is based on computer-aided neuropsychological tests for assessing the  
22 attentional performance <sup>[31]</sup>. Four of this test's sub-tests, including alertness for  
23 reaction, general attention, Go/No Go and divided selective attention, will be  
24 chosen for this trial.
- 25  
26  
27 ● Processing speed will be measured by the Digit Symbol Coding (DSC), which is a  
28 subtest of the Wechsler Adult Intelligence Scale-Revised China (WAIS-RC) with  
29 nine numbers from 1 to 9 and nine corresponding symbols <sup>[32]</sup>. A subject will be  
30 asked to draw each symbol under its corresponding number within a 90 s time limit,  
31 and the number of correct answers is its scores.
- 32  
33  
34 ● Visuospatial ability will be assessed by the Clock Drawing Task (CDT), which is a  
35 vision-dependent task <sup>[33]</sup>. The participants will be asked to draw a clock reading a



1  
2  
3 specific time (generally 11:10). The correctness in clock drawing will be classified  
4 according to four categories <sup>[34]</sup>.  
5  
6

- 7  
8 ● Gait stability and the interactions between cognitive tasks and gait will be measured  
9 by gait analysis <sup>[35]</sup>. Participants were instructed to walk in two assigned conditions:  
10 free walking as usual and walking as usual with executing a calculation task. The  
11 gait parameters in two conditions will be measured with the America Motion  
12 Analysis gait analysis system, and the numbers of completion and error rates in  
13 calculation tasks will be recorded.  
14  
15
- 16 ● Motor Function will be evaluated using the Fugl-Meyer Assessment scale (FMA),  
17 which is known for its good validity and reliability in evaluating upper and lower  
18 limb function after stroke <sup>[36]</sup>. The FMA consists of 50 items based on a six-stage  
19 recovery process of Brunnstrom's hemiplegia classification, and 66 points of a  
20 possible 100 total score apply to the upper limbs, and the other 34 points are applied  
21 to the lower limbs <sup>[37]</sup>.  
22  
23
- 24 ● Balance Function will be measured by the Berg Balance Scale (BBS), which  
25 consists of a set of 14 tasks to quantitatively assess the static and dynamic balance  
26 abilities <sup>[38]</sup>. The BBS is not only one of the most important measurement scales to  
27 evaluate the balance function of patients after stroke but can also be used as the risk  
28 predictor of accidental fall in stroke patients <sup>[39]</sup>.  
29  
30
- 31 ● Activities of Daily Living (ADL) will be assessed using the Modified Barthel  
32 Index (MBI), which is a widely used standard scale for assessing functional  
33 disability in basic ADL. The MBI contains 10 projects with a total of 100 points,  
34 and the higher the score means the better the daily life self-care ability <sup>[40]</sup>.  
35  
36  
37  
38  
39  
40  
41  
42  
43  
44  
45  
46  
47  
48  
49  
50  
51  
52  
53  
54  
55

1  
2  
3 ● Quality of life will be measured by the Medical Outcomes Study 36-Item  
4 Short-Form Health Survey (SF-36), which is currently the most commonly used in  
5 clinical evaluation of quality of life in the general population and patients. The  
6 SF-36 consists of 36 items to assess eight health concepts, and each of them is  
7 evaluated separately by the normalized scores from 0 to 100, with the higher score  
8 corresponding to better health status<sup>[41]</sup>. The Chinese SF-36 has been demonstrated  
9 to have high reliability and validity in the Chinese population<sup>[42]</sup>.  
10  
11  
12  
13  
14  
15  
16  
17

### 18 **Safety evaluation**

19  
20 Although no adverse events are reported currently regarding Baduanjin exercise, any  
21 unexpected adverse events during the intervention period will be reported to the  
22 research assistants, and causality in relation to the Baduanjin exercise training and the  
23 severity of adverse events will be evaluated. Serious adverse events will be reported  
24 to the ethics committee immediately.  
25  
26  
27  
28  
29  
30  
31  
32

### 33 **Data management and monitoring**

34  
35 Data will be collected by the outcomes assessors using the print-based case report  
36 forms (p-CRFs), and the p-CRFs will later be inputted into the web-based case report  
37 forms (w-CRFs) in an electronic data capture system (EDC) by research assistants.  
38 The research assistants are also responsible for the integrity and accuracy of data  
39 when data are inputted into w-CRFs by means of checking on value ranges, or logical  
40 checks. The EDC system and web servers will be provided to the data management  
41 centre of FJTCM (<http://210.34.74.191/srtp/users/loginlangth.action>) and meet the  
42 available standards for security (the data management centre, which belongs to the  
43 Science and Technology Department of FJTCM, is in charge of the monitoring and  
44 auditing of all research data in FJTCM). Participants' data in w-CRFs will be stored in  
45  
46  
47  
48  
49  
50  
51  
52  
53  
54  
55  
56  
57  
58  
59  
60

1  
2  
3 the EDC system in a separate password-protected location. All documents will be  
4  
5 retained securely for five years after completion of the study.  
6  
7

### 8 **Statistical analysis**

9  
10 Statistical analysis will be performed using SPSS 22.0 (IBM, Chicago, IL, USA)  
11  
12 software package by an independent statistician who is not involved in the outcome  
13  
14 assessment, with a two-sided p value <0.05 being considered to be statistically  
15  
16 significant. Continuous variables will be expressed using mean and its standard error  
17  
18 for normal distributions or median and its interquartile range for non-normal  
19  
20 distributions. Categorical variables will be described as frequencies or percentages.  
21  
22

23  
24 Baseline characteristics between comparison groups will be compared using a t-test or  
25  
26 Mann-Whitney U test for continuous variables and Pearson  $\chi^2$  or Fisher's exact test for  
27  
28 categorical variables.  
29  
30

31 The analysis of primary or secondary outcomes will be based on an intention to treat  
32  
33 (ITT) principle, and the missing data will be imputed using a multiple imputation  
34  
35 method. The group difference between intervention and control group at each time  
36  
37 point (8-week, 16-week, and 24-week after intervention or 4-week follow-up period)  
38  
39 will be analysed using Student's t-test or Mann-Whitney U-test. The linear mixed  
40  
41 model with restricted maximum likelihood will be used to analyse the interaction  
42  
43 effect of Group×Time.  
44  
45

46 Adverse events (AEs) will be analysed using a chi-square test or Fisher's exact test. If  
47  
48 the formal statistical analyses between-groups cannot be performed due to the lack of  
49  
50 power, AEs will be tabulated and summarized using descriptive statistics.  
51  
52  
53

### 54 **Ethics**

1  
2  
3 This study protocol conformed to the Declaration of Helsinki. Ethics approval of this  
4 study protocol, and consent forms were obtained from the Ethics Committee of Fujian  
5 University of Traditional Chinese Medicine Subsidiary Rehabilitation Hospital  
6 (approval number: 2016KY-022-01). The study background and main objective as  
7 well as potential benefits and risks will be fully explained to the participants and their  
8 families. Before participating in the study, participants will sign the informed consent  
9 document prior to participation.  
10  
11  
12  
13  
14  
15  
16

### 17 **Dissemination**

18  
19  
20 The study protocol has been registered and is available on the Chinese Clinical Trial  
21 Registry website (<http://www.chictr.org.cn> with the identifier number ChiCTR-INR-  
22 16009364). Study results will be first informed to each participant and later  
23 disseminated to researchers, healthcare providers, healthcare professionals and the  
24 general public through courses, presentations and the internet, regardless of the  
25 magnitude or direction of effect. The results will also be documented in a published  
26 peer reviewed academic journal.  
27  
28  
29  
30  
31  
32  
33  
34  
35  
36

### 37 **Discussion**

38  
39  
40 As one of the most common forms of Chinese traditional exercises, Baduanjin  
41 exercise consists of eight separate movements, each of which focuses on a different  
42 physical area of the body <sup>[13]</sup>. Compared with other aerobic exercises, Baduanjin  
43 exercise is not only easy to learn but also is less physical and cognitive demanding <sup>[43]</sup>.  
44  
45  
46  
47  
48 Therefore, Baduanjin has become a popular and safe community exercise to promote  
49 health in the community of the older population of China. Furthermore, different from  
50 other types of aerobic exercise, Baduanjin is also a mind-body exercise combined  
51  
52  
53  
54  
55

1  
2  
3 with the holistic view and the theory of traditional Chinese medicine in that  
4 practitioners are required to reach coordination between mind and body <sup>[14]</sup>. Several  
5 studies have reported that regular Baduanjin training has a positive effect in slowing  
6 normal age-related memory decline <sup>[20-21]</sup>. Zhu HM et al. even reported that Baduanjin  
7 exercise can delay the cognitive impairment progression for the elderly diabetic  
8 patients with mild cognitive impairment <sup>[44]</sup>. Therefore, it is reasonable to assume that  
9 regular Baduanjin training could be beneficial to cognitive function in stroke patients.  
10 This proposed study aims to investigate the effect of Baduanjin exercise on cognitive  
11 function, as well as observing the effect on motor function and quality of life in the  
12 stroke patients with cognitive impairment. This study will employ rigorousness to  
13 control bias, such as randomization, parallel control, and blinding of the outcome  
14 assessors and statistician. To ensure participants master standard Baduanjin  
15 movements, we will also employ qualified physical exercise teachers to serve as the  
16 Baduanjin exercise coaches. However, a potential limitation of this study is that  
17 participants and coaches cannot be blinded because it is impossible to make them  
18 blinded in non-pharmacological trials <sup>[45]</sup>. Therefore, performance bias may be  
19 inevitable, but the exercise coaches will be not involved in the recruitment, outcome  
20 assessment, or data analysis of this study. Another challenge that we may encounter  
21 for the study is the difficulty in recruiting the eligible stroke patients. Those stroke  
22 patients or their families may worry about the exercise risk and prefer to stay in their  
23 home and maintain a fairly static life. In addition, a higher dropout rate may also be  
24 expected due to the above concerns. To address these problems, we will encourage  
25 participants to practice the Baduanjin training at their home after they master this  
26 exercise. We also accounted for the higher dropout rate in the sample size estimation  
27 to ensure the sufficient statistical power for the study.

1  
2  
3 In summary, this report describes the first randomized controlled trial to evaluate  
4 systematically the rehabilitative effect of Baduanjin exercise on cognitive ability and  
5 motor function in stroke patients. This study will determine if Baduanjin training is  
6 likely to be effective in improving cognitive function, including global cognitive  
7 function and specific cognitive domains, in stroke patients with cognitive impairment.  
8 This study will also investigate if Baduanjin training can improve the motor function  
9 and quality of life for stroke patients with cognitive impairment and determine if this  
10 exercise is acceptable to them. If this trial is successfully conducted and demonstrates  
11 a significant result, that intervention would provide an effective rehabilitation  
12 approach for stroke patients and adequate supporting evidence for the application of  
13 regular Baduanjin exercise in patients with post-stroke cognitive impairment.  
14 Conversely, if this exercise training is not effective, the study will identify the factors  
15 that contributed to the negative outcome.  
16  
17  
18  
19  
20  
21  
22  
23  
24  
25  
26  
27  
28  
29  
30  
31  
32  
33

### 34 **Trial status**

35  
36  
37 This trial is currently in the recruitment phase.  
38  
39  
40  
41  
42

### 43 **Abbreviations**

44  
45  
46 SD: Standard deviation; DSM-V: Diagnostic and statistical manual disorders, 5th  
47 edition; SAS 9.0: Statistical analysis system; TCM: Traditional Chinese medicine;  
48 MoCA: Montreal cognitive assessment scale; FJTCM: Fujian University of  
49 Traditional Chinese Medicine; TMT: Trail Making Test; AVLT: Auditory verbal  
50  
51  
52  
53  
54  
55

1  
2  
3 learning test; TAP: Test of attention performance; DSC: Digit symbol coding;  
4  
5  
6 WAIS-RC: Wechsler adult intelligence scale-revised China; CDT: Clock drawing task;  
7  
8  
9 FMA: Fugl-Meyer assessment scale; BBS: Berg balance scale; BI: Barthel index;  
10  
11 ADL: Activities of daily living; SF-36: Item short-form health survey; CRF: Case  
12  
13 report form; EDC: Electronic data capture system; SPSS 22.0: Statistic package for  
14  
15 social science 22.0; ITT: Intention to treat.  
16  
17  
18  
19  
20

## 21 **Declarations**

### 22 **Authors' contributions**

23  
24  
25  
26  
27 CLD and ZGH conceived and designed of the study protocol and contributed to  
28  
29 drafting the manuscript. ZYH and XZY wrote the manuscript and participated in the  
30  
31 coordination and implementation of the study. ZGH revised the study protocol and  
32  
33 wrote several sections of the manuscript. YBZ and TJ helped develop the study  
34  
35 measures and data collection. All authors contributed to drafting the manuscript and  
36  
37 have read and approved the final version of the manuscript.  
38  
39

### 40 **Funding**

41  
42  
43 This study is financially supported by the Shanghai Municipal Commission of Health  
44  
45 and Family Planning (No. 201640127) and the Specialized Research Fund for the Key  
46  
47 Disciplines of Fujian University of Traditional Chinese Medicine  
48  
49 (X2014070-Disciplines).  
50  
51

### 52 **Availability of data and materials**

1  
2  
3 This is not applicable because this is a paper of a study protocol.  
4

5  
6 **Consent for publication**  
7

8 Not applicable.  
9

10  
11 **Competing interests**  
12

13  
14 None declared.  
15

16  
17 **Reference:**  
18

- 19  
20 1. Feigin VL, Forouzanfar MH, Krishnamurthi R, Mensah GA, Connor M, Bennett  
21 DA, et al. Global and regional burden of stroke during 1990 – 2010: findings from the  
22 Global Burden of Disease Study 2010. *Lancet*. 2014; 383: 245-54.  
23  
24  
25  
26  
27  
28 2. Jin YP, Legge SD, Ostbye T, Feightner JW, Hachinski V. The reciprocal risks of  
29 stroke and cognitive impairment in an elderly population. *Alzheimers Dement*.  
30 2006;2:171-8.  
31  
32  
33  
34  
35  
36 3. Geusgens CA, van Heugten CM, Cooijmans JP, Jolles J, van den Heuvel WJ.  
37 Transfer effects of a cognitive strategy training for stroke patients with apraxia. *J Clin*  
38 *Exp Neuropsychol*. 2007;29:831-41.  
39  
40  
41  
42  
43  
44 4. Cumming TB, Brodtmann A, Darby D, Bernhardt J. The importance of cognition to  
45 quality of life after stroke. *J Psychosom Res*. 2014;77:374-9.  
46  
47  
48  
49 5. Kavirajan H, Schneider LS. Efficacy and adverse effects of cholinesterase  
50 inhibitors and memantine in vascular dementia: A meta-analysis of randomised  
51 controlled trials. *Lancet Neurol*. 2007;6:782-92.  
52  
53  
54  
55



- 1  
2  
3  
4  
5  
6  
7  
8  
9  
10  
11  
12  
13  
14  
15  
16  
17  
18  
19  
20  
21  
22  
23  
24  
25  
26  
27  
28  
29  
30  
31  
32  
33  
34  
35  
36  
37  
38  
39  
40  
41  
42  
43  
44  
45  
46  
47  
48  
49  
50  
51  
52  
53  
54  
55  
56  
57  
58  
59  
60
6. Jiao L, Zhang J, Li Z, Liu H, Chen Y, Xu S. Edaravone alleviates delayed neuronal death and long-dated cognitive dysfunction of hippocampus after transient focal ischemia in Wistar rat brains. *Neuroscience*. 2011;182:177-83.
7. Tomassoni D, Lanari A, Silvestrelli G, Traini E, Amenta F. Nimodipine and its use in cerebrovascular disease. Evidence from recent preclinical and controlled clinical studies. *Clin Exp Hypertens*. 2008;30:744-766.
8. Gillespie DC, Bowen A, Chung CS, Cockburn J, Knapp P, Pollock A. Rehabilitation for post-stroke cognitive impairment: An overview of recommendations arising from systematic reviews of current evidence. *Clin Rehabil*. 2015;29:120-8.
9. Quaney BM, Boyd LA, Mcdowd JM, Zahner LH, He J, Mayo MS, et al. Aerobic exercise improves cognition and motor function poststroke. *Neurorehabil Neural Repair*. 2009;23:879-85.
10. Moore SA, Hallsworth K, Jakovljevic DG, Blamire AM, He J, Ford GA, et al. Effects of community exercise therapy on metabolic, brain, physical, and cognitive function following stroke: A randomized controlled pilot trial. *Neurorehabil Neural Repair*. 2015;29:623-35.
11. Chin LM, Keyser RE, Dsurney J, Chan L. Improved cognitive performance following aerobic exercise training in people with traumatic brain injury. *Arch Phys Med Rehabil*. 2015;96:754-9.

12. Tiozzo E, Youbi M, Dave K, Perez-Pinzon M, Rundek T, Sacco RL, et al. Aerobic, resistance, and cognitive exercise training poststroke. *Stroke*. 2015;46:2012-6.
13. Koh TC. Baduanjin -- an ancient Chinese exercise. *Am J Chin Med*. 1982;10:14-21.
14. Li R, Jin L, Hong P, He ZH, Huang CY, Zhao JX, et al. The effect of baduanjin on promoting the physical fitness and health of adults. *Evid Based Complement Alternat Med*. 2014;doi:10.1155/2014/784059.
15. Mei L, Chen Q, Ge L, Zheng G, Chen J. Systematic review of chinese traditional exercise baduanjin modulating the blood lipid metabolism. *Evid Based Complement Alternat Med*. 2012;doi:10.1155/2012/282131.
16. Xiao CM, Zhuang YC. Effect of health Baduanjin Qigong for mild to moderate Parkinson's disease. *Geriatr Gerontol Int*. 2015;16:911-9.
17. Liu HF, Hai-Yan AN, Wang CH. Psychological effects of Health Qigong Ba Duan Jin. *Journal of Wuhan Institute of Physical Education*. 2008;42:54-7.
18. Xiong X, Wang P, Li S, Zhang Y, Li X. Effect of Baduanjin exercise for hypertension: A systematic review and meta-analysis of randomized controlled trials. *Maturitas*. 2015;80:370-8.
19. Cheng FK. Effects of Baduanjin on mental health: A comprehensive review. *J Bodyw Mov Ther*. 2015;19:138-49.
20. Wang ST. Effect of Baduanjin on physiological age of intelligence for old people.

- 1  
2  
3  
4 Journal of Clinical Rehabilitative Tissue Engineering Research. 2007;11:7910-3.  
5  
6  
7 21. Ge S, Anli W. The influences of two different exercise means on the intellectual  
8  
9 physiological age of the male elderly people. Journal of Beijing Sport University.  
10  
11 2008;31:1093-5.  
12  
13  
14 22. Eltamawy MS, Abdallah F, Ahmed SM, Darwish MH, Khalifa HA. Aerobic  
15  
16 exercises enhance cognitive functions and brain derived neurotrophic factor in  
17  
18 ischemic stroke patients. Neuro Rehabilitation. 2014;34:209-13.  
19  
20  
21  
22 23. The Fourth Academic Seminar of the Chinese Society for Neuroscience. Major  
23  
24 diagnostic points of cerebrovascular disease. Chin J Neurol. 1996; 29:379 - 80.  
25  
26  
27  
28 24. Mi R. Guidelines of Cerebrovascular Disease Prevention and Treatment in China.  
29  
30 Beijing: People' s Medical Publishing House. 2010.  
31  
32  
33 25. Ld C. Out of the Misunderstanding of Stroke Patients' Rehabilitation. Beijing:  
34  
35 People' s Medical Publishing House. 2008.  
36  
37  
38  
39 26. Health Qigong Management Center of General Administration of Sport of China:  
40  
41 Health Qigong-Baduanjin. Beijing: People' s Sports Publishing House of China. 2003.  
42  
43  
44 27. Yusupu N, Yi Z. An introduction of Montreal Cognitive Assessment (MoCA) and  
45  
46 a comparison among its versions. J Neurosci Mental Health. 2010;10:516-9.  
47  
48  
49  
50 28. Arbuthnott K, Frank J. Trail making test, part b as a measure of executive control:  
51  
52 Validation using a Set-Switching paradigm. J Clin Exp Neuropsychol.  
53  
54 2000;22:518-28.  
55

- 1  
2  
3  
4 29. Guo QH, Sun YM, Pei-Min YU, Hong Z. Norm of auditory verbal learning test in  
5  
6 the normal aged in china community. Chinese Journal of Clinical Psychology.  
7  
8 2007;15:132-4.  
9  
10  
11 30. Xie DD, Cheng HD, Yin CL, Lü XY, Wang K. Neuropsychological study of false  
12  
13 memory in patients with amnesia mild cognitive impairment. Zhonghua Yi Xue Za  
14  
15 Zhi. 2011;91:155-9.  
16  
17  
18  
19 31. Test of Attentional Performance (TAP, Version 2.3). Psytest. <http://www.psytest.net>.  
20  
21 accessed 13 Oct 2015.  
22  
23  
24  
25 32. Yaoxian G. The revision of Wechsler adult intelligence scale. Act Psychological  
26  
27 Sinicae. 1983;15:362-70.  
28  
29  
30  
31 33. Agrell B, Dehlin O. The clock-drawing test. 1998. Age Ageing. 2012;41Suppl  
32  
33 3:iii41-5.  
34  
35  
36 34. Shulman KI. Clock-drawing: Is it the ideal cognitive screening test?. Int J Geriatr  
37  
38 Psychiatry. 2000;15:548-61.  
39  
40  
41  
42 35. Plummer P, Villalobos RM, Vayda MS, Moser M, Johnson E. Feasibility of  
43  
44 Dual-Task gait training for Community-Dwelling adults after stroke: A case series.  
45  
46 Stroke Res Treat. 2014;doi: 10.1155/2014/538602.  
47  
48  
49  
50 36. Sullivan KJ, Tilson JK, Cen SY, Rose DK, Hershberg J, Correa A, et al.  
51  
52 Fugl-Meyer assessment of sensorimotor function after stroke: Standardized training  
53  
54 procedure for clinical practice and clinical trials. Stroke. 2011;42:427-32.  
55  
56  
57  
58  
59  
60

- 1  
2  
3 37. Kakuda W, Abo M, Shimizu M, Sasanuma J, Okamoto T, Yokoi A, et al. A  
4 multi-center study on low-frequency rTMS combined with intensive occupational  
5 therapy for upper limb hemiparesis in post-stroke patients. *J Neuroeng Rehabil*.  
6 2012;doi: 10.1186/1743-0003-9-4.  
7  
8  
9  
10  
11  
12  
13 38. Blum L, Kornerbitensky N. Usefulness of the Berg Balance Scale in stroke  
14 rehabilitation: A systematic review. *Phys Ther* 2008;88:559-66.  
15  
16  
17  
18  
19 39. Ursin MH, Bergland A, Fure B, Tørstad A, Tveit A, Ihlehansen H. Balance and  
20 mobility as predictors of Post-Stroke cognitive impairment. *Dement Geriatr Cogn Dis*  
21 *Extra*. 2015;5:203-11.  
22  
23  
24  
25  
26  
27 40. Duffy L, Gajree S, Langhorne P, Stott DJ, Quinn TJ. Reliability (inter-rater  
28 agreement) of the Barthel Index for assessment of stroke survivors: Systematic review  
29 and meta-analysis. *Stroke*. 2013;44:462-8.  
30  
31  
32  
33  
34  
35 41. Jr WJ, Sherbourne CD. The MOS 36-item short-form health survey (SF-36). I.  
36 Conceptual framework and item selection. *Medical Care*. 1992;30:473-83.  
37  
38  
39  
40  
41 42. Jin WZ, Yu HT. A study of the reliability and validity of SF-36 scale on  
42 evaluating health of population. *Chin Health Resour*. 2012;15:265-7.  
43  
44  
45  
46 43. Zhou XQ, Zeng YG, Yang BL, Wang AL. Effects of health qigong and baduanjin  
47 on the middle and old aged people's blood lipid. *Journal of Beijing Sport*  
48 *University* .2007;30:795-7.  
49  
50  
51  
52  
53  
54 44. Zhu HM, Zhang N, Ji C. Influence of Baduanjin on mild cognitive impairment in  
55

1  
2  
3 elderly diabetic patients. Chin J Prac Nurs. 2015;31(16):1202-5.  
4  
5

6  
7 45. Boutron I, Moher D, Altman DG, Schulz KF, Ravaud P. Extending the CONSORT  
8  
9 statement to randomized trials of nonpharmacologic treatment: Explanation and  
10  
11 elaboration. Ann Intern Med. 2008;148:295-309.  
12  
13

14  
15  
16 **Additional files:**  
17

18  
19 Additional file 1: SPIRIT 2013 Checklist: Recommended items to address in a clinical  
20  
21 trial protocol and related documents.  
22  
23

24 Additional figure 1: Study design.  
25  
26

27 Additional figure 2: Schedule of enrolment, interventions, and assessments.  
28  
29

30 Additional figure 3: Ten postures of Baduanjin.  
31  
32  
33  
34  
35  
36  
37  
38  
39  
40  
41  
42  
43  
44  
45  
46  
47  
48  
49  
50  
51  
52  
53  
54  
55  
56  
57  
58  
59  
60

1  
2  
3  
4  
5  
6  
7  
8  
9  
10  
11  
12  
13  
14  
15  
16  
17  
18  
19  
20  
21  
22  
23  
24  
25  
26  
27  
28  
29  
30  
31  
32  
33  
34  
35  
36  
37  
38  
39  
40  
41  
42  
43  
44  
45  
46  
47  
48  
49  
50  
51  
52  
53  
54  
55  
56  
57  
58  
59  
60

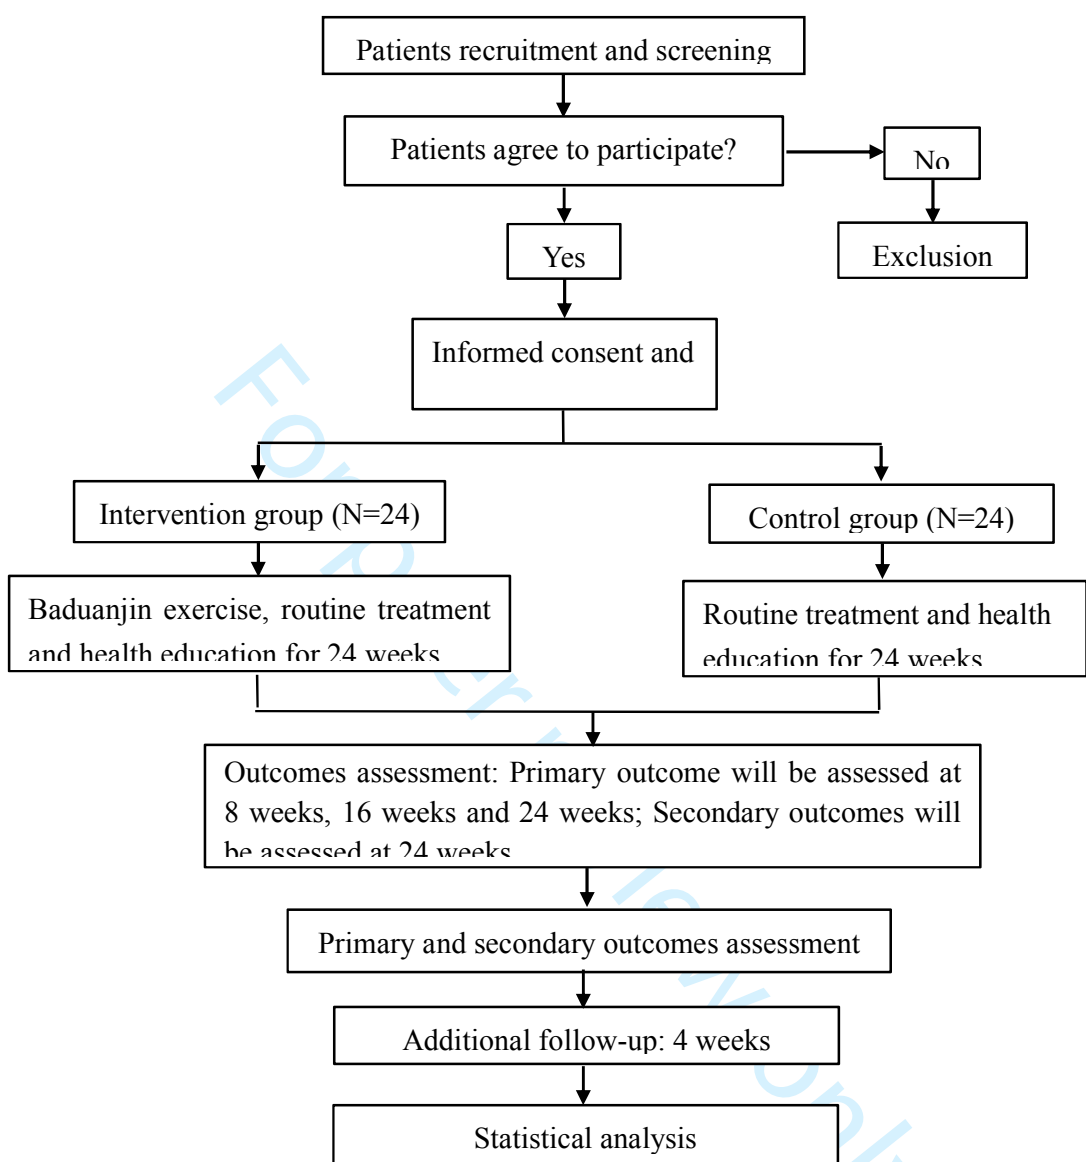

1  
2  
3  
4  
5  
6  
7  
8  
9  
10  
11  
12  
13  
14  
15  
16  
17  
18  
19  
20  
21  
22  
23  
24  
25  
26  
27  
28  
29  
30  
31  
32  
33  
34  
35  
36  
37  
38  
39  
40  
41  
42  
43  
44  
45  
46  
47  
48  
49  
50  
51  
52  
53  
54  
55  
56  
57  
58  
59  
60

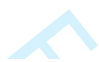

**Figure 1 Flow diagram of study design**

Peer review only



| STUDY PERIOD                                                         |           |            |              |       |       |           |
|----------------------------------------------------------------------|-----------|------------|--------------|-------|-------|-----------|
|                                                                      | Enrolment | Allocation | Intervention |       |       | Follow-up |
| TIMEPOINT*                                                           | $-t_1$    | 0          | $t_1$        | $t_2$ | $t_3$ | $t_4$     |
| <b>ENROLMENT:</b>                                                    |           |            |              |       |       |           |
| Eligibility screen                                                   | X         |            |              |       |       |           |
| Informed consent                                                     | X         |            |              |       |       |           |
| <b>ALLOCATION</b>                                                    |           | X          |              |       |       |           |
| <b>INTERVENTIONS:</b>                                                |           |            |              |       |       |           |
| Intervention group<br>(Baduanjin exercise training+health education) |           |            | ←————→       |       |       |           |
| Control group<br>(Health education)                                  |           |            | ←————→       |       |       |           |
| <b>ASSESSMENTS:</b>                                                  |           |            |              |       |       |           |
| Basic characteristics                                                | X         |            |              |       |       |           |
| Global cognitive function                                            | X         |            | X            | X     | X     | X         |
| Executive ability                                                    | X         |            | X            | X     | X     | X         |
| Memory                                                               | X         |            | X            | X     | X     | X         |
| Attention                                                            | X         |            | X            | X     | X     | X         |
| Processing speed                                                     | X         |            | X            | X     | X     | X         |
| Visuospatial ability                                                 | X         |            | X            | X     | X     | X         |
| Gait stability                                                       | X         |            |              |       | X     | X         |
| Motor Function                                                       | X         |            |              |       | X     | X         |
| Balance Function                                                     | X         |            |              |       | X     | X         |
| Activities of Daily Living                                           | X         |            |              |       | X     | X         |
| Quality of Life                                                      | X         |            |              |       | X     | X         |
| Adverse events                                                       |           |            | X            | X     | X     |           |

**<Figure Legend>**

\*  $-t_1 = -2(-1)$  weeks, 0= Baseline,  $t_1 =$  Week 8,  $t_2 =$  Week 16,  $t_3 =$  End of treatment Week 24,  $t_4 =$  Follow Up Week 28.

**Figure 2: Schedule of enrolment, interventions, and assessments**

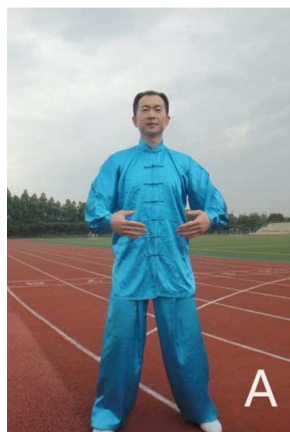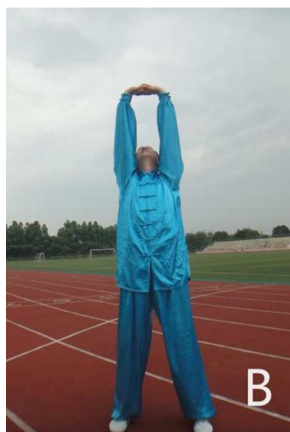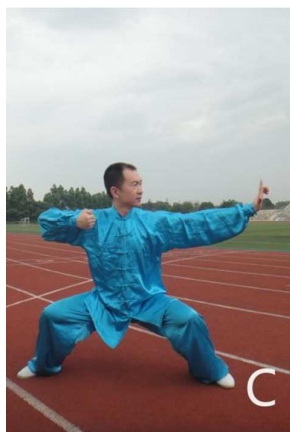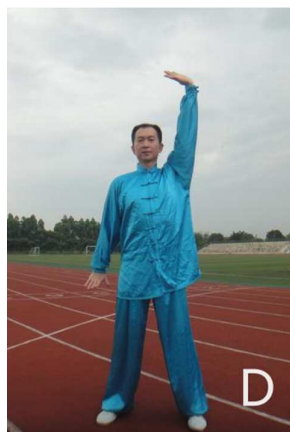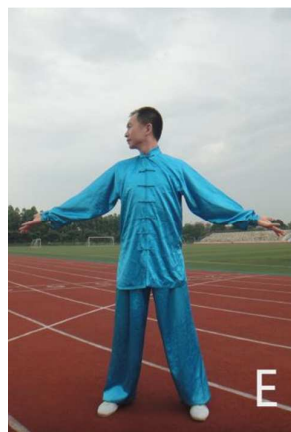

A: Preparation posture

B: Prop up the sky by two hands to regulate

C: Draw a bow on both sides like shooting a

D: Raise single arm up to regulate spleen (Pi) and stomach (Wei)

E: Look back to treat five strains and seven

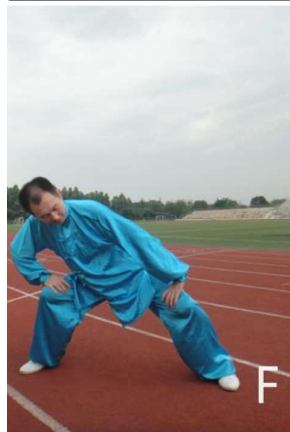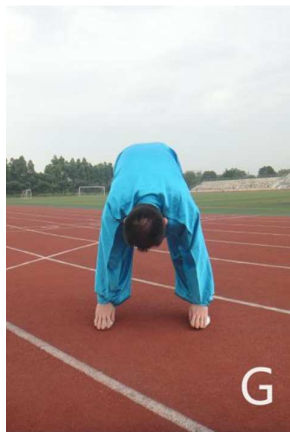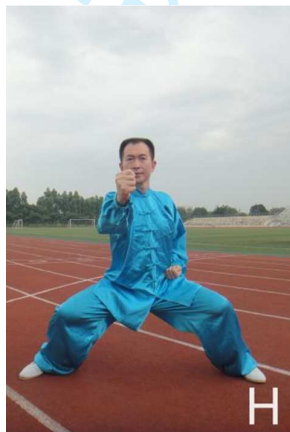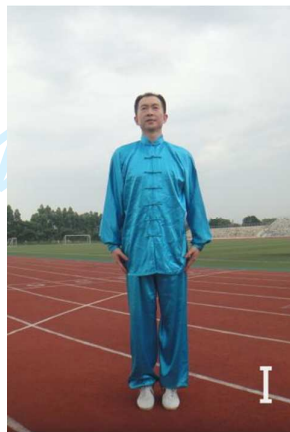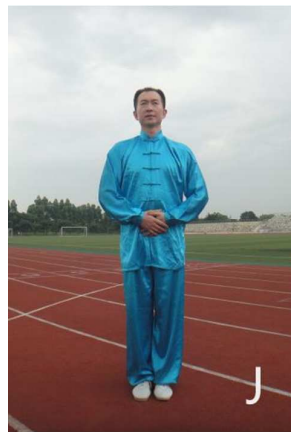

F: Look back to treat five strains and seven

G: Pull toes with both hands to reinforce the

H: Clench one's fist and glare to increase

I: Rise and fall on tiptoe seven times to

J: Ending posture

1  
2  
3  
4  
5  
6  
7  
8  
9  
10  
11  
12  
13  
14  
15  
16  
17  
18  
19  
20  
21  
22  
23  
24  
25  
26  
27  
28  
29  
30  
31  
32  
33  
34  
35  
36  
37  
38  
39  
40  
41  
42  
43  
44  
45  
46  
47

**Figure 2: Ten postures of Baduanjin**

For peer review only

1  
2  
3  
4  
5  
6  
7  
8  
9  
10  
11  
12  
13  
14  
15  
16  
17  
18  
19  
20  
21  
22  
23  
24  
25  
26  
27  
28  
29  
30  
31  
32  
33  
34  
35  
36  
37  
38  
39  
40  
41  
42  
43  
44  
45  
46  
47

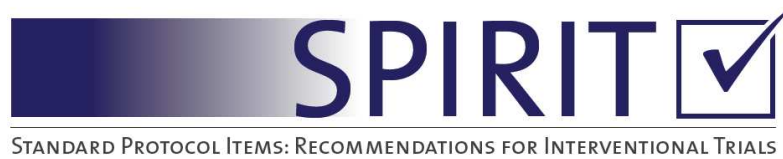

## SPIRIT 2013 Checklist: Recommended items to address in a clinical trial protocol and related documents\*

| Section/item                                              | Item No | Description                                                                                                                                                                                                                                                                              | Addressed on page number |
|-----------------------------------------------------------|---------|------------------------------------------------------------------------------------------------------------------------------------------------------------------------------------------------------------------------------------------------------------------------------------------|--------------------------|
| <b>Administrative information</b>                         |         |                                                                                                                                                                                                                                                                                          |                          |
| Title                                                     | 1       | Descriptive title identifying the study design, population, interventions, and, if applicable, trial acronym                                                                                                                                                                             | 1                        |
| Trial registration                                        | 2a      | Trial identifier and registry name. If not yet registered, name of intended registry                                                                                                                                                                                                     | 4                        |
|                                                           | 2b      | All items from the World Health Organization Trial Registration Data Set                                                                                                                                                                                                                 | 4                        |
| Protocol version                                          | 3       | Date and version identifier                                                                                                                                                                                                                                                              | 4                        |
| Funding                                                   | 4       | Sources and types of financial, material, and other support                                                                                                                                                                                                                              | 21                       |
| Roles and responsibilities                                | 5a      | Names, affiliations, and roles of protocol contributors                                                                                                                                                                                                                                  | 1 & 21                   |
|                                                           | 5b      | Name and contact information for the trial sponsor                                                                                                                                                                                                                                       | 21                       |
|                                                           | 5c      | Role of study sponsor and funders, if any, in study design; collection, management, analysis, and interpretation of data; writing of the report; and the decision to submit the report for publication, including whether they will have ultimate authority over any of these activities | 21                       |
|                                                           | 5d      | Composition, roles, and responsibilities of the coordinating centre, steering committee, endpoint adjudication committee, data management team, and other individuals or groups overseeing the trial, if applicable (see Item 21a for data monitoring committee)                         | 18                       |
| <b>Introduction</b>                                       |         |                                                                                                                                                                                                                                                                                          |                          |
| Background and rationale                                  | 6a      | Description of research question and justification for undertaking the trial, including summary of relevant studies (published and unpublished) examining benefits and harms for each intervention                                                                                       | 4-6                      |
|                                                           | 6b      | Explanation for choice of comparators                                                                                                                                                                                                                                                    | 11                       |
| Objectives                                                | 7       | Specific objectives or hypotheses                                                                                                                                                                                                                                                        | 6                        |
| Trial design                                              | 8       | Description of trial design including type of trial (eg, parallel group, crossover, factorial, single group), allocation ratio, and framework (eg, superiority, equivalence, noninferiority, exploratory)                                                                                | 6                        |
| <b>Methods: Participants, interventions, and outcomes</b> |         |                                                                                                                                                                                                                                                                                          |                          |

|    |                                                                     |     |                                                                                                                                                                                                                                                                                                                                                                                |         |
|----|---------------------------------------------------------------------|-----|--------------------------------------------------------------------------------------------------------------------------------------------------------------------------------------------------------------------------------------------------------------------------------------------------------------------------------------------------------------------------------|---------|
| 1  | Study setting                                                       | 9   | Description of study settings (eg, community clinic, academic hospital) and list of countries where data will be collected. Reference to where list of study sites can be obtained                                                                                                                                                                                             | 8       |
| 2  |                                                                     |     |                                                                                                                                                                                                                                                                                                                                                                                |         |
| 3  |                                                                     |     |                                                                                                                                                                                                                                                                                                                                                                                |         |
| 4  | Eligibility criteria                                                | 10  | Inclusion and exclusion criteria for participants. If applicable, eligibility criteria for study centres and individuals who will perform the interventions (eg, surgeons, psychotherapists)                                                                                                                                                                                   | 7-8     |
| 5  |                                                                     |     |                                                                                                                                                                                                                                                                                                                                                                                |         |
| 6  |                                                                     |     |                                                                                                                                                                                                                                                                                                                                                                                |         |
| 7  |                                                                     |     |                                                                                                                                                                                                                                                                                                                                                                                |         |
| 8  | Interventions                                                       | 11a | Interventions for each group with sufficient detail to allow replication, including how and when they will be administered                                                                                                                                                                                                                                                     | 10      |
| 9  |                                                                     |     |                                                                                                                                                                                                                                                                                                                                                                                |         |
| 10 |                                                                     |     |                                                                                                                                                                                                                                                                                                                                                                                |         |
| 11 |                                                                     | 11b | Criteria for discontinuing or modifying allocated interventions for a given trial participant (eg, drug dose change in response to harms, participant request, or improving/worsening disease)                                                                                                                                                                                 | 11      |
| 12 |                                                                     |     |                                                                                                                                                                                                                                                                                                                                                                                |         |
| 13 |                                                                     |     |                                                                                                                                                                                                                                                                                                                                                                                |         |
| 14 |                                                                     | 11c | Strategies to improve adherence to intervention protocols, and any procedures for monitoring adherence (eg, drug tablet return, laboratory tests)                                                                                                                                                                                                                              | 12      |
| 15 |                                                                     |     |                                                                                                                                                                                                                                                                                                                                                                                |         |
| 16 |                                                                     |     |                                                                                                                                                                                                                                                                                                                                                                                |         |
| 17 |                                                                     |     |                                                                                                                                                                                                                                                                                                                                                                                |         |
| 18 |                                                                     | 11d | Relevant concomitant care and interventions that are permitted or prohibited during the trial                                                                                                                                                                                                                                                                                  | 10-11   |
| 19 |                                                                     |     |                                                                                                                                                                                                                                                                                                                                                                                |         |
| 20 |                                                                     |     |                                                                                                                                                                                                                                                                                                                                                                                |         |
| 21 | Outcomes                                                            | 12  | Primary, secondary, and other outcomes, including the specific measurement variable (eg, systolic blood pressure), analysis metric (eg, change from baseline, final value, time to event), method of aggregation (eg, median, proportion), and time point for each outcome. Explanation of the clinical relevance of chosen efficacy and harm outcomes is strongly recommended | 13-16   |
| 22 |                                                                     |     |                                                                                                                                                                                                                                                                                                                                                                                |         |
| 23 |                                                                     |     |                                                                                                                                                                                                                                                                                                                                                                                |         |
| 24 |                                                                     |     |                                                                                                                                                                                                                                                                                                                                                                                |         |
| 25 |                                                                     |     |                                                                                                                                                                                                                                                                                                                                                                                |         |
| 26 |                                                                     |     |                                                                                                                                                                                                                                                                                                                                                                                |         |
| 27 | Participant timeline                                                | 13  | Time schedule of enrolment, interventions (including any run-ins and washouts), assessments, and visits for participants. A schematic diagram is highly recommended (see Figure)                                                                                                                                                                                               | Figure2 |
| 28 |                                                                     |     |                                                                                                                                                                                                                                                                                                                                                                                |         |
| 29 |                                                                     |     |                                                                                                                                                                                                                                                                                                                                                                                |         |
| 30 |                                                                     |     |                                                                                                                                                                                                                                                                                                                                                                                |         |
| 31 | Sample size                                                         | 14  | Estimated number of participants needed to achieve study objectives and how it was determined, including clinical and statistical assumptions supporting any sample size calculations                                                                                                                                                                                          | 7       |
| 32 |                                                                     |     |                                                                                                                                                                                                                                                                                                                                                                                |         |
| 33 |                                                                     |     |                                                                                                                                                                                                                                                                                                                                                                                |         |
| 34 | Recruitment                                                         | 15  | Strategies for achieving adequate participant enrolment to reach target sample size                                                                                                                                                                                                                                                                                            | 9       |
| 35 |                                                                     |     |                                                                                                                                                                                                                                                                                                                                                                                |         |
| 36 |                                                                     |     |                                                                                                                                                                                                                                                                                                                                                                                |         |
| 37 | <b>Methods: Assignment of interventions (for controlled trials)</b> |     |                                                                                                                                                                                                                                                                                                                                                                                |         |
| 38 | Allocation:                                                         |     |                                                                                                                                                                                                                                                                                                                                                                                |         |
| 39 | Allocation:                                                         |     |                                                                                                                                                                                                                                                                                                                                                                                |         |
| 40 | Sequence generation                                                 | 16a | Method of generating the allocation sequence (eg, computer-generated random numbers), and list of any factors for stratification. To reduce predictability of a random sequence, details of any planned restriction (eg, blocking) should be provided in a separate document that is unavailable to those who enrol participants or assign interventions                       | 9       |
| 41 |                                                                     |     |                                                                                                                                                                                                                                                                                                                                                                                |         |
| 42 |                                                                     |     |                                                                                                                                                                                                                                                                                                                                                                                |         |
| 43 |                                                                     |     |                                                                                                                                                                                                                                                                                                                                                                                |         |
| 44 |                                                                     |     |                                                                                                                                                                                                                                                                                                                                                                                |         |
| 45 |                                                                     |     |                                                                                                                                                                                                                                                                                                                                                                                |         |
| 46 |                                                                     |     |                                                                                                                                                                                                                                                                                                                                                                                |         |
| 47 | Allocation concealment mechanism                                    | 16b | Mechanism of implementing the allocation sequence (eg, central telephone; sequentially numbered, opaque, sealed envelopes), describing any steps to conceal the sequence until interventions are assigned                                                                                                                                                                      | 9-10    |
| 48 |                                                                     |     |                                                                                                                                                                                                                                                                                                                                                                                |         |
| 49 |                                                                     |     |                                                                                                                                                                                                                                                                                                                                                                                |         |
| 50 |                                                                     |     |                                                                                                                                                                                                                                                                                                                                                                                |         |
| 51 |                                                                     |     |                                                                                                                                                                                                                                                                                                                                                                                |         |
| 52 | Implementation                                                      | 16c | Who will generate the allocation sequence, who will enrol participants, and who will assign participants to interventions                                                                                                                                                                                                                                                      | 9-10    |
| 53 |                                                                     |     |                                                                                                                                                                                                                                                                                                                                                                                |         |
| 54 | Blinding (masking)                                                  | 17a | Who will be blinded after assignment to interventions (eg, trial participants, care providers, outcome assessors, data analysts), and how                                                                                                                                                                                                                                      | 10      |
| 55 |                                                                     |     |                                                                                                                                                                                                                                                                                                                                                                                |         |
| 56 |                                                                     |     |                                                                                                                                                                                                                                                                                                                                                                                |         |
| 57 |                                                                     |     |                                                                                                                                                                                                                                                                                                                                                                                |         |

|    |                                                           |     |                                                                                                                                                                                                                                                                                                                                                                                                              |       |
|----|-----------------------------------------------------------|-----|--------------------------------------------------------------------------------------------------------------------------------------------------------------------------------------------------------------------------------------------------------------------------------------------------------------------------------------------------------------------------------------------------------------|-------|
| 1  |                                                           | 17b | If blinded, circumstances under which unblinding is permissible, and procedure for revealing a participant's allocated intervention during the trial                                                                                                                                                                                                                                                         | 10    |
| 2  |                                                           |     |                                                                                                                                                                                                                                                                                                                                                                                                              |       |
| 3  |                                                           |     |                                                                                                                                                                                                                                                                                                                                                                                                              |       |
| 4  |                                                           |     |                                                                                                                                                                                                                                                                                                                                                                                                              |       |
| 5  | <b>Methods: Data collection, management, and analysis</b> |     |                                                                                                                                                                                                                                                                                                                                                                                                              |       |
| 6  | Data collection methods                                   | 18a | Plans for assessment and collection of outcome, baseline, and other trial data, including any related processes to promote data quality (eg, duplicate measurements, training of assessors) and a description of study instruments (eg, questionnaires, laboratory tests) along with their reliability and validity, if known. Reference to where data collection forms can be found, if not in the protocol | 16    |
| 7  |                                                           |     |                                                                                                                                                                                                                                                                                                                                                                                                              |       |
| 8  |                                                           |     |                                                                                                                                                                                                                                                                                                                                                                                                              |       |
| 9  |                                                           |     |                                                                                                                                                                                                                                                                                                                                                                                                              |       |
| 10 |                                                           |     |                                                                                                                                                                                                                                                                                                                                                                                                              |       |
| 11 |                                                           |     |                                                                                                                                                                                                                                                                                                                                                                                                              |       |
| 12 |                                                           |     |                                                                                                                                                                                                                                                                                                                                                                                                              |       |
| 13 |                                                           |     |                                                                                                                                                                                                                                                                                                                                                                                                              |       |
| 14 |                                                           | 18b | Plans to promote participant retention and complete follow-up, including list of any outcome data to be collected for participants who discontinue or deviate from intervention protocols                                                                                                                                                                                                                    | 12&16 |
| 15 |                                                           |     |                                                                                                                                                                                                                                                                                                                                                                                                              |       |
| 16 |                                                           |     |                                                                                                                                                                                                                                                                                                                                                                                                              |       |
| 17 | Data management                                           | 19  | Plans for data entry, coding, security, and storage, including any related processes to promote data quality (eg, double data entry; range checks for data values). Reference to where details of data management procedures can be found, if not in the protocol                                                                                                                                            | 16    |
| 18 |                                                           |     |                                                                                                                                                                                                                                                                                                                                                                                                              |       |
| 19 |                                                           |     |                                                                                                                                                                                                                                                                                                                                                                                                              |       |
| 20 |                                                           |     |                                                                                                                                                                                                                                                                                                                                                                                                              |       |
| 21 |                                                           |     |                                                                                                                                                                                                                                                                                                                                                                                                              |       |
| 22 | Statistical methods                                       | 20a | Statistical methods for analysing primary and secondary outcomes. Reference to where other details of the statistical analysis plan can be found, if not in the protocol                                                                                                                                                                                                                                     | 17    |
| 23 |                                                           |     |                                                                                                                                                                                                                                                                                                                                                                                                              |       |
| 24 |                                                           |     |                                                                                                                                                                                                                                                                                                                                                                                                              |       |
| 25 |                                                           |     |                                                                                                                                                                                                                                                                                                                                                                                                              |       |
| 26 |                                                           | 20b | Methods for any additional analyses (eg, subgroup and adjusted analyses)                                                                                                                                                                                                                                                                                                                                     | 17    |
| 27 |                                                           |     |                                                                                                                                                                                                                                                                                                                                                                                                              |       |
| 28 |                                                           |     |                                                                                                                                                                                                                                                                                                                                                                                                              |       |
| 29 |                                                           | 20c | Definition of analysis population relating to protocol non-adherence (eg, as randomised analysis), and any statistical methods to handle missing data (eg, multiple imputation)                                                                                                                                                                                                                              | 17    |
| 30 |                                                           |     |                                                                                                                                                                                                                                                                                                                                                                                                              |       |
| 31 |                                                           |     |                                                                                                                                                                                                                                                                                                                                                                                                              |       |
| 32 | <b>Methods: Monitoring</b>                                |     |                                                                                                                                                                                                                                                                                                                                                                                                              |       |
| 33 | Data monitoring                                           | 21a | Composition of data monitoring committee (DMC); summary of its role and reporting structure; statement of whether it is independent from the sponsor and competing interests; and reference to where further details about its charter can be found, if not in the protocol. Alternatively, an explanation of why a DMC is not needed                                                                        | 16-17 |
| 34 |                                                           |     |                                                                                                                                                                                                                                                                                                                                                                                                              |       |
| 35 |                                                           |     |                                                                                                                                                                                                                                                                                                                                                                                                              |       |
| 36 |                                                           |     |                                                                                                                                                                                                                                                                                                                                                                                                              |       |
| 37 |                                                           |     |                                                                                                                                                                                                                                                                                                                                                                                                              |       |
| 38 |                                                           |     |                                                                                                                                                                                                                                                                                                                                                                                                              |       |
| 39 |                                                           |     |                                                                                                                                                                                                                                                                                                                                                                                                              |       |
| 40 |                                                           | 21b | Description of any interim analyses and stopping guidelines, including who will have access to these interim results and make the final decision to terminate the trial                                                                                                                                                                                                                                      | 9     |
| 41 |                                                           |     |                                                                                                                                                                                                                                                                                                                                                                                                              |       |
| 42 |                                                           |     |                                                                                                                                                                                                                                                                                                                                                                                                              |       |
| 43 |                                                           |     |                                                                                                                                                                                                                                                                                                                                                                                                              |       |
| 44 | Harms                                                     | 22  | Plans for collecting, assessing, reporting, and managing solicited and spontaneously reported adverse events and other unintended effects of trial interventions or trial conduct                                                                                                                                                                                                                            | 16    |
| 45 |                                                           |     |                                                                                                                                                                                                                                                                                                                                                                                                              |       |
| 46 |                                                           |     |                                                                                                                                                                                                                                                                                                                                                                                                              |       |
| 47 | Auditing                                                  | 23  | Frequency and procedures for auditing trial conduct, if any, and whether the process will be independent from investigators and the sponsor                                                                                                                                                                                                                                                                  | 16    |
| 48 |                                                           |     |                                                                                                                                                                                                                                                                                                                                                                                                              |       |
| 49 |                                                           |     |                                                                                                                                                                                                                                                                                                                                                                                                              |       |
| 50 |                                                           |     |                                                                                                                                                                                                                                                                                                                                                                                                              |       |
| 51 | <b>Ethics and dissemination</b>                           |     |                                                                                                                                                                                                                                                                                                                                                                                                              |       |
| 52 | Research ethics approval                                  | 24  | Plans for seeking research ethics committee/institutional review board (REC/IRB) approval                                                                                                                                                                                                                                                                                                                    | 17-18 |
| 53 |                                                           |     |                                                                                                                                                                                                                                                                                                                                                                                                              |       |
| 54 |                                                           |     |                                                                                                                                                                                                                                                                                                                                                                                                              |       |
| 55 |                                                           |     |                                                                                                                                                                                                                                                                                                                                                                                                              |       |

|    |                               |     |                                                                                                                                                                                                                                                                                     |                                             |
|----|-------------------------------|-----|-------------------------------------------------------------------------------------------------------------------------------------------------------------------------------------------------------------------------------------------------------------------------------------|---------------------------------------------|
| 1  | Protocol amendments           | 25  | Plans for communicating important protocol modifications (eg, changes to eligibility criteria, outcomes, analyses) to relevant parties (eg, investigators, REC/IRBs, trial participants, trial registries, journals, regulators)                                                    | 18                                          |
| 2  |                               |     |                                                                                                                                                                                                                                                                                     |                                             |
| 3  |                               |     |                                                                                                                                                                                                                                                                                     |                                             |
| 4  |                               |     |                                                                                                                                                                                                                                                                                     |                                             |
| 5  | Consent or assent             | 26a | Who will obtain informed consent or assent from potential trial participants or authorised surrogates, and how (see Item 32)                                                                                                                                                        | 18                                          |
| 6  |                               |     |                                                                                                                                                                                                                                                                                     |                                             |
| 7  |                               |     |                                                                                                                                                                                                                                                                                     |                                             |
| 8  |                               | 26b | Additional consent provisions for collection and use of participant data and biological specimens in ancillary studies, if applicable                                                                                                                                               | 9 & 16                                      |
| 9  |                               |     |                                                                                                                                                                                                                                                                                     |                                             |
| 10 |                               |     |                                                                                                                                                                                                                                                                                     |                                             |
| 11 | Confidentiality               | 27  | How personal information about potential and enrolled participants will be collected, shared, and maintained in order to protect confidentiality before, during, and after the trial                                                                                                | 16-18                                       |
| 12 |                               |     |                                                                                                                                                                                                                                                                                     |                                             |
| 13 |                               |     |                                                                                                                                                                                                                                                                                     |                                             |
| 14 |                               |     |                                                                                                                                                                                                                                                                                     |                                             |
| 15 | Declaration of interests      | 28  | Financial and other competing interests for principal investigators for the overall trial and each study site                                                                                                                                                                       | 22                                          |
| 16 |                               |     |                                                                                                                                                                                                                                                                                     |                                             |
| 17 |                               |     |                                                                                                                                                                                                                                                                                     |                                             |
| 18 | Access to data                | 29  | Statement of who will have access to the final trial dataset, and disclosure of contractual agreements that limit such access for investigators                                                                                                                                     | 16&18                                       |
| 19 |                               |     |                                                                                                                                                                                                                                                                                     |                                             |
| 20 |                               |     |                                                                                                                                                                                                                                                                                     |                                             |
| 21 |                               |     |                                                                                                                                                                                                                                                                                     |                                             |
| 22 | Ancillary and post-trial care | 30  | Provisions, if any, for ancillary and post-trial care, and for compensation to those who suffer harm from trial participation                                                                                                                                                       | Available in the informed consent materials |
| 23 |                               |     |                                                                                                                                                                                                                                                                                     |                                             |
| 24 |                               |     |                                                                                                                                                                                                                                                                                     |                                             |
| 25 | Dissemination policy          | 31a | Plans for investigators and sponsor to communicate trial results to participants, healthcare professionals, the public, and other relevant groups (eg, via publication, reporting in results databases, or other data sharing arrangements), including any publication restrictions | 18                                          |
| 26 |                               |     |                                                                                                                                                                                                                                                                                     |                                             |
| 27 |                               |     |                                                                                                                                                                                                                                                                                     |                                             |
| 28 |                               |     |                                                                                                                                                                                                                                                                                     |                                             |
| 29 |                               |     |                                                                                                                                                                                                                                                                                     |                                             |
| 30 |                               |     |                                                                                                                                                                                                                                                                                     |                                             |
| 31 |                               | 31b | Authorship eligibility guidelines and any intended use of professional writers                                                                                                                                                                                                      | 18                                          |
| 32 |                               |     |                                                                                                                                                                                                                                                                                     |                                             |
| 33 |                               |     |                                                                                                                                                                                                                                                                                     |                                             |
| 34 |                               | 31c | Plans, if any, for granting public access to the full protocol, participant-level dataset, and statistical code                                                                                                                                                                     | 16                                          |
| 35 |                               |     |                                                                                                                                                                                                                                                                                     |                                             |
| 36 | <b>Appendices</b>             |     |                                                                                                                                                                                                                                                                                     |                                             |
| 37 |                               |     |                                                                                                                                                                                                                                                                                     |                                             |
| 38 | Informed consent materials    | 32  | Model consent form and other related documentation given to participants and authorised surrogates                                                                                                                                                                                  | Available in Chinese version                |
| 39 |                               |     |                                                                                                                                                                                                                                                                                     |                                             |
| 40 |                               |     |                                                                                                                                                                                                                                                                                     |                                             |
| 41 | Biological specimens          | 33  | Plans for collection, laboratory evaluation, and storage of biological specimens for genetic or molecular analysis in the current trial and for future use in ancillary studies, if applicable                                                                                      | Not applicable                              |
| 42 |                               |     |                                                                                                                                                                                                                                                                                     |                                             |
| 43 |                               |     |                                                                                                                                                                                                                                                                                     |                                             |

\*It is strongly recommended that this checklist be read in conjunction with the SPIRIT 2013 Explanation & Elaboration for important clarification on the items. Amendments to the protocol should be tracked and dated. The SPIRIT checklist is copyrighted by the SPIRIT Group under the Creative Commons “Attribution-NonCommercial-NoDerivs 3.0 Unported” license.

# BMJ Open

## Effect of Baduanjin exercise on cognitive function in patients with post-stroke cognitive impairment: Study protocol for a randomized controlled trial

|                                 |                                                                                                                                                                                                                                                                                                                                                                                                                                                                                                                                                                   |
|---------------------------------|-------------------------------------------------------------------------------------------------------------------------------------------------------------------------------------------------------------------------------------------------------------------------------------------------------------------------------------------------------------------------------------------------------------------------------------------------------------------------------------------------------------------------------------------------------------------|
| Journal:                        | <i>BMJ Open</i>                                                                                                                                                                                                                                                                                                                                                                                                                                                                                                                                                   |
| Manuscript ID                   | bmjopen-2017-020954.R1                                                                                                                                                                                                                                                                                                                                                                                                                                                                                                                                            |
| Article Type:                   | Protocol                                                                                                                                                                                                                                                                                                                                                                                                                                                                                                                                                          |
| Date Submitted by the Author:   | 09-Mar-2018                                                                                                                                                                                                                                                                                                                                                                                                                                                                                                                                                       |
| Complete List of Authors:       | Zheng, Guohua; Shanghai University of Medicine & Health Sciences, College of Health Information Technology and Management<br>Zheng, Yuhui<br>Xiong, Zhenyu; Fujian University of Traditional Chinese Medicine, College of Rehabilitation Medicine<br>Ye, Bingzhao; Fujian University of Traditional Chinese Medicine, College of Rehabilitation Medicine<br>Tao, Jing; Fujian University of Traditional Chinese Medicine, Department of Physical Education<br>Chen, Lidian; Fujian University of Traditional Chinese Medicine, College of Rehabilitation Medicine |
| <b>Primary Subject Heading</b>: | Rehabilitation medicine                                                                                                                                                                                                                                                                                                                                                                                                                                                                                                                                           |
| Secondary Subject Heading:      | Reproductive medicine                                                                                                                                                                                                                                                                                                                                                                                                                                                                                                                                             |
| Keywords:                       | Baduanjin exercise, cognitive impairment after stroke, randomized controlled trial                                                                                                                                                                                                                                                                                                                                                                                                                                                                                |
|                                 |                                                                                                                                                                                                                                                                                                                                                                                                                                                                                                                                                                   |

SCHOLARONE™  
Manuscripts



1  
2  
3 **Effect of Baduanjin exercise on cognitive function in patients with**  
4 **post-stroke cognitive impairment: Study protocol for a randomized**  
5 **controlled trial**  
6  
7

8 Guohua Zheng<sup>1\*</sup>, Yuhui Zheng<sup>2\*</sup>, Zhenyu Xiong<sup>2</sup>, Bingzhao Ye<sup>2</sup>, Jing Tao<sup>2</sup>, Lidian  
9 Chen<sup>3#</sup>  
10  
11  
12  
13  
14

15 Guohua Zheng, Email: zhgh\_1969@aliyun.com  
16

17 College of Nursing and Health Management, Shanghai University of Medicine &  
18 Health Sciences, Shanghai 201318, China  
19

20 Yuhui Zheng, Email: 761363122@qq.com  
21

22 College of Rehabilitation Medicine, Fujian University of Traditional Chinese  
23 Medicine, Fuzhou 350122, China  
24  
25

26 Zhenyu Xiong, Email: 624548504@qq.com  
27

28 College of Rehabilitation Medicine, Fujian University of Traditional Chinese  
29 Medicine, Fuzhou 350122, China  
30  
31

32 Bingzhao Ye, Email: 949941043@qq.com  
33

34 College of Rehabilitation Medicine, Fujian University of Traditional Chinese  
35 Medicine, Fuzhou 350122, China  
36  
37

38 Jing Tao, Email: taojing01@163.com  
39

40 College of Rehabilitation Medicine, Fujian University of Traditional Chinese  
41 Medicine, Fuzhou 350122, China  
42  
43

44 Lidian Chen, Email: cld@fjtc.edu.cn  
45

46 Fujian Key Laboratory of Rehabilitation Technology, Fujian University of Traditional  
47 Chinese Medicine, Fuzhou 350122, China  
48  
49  
50

51  
52  
53  
54 1. College of Nursing and Health Management, Shanghai University of Medicine &  
55

1  
2  
3 Health Sciences, Shanghai 201318, China

4  
5 2. College of Rehabilitation Medicine, Fujian University of Traditional Chinese  
6 Medicine, Fuzhou 350122, China

7  
8  
9 3. Fujian Key Laboratory of Rehabilitation Technology, Fujian University of  
10 Traditional Chinese Medicine, Fuzhou 350122, China

11  
12  
13 \*Contributed equally

14  
15 #Corresponding author

16  
17  
18  
19  
20  
21 **Abstract**

22  
23 **INTRODUCTION:** Post-stroke cognitive impairment is one of the most common  
24 complications in stroke survivors, and over 65% of these patients suffer from  
25 cognitive impairment at 12 months following onset, which strongly affects the  
26 rehabilitation of their motor function and quality of life. Therefore, it is important to  
27 improve the cognitive ability of stroke survivors. As an important component of  
28 traditional Chinese Qigong exercises, characterized by the coordination of mind and  
29 body with a low exercise intensity, Baduanjin has the potential benefit of improving  
30 cognitive ability for stroke patients with cognitive impairment. The primary purpose  
31 of this study is to investigate the effectiveness and safety of Baduanjin training on the  
32 cognitive function of stroke survivors.  
33  
34  
35  
36  
37  
38  
39  
40  
41  
42  
43  
44

45  
46 **METHOD AND ANALYSIS:** This study is designed as a randomized, two-arm  
47 parallel controlled trial with allocation concealment and assessors blinding. A total of  
48 48 participants will be recruited and randomly allocated into the Baduanjin exercise  
49 intervention or control group. Baduanjin intervention will last 24 weeks with a  
50 frequency of 3 days a week and 40 min a day. Global cognitive function and the  
51  
52  
53  
54  
55

1  
2  
3 specific domains of cognition (i.e., memory, processing speed, execution, attention  
4 and visuospatial ability) will be measured at baseline, 8 weeks, 16 weeks, 24 weeks  
5 after intervention and 28 weeks after an additional 4-week follow-up period, while the  
6 motor function and quality of life will be measured at baseline, 24 weeks after  
7 intervention, and 28 weeks after an additional 4-week follow-up period.  
8  
9

10  
11  
12  
13  
14 **ETHICS AND DISSEMINATION:** Ethics approval was obtained from the Ethics  
15 Committee of Fujian University of Traditional Chinese Medicine Subsidiary  
16 Rehabilitation Hospital (approval number: 2016KY-022-01). The findings will be  
17 disseminated through peer-reviewed publications and at scientific conferences.  
18  
19  
20  
21

22  
23 **TRIAL REGISTRATION NUMBER:** ChiCTR-INR-16009364; Pre-results.  
24

25  
26 Registration date: 10 October, 2016.  
27

## 28 29 **KEYWORDS**

30  
31  
32 Baduanjin exercise, cognitive impairment after stroke, randomized controlled trial  
33  
34  
35  
36  
37  
38  
39

## 40 **Strengths and limitations of this study**

- 41  
42
- 43 ● This protocol presents a rigorous design of a randomized parallel controlled trial  
44 that aims to evaluate the effectiveness of Baduanjin exercise on the cognitive  
45 function, motor function and quality of life in stroke patients with cognitive  
46 impairment.  
47  
48
  - 49 ● A broad measurement tool and multiple measurement time points will be used to  
50 judge the effects of Baduanjin exercise on cognitive ability in stroke patients.  
51  
52  
53  
54  
55

- If the result we will reach is positive, that will provide a powerful evidence of Baduanjin exercise on improve cognitive function, motor function and quality of life in stroke survivors with cognitive impairment.
- The efficacy of a 24-week Baduanjin exercise intervention in stroke patients with cognitive impairment remains to be determined.

## Introduction

Stroke affects 15 million people annually and is a leading cause of death and disability worldwide <sup>[1]</sup>. In China, there are 6 million patients suffering from stroke, and this number increases at an annual rate of 9%. Stroke is associated with many long-term complications, such as motor dysfunction, language dysfunction and cognitive impairment. Post-stroke cognitive impairment is one of most common complications. Approximately 65% of stroke survivors suffer from some extent to cognitive impairment at five years post-stroke, and up to a quarter of those stroke survivors with cognitive impairment are more likely to transition to dementia <sup>[2]</sup>, which is associated with increased disability and a poor quality of life <sup>[3]</sup>. As a consequence, it is significant to improve the cognitive function as soon as possible to promote functional recovery and improve quality of life in stroke survivors <sup>[4]</sup>.

Theoretically, pharmacological therapy for cognition function may lead to improved recovery. Current data also indicate that a number of drugs may have short-term benefits <sup>[5-7]</sup>, but no drug treatment to date has shown convincing clinical

1  
2  
3 evidence on preventing further cognitive decline or restoring cognitive function for  
4 stroke survivors [8]. Thus, increasing attention has been paid to non-drug treatments.  
5  
6 Aerobic exercises have been widely recognized because of their obvious effect of  
7  
8 improving cognitive ability in stroke survivors [9-11]. However, most stroke patients do  
9  
10 not have sufficient compliance to achieve sufficient improvements in aerobic exercise  
11  
12 protocols due to an important concern of safety. Therefore, future stroke studies  
13  
14 involving aerobic exercise training should determine optimal protocols for individuals  
15  
16 with physical limitations [12]. As a mind-body exercise with mild to moderate intensity,  
17  
18 Baduanjin exercise is one of the most common forms of Qigong that has been  
19  
20 practised in China for more than 1000 years [13]. Baduanjin exercise consists of eight  
21  
22 separate and smooth movements and is easier to learn and practice with less limitation  
23  
24 than other aerobic exercises [14]. Therefore, this exercise is more suitable for older  
25  
26 adults, especially stroke patients. Increasing studies have demonstrated that regular  
27  
28 practice of Baduanjin exercise was beneficial to improve the physical and  
29  
30 psychological outcomes in older people, such as improving blood lipid metabolism  
31  
32 and sleep quality, lowering blood pressure, reducing depression and anxiety, and  
33  
34 improving physical flexibility [15-19]. Currently, several studies also show that regular  
35  
36 Baduanjin exercise could slow normal age-related decline in the memory domain, and  
37  
38 delay ageing of intelligence in older adults [20-21]. Consequently, the primary aim of  
39  
40 this study is to conduct a randomized controlled trial to evaluate systematically the  
41  
42 effect of Baduanjin exercise on the cognitive function in stroke patients with cognitive  
43  
44 impairment.  
45  
46  
47  
48  
49

## 50 **Method/Design**

51  
52 This report describes a two-arm, randomized, parallel controlled trial with allocation  
53  
54  
55

1  
2  
3 concealment and assessor blinding. The primary purpose is to evaluate the effect of  
4  
5 Baduanjin on cognitive functions, including global cognitive ability, and primary  
6  
7 cognitive domains, such as memory, attention, and visuospatial ability, in stroke  
8  
9 patients with cognitive impairment.  
10

11  
12 This study will be conducted at the Wufeng Community Centre in the Gulou  
13  
14 District and the Cangxia Community Centre in the Taijiang District, Fuzhou City,  
15  
16 Fujian, China, which are counterpart support communities of the Affiliated  
17  
18 Rehabilitation Hospital of Fujian University of Traditional Chinese Medicine. A total  
19  
20 of 48 eligible participants will be randomly allocated to either the intervention group  
21  
22 (the Baduanjin exercise group) or the control group (the health education group) in a  
23  
24 1:1 ratio. The participants in the intervention group will accept Baduanjin exercise  
25  
26 training intervention three times a week and the routine health education once every  
27  
28 four weeks for 24 weeks, while those allocated to the control group will only receive  
29  
30 the routine health education once every four weeks for 24 weeks. Primary and  
31  
32 secondary outcomes will be measured at baseline, 8 weeks, 16 weeks and 24 weeks  
33  
34 after intervention and at 28 weeks (after an additional 4-week follow-up period). A  
35  
36 flow diagram of the study design is shown in Figure 1. The study protocol is reported  
37  
38 according to Standard Protocol Items: Recommendations for Intervention Trials 2013  
39  
40 (SPIRIT). A SPIRIT Checklist and the schedule of enrolment, interventions and  
41  
42 assessments are provided in Additional file 1 and Figure 2.  
43  
44  
45

46  
47 Figure 1: Study design.  
48

49  
50 Additional file 1: SPIRIT 2013 Checklist.  
51

52  
53 Figure 2: Schedule of enrolment, interventions, and assessments.  
54  
55

### **Patient and Public Involvement**

This trial is currently in the recruitment phase. No patients and or public has involved in the trial.

### **Sample size**

Sample size was calculated on the basis of the changes in global cognitive ability after 24 weeks of intervention between comparison groups with a significance level of 5% and a two-tailed critical region. The means and their standard deviations (mean  $\pm$  SD) of global cognitive ability in the control and aerobic exercise intervention group were 75.93 $\pm$ 4.9 and 81.07 $\pm$ 6.16, respectively, at post-intervention according to the published literature [22]. A sample size of 40 participants was calculated to ensure the same effect size with 80% power by Gpower 3.1.9.2 software. Considering a 20% attrition rate, a total of 48 participants is necessary, with 24 participants being assigned to each group.

### **Study population**

The study population is stroke patients with a diagnosis of cognitive impairment living in Fuzhou City. The inclusion and exclusion criteria for the study sample are as follows.

### **Inclusion criteria**

The eligible participants should meet all of the following criteria:

① Clinical diagnosis of stroke according to the fourth national academic conference on cerebrovascular diseases Diagnostic Criteria for All Kinds of Cerebrovascular Disease [23] and confirmed by computed tomography or magnetic resonance imaging;

1  
2  
3  Have cognitive impairment diagnosed by Diagnostic and Statistical Manual  
4 Disorders (DSM-V);  
5

6  
7  
8  First ever stroke over three months;  
9

10  
11  Aged between 45 and 75 years;  
12

13  
14  Be conscious, with stable vital signs;  
15

16  
17  Ability to walk at least 10 metres without external force and auxiliary equipment;  
18

19  
20  Written informed consent.  
21

### 22 **Exclusion criteria**

23  
24 Criteria for exclusion are the following:  
25

26  
27  Have been suffering from brain tumour, brain trauma, brain parasite disease, or  
28 other diseases that could cause cognitive impairment;  
29

30  
31  
32  Severe language, vision, and/or auditory impairment or a neuropsychiatric disorder  
33 precluding cognitive examination;  
34

35  
36  
37  Have been suffering from diseases related to cognitive impairment confirmed by  
38 anamnesis, doctors, or families or with a history of cognitive drug use before stroke;  
39

40  
41  
42  Beck Depression Scale-II score >13;  
43

44  
45  Patients with alcohol or drug abuse;  
46

47  
48  Have been suffering from a severe medical condition, such as heart, liver, kidney,  
49 and endocrine diseases and haematopoietic system disease;  
50

51  
52  
53  Participating in another clinical trial that would affect the evaluation results of this  
54 study.  
55



### **Withdrawal or dropout criteria**

Participants in neither the intervention nor control group will be terminated to continue this trial according to the following criteria:

- ① Unwilling to continue this trial;
- ② Suffering from the deterioration of stroke disease or other serious organic diseases during the study period;
- ③ Do not complete the training scheme for four weeks during the study period;
- ④ Those who reject to be measured or followed up;
- ⑤ Suffering from the serious adverse event related to the research.

### **Recruitment and screening**

The recruitment of eligible participants will be conducted by posting up posters on the community publicity column, sending leaflets, and setting up a recruiting station at the Wufeng Community Centre in the Gulou District and the Cangxia Community Centre in the Taijiang District, Fuzhou City. The potentially eligible individuals will first complete a screening to determine their eligibility according to the inclusion and exclusion criteria. Eligible individuals will receive the information about this trial and have an informed discussion with two trained research assistants regarding the information provided. Those who are interested in this study will sign the written informed consent, and the baseline assessment will subsequently be arranged.

### **Randomization and allocation concealment**

After baseline assessment, the eligible participants will be randomly assigned to either the intervention group or the control group with equal rate. The random allocation sequence will be generated using the PLAN procedure of the statistical software SAS

1  
2  
3 v9.0 and be managed by an independent research assistant who is not involved in  
4 recruitment, evaluation and intervention of the participants. The eligible participants  
5 will be informed of their allocation result by the independent research assistant via  
6 telephone.  
7  
8  
9  
10

### 11 **Blinding**

12  
13  
14 In this trial, it is impossible to blind the participants and exercise coaches because this  
15 trial investigates a non-pharmacological intervention, but two types of blind codes  
16 will be used to blind the outcome assessors and data statisticians. We will assign an  
17 independent research manager to be in charge of the random allocation sequence and  
18 the blind codes. The participants' allocation result (the intervention group or the  
19 control group) will be replaced using alphabet 'A' or 'B' in the first blind code, and  
20 the real meaning of 'A' or 'B' will be marked in the second blind code. When the  
21 data-base is locked, the independent research assistant will deliver the group code 'A'  
22 or 'B' of participants to the statistician, and the real meaning of group 'A' or 'B' will  
23 be declared after analysis of all data is completed.  
24  
25  
26  
27  
28  
29  
30  
31  
32  
33  
34  
35  
36

### 37 **Intervention**

38  
39  
40 All participants will continue routine medical or rehabilitative treatment and maintain  
41 usual visits with their primary care physicians throughout the study if necessary.  
42  
43 Meanwhile, all of the participants will also receive the same health education  
44 programme during the intervention period. The Baduanjin exercise will be applied to  
45 the participants in the intervention group, while participants in the control group will  
46 be informed to maintain their usual lifestyle.  
47  
48  
49  
50  
51  
52  
53

54 The routine medical or rehabilitative treatment will be in accordance with the Chinese  
55

1  
2  
3 Medical Association's Guidelines for the Prevention and Treatment of  
4 Cerebrovascular Disease in China (2010) [24]. The detailed treatment schedule will be  
5 conducted by their primary care physicians and recorded by the research assistants.  
6  
7 The health education is conducted by the professional neurologists with a frequency  
8 of once a month and 40 minutes each time. The content of health education primarily  
9 involves the knowledge of the prevention and rehabilitation of stroke according to  
10 "Out of the Misunderstanding of Stroke Patients' Rehabilitation" (a bestseller book  
11 for health education after stroke from the Chinese Association of TCM) [25].  
12  
13  
14  
15  
16  
17  
18  
19  
20

### 21 **Intervention group**

22  
23 Participants in the intervention group will receive a 24-week Baduanjin exercise  
24 training, at the same time, they also receive routine medical or rehabilitative treatment  
25 and health education. The Baduanjin exercise training will last for 24 weeks with a  
26 frequency of 3 days a week and 40 min a day. The training scheme of Baduanjin  
27 exercise originates from the 'Health Qigong Baduanjin Standard' enacted by the State  
28 Sports General Administration in 2003 [26]. The whole set of Baduanjin exercise  
29 consists of ten postures (including the preparation and ending posture) (Figure 3). The  
30 participants will be gathered together to train when there are more than five  
31 participants recruited in the same community. Qualified Baduanjin exercise coaches  
32 from the Fujian University of Traditional Chinese Medicine with more than 5 years of  
33 teaching experience will be employed to guide participants' training.  
34  
35  
36  
37  
38  
39  
40  
41  
42  
43  
44  
45  
46  
47

48 Figure 3: Ten postures of Baduanjin.  
49

### 50 **Control group**

51  
52 The participants in the control group will not receive any specific exercise training  
53  
54  
55

1  
2  
3 from the study scheme. These participants will be requested to maintain their original  
4 habit of lifestyle.  
5

6  
7  
8 In order to exclude bias from the exceed activity of participants, all participants in  
9 both intervention and control group will be required to record an activity log in the  
10 intervention period, in which the duration and intensity of their activity in a whole day  
11 will be classified into three sections including the duration of low-intensity,  
12 moderate-intensity, or high-intensity activities.  
13  
14  
15  
16  
17

### 18 19 **Follow-up**

20  
21  
22 After the 24-week intervention period, all participants will enter an additional 4-week  
23 follow-up period. The participants will resume their original lifestyle during the  
24 follow-up period. Telephone follow-up or home visiting will be performed once a  
25 week by the research assistants. The information on participants' subjective feeling,  
26 medications and daily activities will be recorded. The primary and secondary  
27 outcomes will be evaluated at end of follow-up period.  
28  
29  
30  
31  
32  
33

### 34 35 **Participant retention and adherence**

36  
37  
38 The success of the intervention is strongly dependent on participants' active  
39 participation. To motivate participants' active participation, the staff will use several  
40 strategies to improve adherence to the intervention program: ① researchers will  
41 explain in detail the benefit of practising Baduanjin exercise after participants are  
42 randomly allocated into the intervention group; ② coaches will motivate participants'  
43 interest for the Baduanjin exercise training when they instruct participants practising  
44 the Baduanjin exercise; and ③ the research assistants will remind participants to  
45 practice the Baduanjin exercise according to the study scheme by the WeChat group.  
46  
47  
48 In addition, participant who complete the programme successfully will be rewarded  
49  
50  
51  
52  
53  
54  
55

1  
2  
3 with 100 RMB incentive money no matter which group they belongs to. Attendance  
4 of the Baduanjin exercise training will be recorded and assessed through records of  
5 the proportion of training days. Participants will be marked as absent when they do  
6 not attend the training session.  
7  
8  
9

10  
11 To improve participant retention, once a subject is randomized, the research assistants  
12 will make every reasonable effort to ensure the subjects stays for the entire study  
13 period. In detail, study assistants will □maintain participants' interests by interview  
14 and phone calls; □provide periodic communications via materials and talks to inform  
15 the participants of our acknowledgement of their support; and □be as flexible as  
16 possible with the study schedule in resolving time conflicts with participants' life.  
17  
18  
19  
20  
21

## 22 **Outcome Assessment**

### 23 **Primary outcome**

24  
25  
26  
27  
28 Global cognitive function will be measured using the Montreal Cognitive Assessment  
29 scale (MoCA). The MoCA scale is a brief test to evaluate the global cognitive ability  
30 by testing attention, naming, visuospatial/executive function, memory, language,  
31 visual structure skills, abstraction, calculation, and orientation with a total score of  
32 0-30 (a higher score equals better function). The Chinese version of the MoCA (Beijing  
33 version) was revised and is widely used in China with good validity and reliability <sup>[27]</sup>.  
34  
35  
36  
37  
38

39 Primary outcome will be assessed at baseline, 8 weeks, 16 weeks and 24 weeks after  
40 intervention and at 28 weeks after a 4-week follow-up period by the neurologists at  
41 the Affiliated Rehabilitation Hospital of FJTCM, who will be blinded to the allocation  
42 results of participants.  
43  
44  
45  
46  
47  
48  
49

### 50 **Secondary outcomes**

51  
52  
53 Secondary outcomes involving the specific cognitive domains (i.e., execution,  
54  
55

1  
2  
3 memory, attention, processing speed and visuospatial skill), gait, motor ability,  
4 balance ability, activities of daily living and quality of life. Executive ability, memory,  
5 attention, Processing speed and visuospatial ability will be measured at baseline, 8  
6 weeks, 16 weeks and 24 weeks after intervention and at 28 weeks after a 4-week  
7 follow-up period. Gait stability, motor Function, balance function, activities of daily  
8 living and quality of life will be assessed at baseline, 24 weeks of intervention and 28  
9 weeks after a 4-week follow-up period. All outcome assessments will be measured  
10 by the blinded medical staff.  
11  
12  
13  
14  
15  
16  
17  
18  
19

- 20 ● Executive ability will be assessed using the Trail Making Test (TMT). The TMT  
21 consists of two parts, TMT-A and TMT-B: TMT-A requires the participants to  
22 sequentially connect 25 encircled numbers on a sheet of paper, while TMT-B  
23 requires participants to draw a line alternating between numbers and letters in  
24 ascending order between the number and the letter, and the TMT-B/TMT-A is  
25 considered as a valid index of executive ability <sup>[28]</sup>.  
26  
27  
28  
29  
30  
31  
32  
33
- 34 ● Memory will be measured using the Chinese version of the Auditory Verbal Learning  
35 Test (AVLT) <sup>[29]</sup>. AVLT includes three subtests of immediate recall,  
36 short-term-delayed recall and long-term delayed recognition. In the immediate  
37 recall test, subject will be requested to repeat immediately a list of 15 unrelated  
38 words said by the assessor three times; after 15 minutes, subject will be asked to  
39 recall the 15 words, and the correct rate is the score of short-term-delayed recall. In  
40 the long-term delayed recognition test, a subject is given another list of 15 unrelated  
41 words and must recognize the original list of 15 words <sup>[30]</sup>. The Chinese version of  
42 the AVLT has been reported reliable with split-half reliability, internal consistency  
43 and structure validity <sup>[29]</sup>.  
44  
45  
46  
47  
48  
49  
50  
51  
52  
53  
54  
55

- 1  
2  
3 ● Attention will be measured using the Test of Attention Performance (TAP, V.2.3),  
4 which is based on computer-aided neuropsychological tests for assessing the  
5 attentional performance <sup>[31]</sup>. Four of this test's sub-tests, including alertness for  
6 reaction, general attention, Go/No Go and divided selective attention, will be  
7 chosen for this trial.  
8  
9  
10  
11  
12  
13  
14 ● Processing speed will be measured by the Digit Symbol Coding (DSC), which is a  
15 subtest of the Wechsler Adult Intelligence Scale-Revised China (WAIS-RC) with  
16 nine numbers from 1 to 9 and nine corresponding symbols <sup>[32]</sup>. A subject will be  
17 asked to draw each symbol under its corresponding number within a 90 s time limit,  
18 and the number of correct answers is its scores.  
19  
20  
21  
22  
23  
24  
25  
26 ● Visuospatial ability will be assessed by the Clock Drawing Task (CDT), which is a  
27 vision-dependent task <sup>[33]</sup>. The participants will be asked to draw a clock reading a  
28 specific time (generally 11:10). The correctness in clock drawing will be classified  
29 according to four categories <sup>[34]</sup>.  
30  
31  
32  
33  
34  
35 ● Gait stability and the interactions between cognitive tasks and gait will be  
36 measured by gait analysis <sup>[35]</sup>. Participants were instructed to walk in two  
37 assigned conditions: free walking as usual and walking as usual with executing a  
38 calculation task. The gait parameters in two conditions will be measured with the  
39 America Motion Analysis gait analysis system, and the numbers of completion  
40 and error rates in calculation tasks will be recorded. Those gait parameters mainly  
41 comprise of step length (cm), stride length (cm), forward velocity (cm/s), cadence  
42 (steps/min), total support time (%), swing time (%), double support time (%),  
43 single support time (%) and step width (cm). All these parameters include the  
44 affected and unaffected side.  
45  
46  
47  
48  
49  
50  
51  
52  
53  
54  
55

- 1  
2  
3 ● Motor Function will be evaluated using the Fugl-Meyer Assessment scale (FMA),  
4 which is known for its good validity and reliability in evaluating upper and lower  
5 limb function after stroke <sup>[36]</sup>. The FMA consists of 50 items based on a six-stage  
6 recovery process of Brunnstrom's hemiplegia classification, and 66 points of a  
7 possible 100 total score apply to the upper limbs, and the other 34 points are applied  
8 to the lower limbs <sup>[37]</sup>.  
9  
10  
11  
12  
13  
14  
15  
16 ● Balance Function will be measured by the Berg Balance Scale (BBS), which  
17 consists of a set of 14 tasks to quantitatively assess the static and dynamic balance  
18 abilities <sup>[38]</sup>. The BBS is not only one of the most important measurement scales to  
19 evaluate the balance function of patients after stroke but can also be used as the risk  
20 predictor of accidental fall in stroke patients <sup>[39]</sup>.  
21  
22  
23  
24  
25  
26  
27  
28 ● Activities of Daily Living (ADL) will be assessed using the Modified Barthel  
29 Index (MBI), which is a widely used standard scale for assessing functional  
30 disability in basic ADL. The MBI contains 10 projects with a total of 100 points,  
31 and the higher the score means the better the daily life self-care ability <sup>[40]</sup>.  
32  
33  
34  
35  
36  
37  
38 ● Quality of life will be measured by the Medical Outcomes Study 36-Item  
39 Short-Form Health Survey (SF-36), which is currently the most commonly used in  
40 clinical evaluation of quality of life in the general population and patients. The  
41 SF-36 consists of 36 items to assess eight health concepts, and each of them is  
42 evaluated separately by the normalized scores from 0 to 100, with the higher score  
43 corresponding to better health status <sup>[41]</sup>. The Chinese SF-36 has been demonstrated  
44 to have high reliability and validity in the Chinese population <sup>[42]</sup>.  
45  
46  
47  
48  
49  
50  
51  
52

### 53 Safety evaluation

54  
55  
56  
57  
58  
59  
60



1  
2  
3 Although no adverse events are reported currently regarding Baduanjin exercise, any  
4 unexpected adverse events during the intervention period will be reported to the  
5 research assistants, and causality in relation to the Baduanjin exercise training and the  
6 severity of adverse events will be evaluated. Serious adverse events will be reported  
7 to the ethics committee immediately.  
8  
9  
10  
11  
12

### 13 14 **Data management and monitoring** 15

16  
17 Data will be collected by the outcomes assessors using the print-based case report  
18 forms (p-CRFs), and the p-CRFs will later be inputted into the web-based case report  
19 forms (w-CRFs) in an electronic data capture system (EDC) by research assistants.  
20 The research assistants are also responsible for the integrity and accuracy of data  
21 when data are inputted into w-CRFs by means of checking on value ranges, or logical  
22 checks. The EDC system and web servers will be provided to the data management  
23 centre of FJTCM (<http://210.34.74.191/srtp/users/loginlangth.action>) and meet the  
24 available standards for security (the data management centre, which belongs to the  
25 Science and Technology Department of FJTCM, is in charge of the monitoring and  
26 auditing of all research data in FJTCM). Participants' data in w-CRFs will be stored in  
27 the EDC system in a separate password-protected location. All documents will be  
28 retained securely for five years after completion of the study.  
29  
30  
31  
32  
33  
34  
35  
36  
37  
38  
39  
40  
41  
42

### 43 **Statistical analysis** 44

45  
46 Statistical analysis will be performed using SPSS 22.0 (IBM, Chicago, IL, USA)  
47 software package by an independent statistician who is not involved in the outcome  
48 assessment, with a two-sided p value  $<0.05$  being considered to be statistically  
49 significant. Continuous variables will be expressed using mean and its standard error  
50 for normal distributions or median and its interquartile range for non-normal  
51  
52  
53  
54  
55  
56  
57  
58  
59  
60

distributions. Categorical variables will be described as frequencies or percentages.

Baseline characteristics between comparison groups will be compared using a t-test or Mann-Whitney U test for continuous variables and Pearson  $\chi^2$  or Fisher's exact test for categorical variables.

The analysis of primary or secondary outcomes will be based on an intention to treat (ITT) principle, and the missing data will be imputed using a multiple imputation method. The group difference between intervention and control group at each time point (8-week, 16-week, and 24-week after intervention or 4-week follow-up period) will be analysed using Student's t-test or Mann-Whitney U-test. Linear models or linear regression will be applied to adjust analysis if incomparability of baseline characteristics between groups appears. The linear mixed model with restricted maximum likelihood will be used to analyse the interaction effect of Group $\times$ Time.

Adverse events (AEs) will be analysed using a chi-square test or Fisher's exact test. If the formal statistical analyses between-groups cannot be performed due to the lack of power, AEs will be tabulated and summarized using descriptive statistics.

### **Ethics**

This study protocol conformed to the Declaration of Helsinki. Ethics approval of this study protocol, and consent forms were obtained from the Ethics Committee of Fujian University of Traditional Chinese Medicine Subsidiary Rehabilitation Hospital (approval number: 2016KY-022-01). The study background and main objective as well as potential benefits and risks will be fully explained to the participants and their families. Before participating in the study, participants will sign the informed consent document prior to participation.

## Dissemination

The study protocol has been registered and is available on the Chinese Clinical Trial Registry website (<http://www.chictr.org.cn> with the identifier number ChiCTR-INR-16009364). Study results will be first informed to each participant and later disseminated to researchers, healthcare providers, healthcare professionals and the general public through courses, presentations and the internet, regardless of the magnitude or direction of effect. The results will also be documented in a published peer reviewed academic journal.

## Discussion

As one of the most common forms of Chinese traditional exercises, Baduanjin exercise consists of eight separate movements, each of which focuses on a different physical area of the body <sup>[13]</sup>. Compared with other aerobic exercises, Baduanjin exercise is not only easy to learn but also is less physical and cognitive demanding <sup>[43]</sup>. Therefore, Baduanjin has become a popular and safe community exercise to promote health in the community of the older population of China. Furthermore, different from other types of aerobic exercise, Baduanjin is also a mind-body exercise combined with the holistic view and the theory of traditional Chinese medicine in that practitioners are required to reach coordination between mind and body <sup>[14]</sup>. Several studies have reported that regular Baduanjin training has a positive effect in slowing normal age-related memory decline <sup>[20-21]</sup>. Zhu HM et al. even reported that Baduanjin exercise can delay the cognitive impairment progression for the elderly diabetic patients with mild cognitive impairment <sup>[44]</sup>. Therefore, it is reasonable to assume that regular Baduanjin training could be beneficial to cognitive function in stroke patients. This proposed study aims to investigate the effect of Baduanjin exercise on cognitive

1  
2  
3 function, as well as observing the effect on motor function and quality of life in the  
4 stroke patients with cognitive impairment. This study will employ rigorousness to  
5 control bias, such as randomization, parallel control, and blinding of the outcome  
6 assessors and statistician. To ensure participants master standard Baduanjin  
7 movements, we will also employ qualified physical exercise teachers to serve as the  
8 Baduanjin exercise coaches. However, a potential limitation of this study is that  
9 participants and coaches cannot be blinded because it is impossible to make them  
10 blinded in non-pharmacological trials <sup>[45]</sup>. Therefore, performance bias may be  
11 inevitable, but the exercise coaches will be not involved in the recruitment, outcome  
12 assessment, or data analysis of this study. Another challenge that we may encounter  
13 for the study is the difficulty in recruiting the eligible stroke patients. Those stroke  
14 patients or their families may worry about the exercise risk and prefer to stay in their  
15 home and maintain a fairly static life. In addition, a higher dropout rate may also be  
16 expected due to the above concerns. To address these problems, we will encourage  
17 participants to practice the Baduanjin training at their home after they master this  
18 exercise. We also accounted for the higher dropout rate in the sample size estimation  
19 to ensure the sufficient statistical power for the study.  
20  
21  
22  
23  
24  
25  
26  
27  
28  
29  
30  
31  
32  
33  
34  
35  
36  
37  
38  
39

40 In summary, this report describes the first randomized controlled trial to evaluate  
41 systematically the rehabilitative effect of Baduanjin exercise on cognitive ability and  
42 motor function in stroke patients. This study will determine if Baduanjin training is  
43 likely to be effective in improving cognitive function, including global cognitive  
44 function and specific cognitive domains, in stroke patients with cognitive impairment.  
45 This study will also investigate if Baduanjin training can improve the motor function  
46 and quality of life for stroke patients with cognitive impairment and determine if this  
47  
48  
49  
50  
51  
52  
53  
54  
55

1  
2  
3 exercise is acceptable to them. If this trial is successfully conducted and demonstrates  
4 a significant result, that intervention would provide an effective rehabilitation  
5 approach for stroke patients and adequate supporting evidence for the application of  
6 regular Baduanjin exercise in patients with post-stroke cognitive impairment.  
7 Conversely, if this exercise training is not effective, the study will identify the factors  
8 that contributed to the negative outcome.  
9  
10  
11  
12  
13  
14  
15  
16  
17  
18

### 19 **Trial status**

20  
21 This trial is currently in the recruitment phase.  
22  
23  
24  
25  
26  
27

### 28 **Abbreviations**

29  
30  
31 SD: Standard deviation; DSM-V: Diagnostic and statistical manual disorders, 5th  
32 edition; SAS 9.0: Statistical analysis system; TCM: Traditional Chinese medicine;  
33 MoCA: Montreal cognitive assessment scale; FJTCM: Fujian University of  
34 Traditional Chinese Medicine; TMT: Trail Making Test; AVLT: Auditory verbal  
35 learning test; TAP: Test of attention performance; DSC: Digit symbol coding;  
36 WAIS-RC: Wechsler adult intelligence scale-revised China; CDT: Clock drawing task;  
37 FMA: Fugl-Meyer assessment scale; BBS: Berg balance scale; BI: Barthel index;  
38 ADL: Activities of daily living; SF-36: Item short-form health survey; CRF: Case  
39 report form; EDC: Electronic data capture system; SPSS 22.0: Statistic package for  
40 social science 22.0; ITT: Intention to treat.  
41  
42  
43  
44  
45  
46  
47  
48  
49  
50  
51  
52  
53  
54  
55

## Declarations

### Authors' contributions

CLD and ZGH conceived and designed of the study protocol and contributed to drafting the manuscript. ZYH and XZY wrote the manuscript and participated in the coordination and implementation of the study. ZGH revised the study protocol and wrote several sections of the manuscript. YBZ and TJ helped develop the study measures and data collection. All authors contributed to drafting the manuscript and have read and approved the final version of the manuscript.

### Funding

This study is financially supported by the Shanghai Municipal Commission of Health and Family Planning (No. 201640127) and the Specialized Research Fund for the Key Disciplines of Fujian University of Traditional Chinese Medicine (X2014070-Disciplines).

### Availability of data and materials

This is not applicable because this is a paper of a study protocol.

### Consent for publication

Not applicable.

### Competing interests

None declared.

**Reference:**

1. Feigin VL, Forouzanfar MH, Krishnamurthi R, Mensah GA, Connor M, Bennett DA, et al. Global and regional burden of stroke during 1990 - 2010: findings from the Global Burden of Disease Study 2010. *Lancet*. 2014; 383: 245-54.
2. Jin YP, Legge SD, Ostbye T, Feightner JW, Hachinski V. The reciprocal risks of stroke and cognitive impairment in an elderly population. *Alzheimers Dement*. 2006;2:171-8.
3. Geusgens CA, van Heugten CM, Cooijmans JP, Jolles J, van den Heuvel WJ. Transfer effects of a cognitive strategy training for stroke patients with apraxia. *J Clin Exp Neuropsychol*. 2007;29:831-41.
4. Cumming TB, Brodtmann A, Darby D, Bernhardt J. The importance of cognition to quality of life after stroke. *J Psychosom Res*. 2014;77:374-9.
5. Kavirajan H, Schneider LS. Efficacy and adverse effects of cholinesterase inhibitors and memantine in vascular dementia: A meta-analysis of randomised controlled trials. *Lancet Neurol*. 2007;6:782-92.
6. Jiao L, Zhang J, Li Z, Liu H, Chen Y, Xu S. Edaravone alleviates delayed neuronal death and long-dated cognitive dysfunction of hippocampus after transient focal ischemia in Wistar rat brains. *Neuroscience*. 2011;182:177-83.
7. Tomassoni D, Lanari A, Silvestrelli G, Traini E, Amenta F. Nimodipine and its use in cerebrovascular disease. Evidence from recent preclinical and controlled clinical

1  
2  
3 studies.Clin Exp Hypertens. 2008;30:744-766.  
4  
5

6  
7 8. Gillespie DC, Bowen A, Chung CS, Cockburn J, Knapp P, Pollock A.  
8  
9 Rehabilitation for post-stroke cognitive impairment: An overview of  
10  
11 recommendations arising from systematic reviews of current evidence. Clin Rehabil.  
12  
13 2015;29:120-8.  
14  
15

16  
17 9. Quaney BM, Boyd LA, Mcdowd JM, Zahner LH, He J, Mayo MS, et al. Aerobic  
18  
19 exercise improves cognition and motor function poststroke. Neurorehabil Neural  
20  
21 Repair. 2009;23:879-85.  
22  
23

24  
25 10. Moore SA, Hallsworth K, Jakovljevic DG, Blamire AM, He J, Ford GA, et al.  
26  
27 Effects of community exercise therapy on metabolic, brain, physical, and cognitive  
28  
29 function following stroke: A randomized controlled pilot trial. Neurorehabil Neural  
30  
31 Repair. 2015;29:623-35.  
32  
33

34  
35 11. Chin LM, Keyser RE, Dsurney J, Chan L. Improved cognitive performance  
36  
37 following aerobic exercise training in people with traumatic brain injury. Arch Phys  
38  
39 Med Rehabil. 2015;96:754-9.  
40  
41

42  
43 12. Tiozzo E, Youbi M, Dave K, Perez-Pinzon M, Rundek T, Sacco RL, et al. Aerobic,  
44  
45 resistance, and cognitive exercise training poststroke. Stroke. 2015;46:2012-6.  
46  
47

48  
49 13. Koh TC. Baduanjin -- an ancient Chinese exercise. Am J Chin Med.  
50  
51 1982;10:14-21.  
52  
53

54  
55 14. Li R, Jin L, Hong P, He ZH, Huang CY, Zhao JX, et al. The effect of baduanjin on  
56



1  
2  
3 promoting the physical fitness and health of adults. *Evid Based Complement Alternat*  
4  
5  
6 *Med.* 2014;doi:10.1155/2014/784059.

7  
8  
9 15. Mei L, Chen Q, Ge L, Zheng G, Chen J. Systematic review of chinese traditional  
10  
11 exercise baduanjin modulating the blood lipid metabolism. *Evid Based Complement*  
12  
13 *Alternat Med.* 2012;doi:10.1155/2012/282131.

14  
15  
16 16. Xiao CM, Zhuang YC. Effect of health Baduanjin Qigong for mild to moderate  
17  
18 Parkinson's disease. *Geriatr Gerontol Int.* 2015;16:911-9.

19  
20  
21 17. Liu HF, Hai-Yan AN, Wang CH. Psychological effects of Health Qigong Ba Duan  
22  
23 *Jin.* *Journal of Wuhan Institute of Physical Education.* 2008;42:54-7.

24  
25  
26 18. Xiong X, Wang P, Li S, Zhang Y, Li X. Effect of Baduanjin exercise for  
27  
28 hypertension: A systematic review and meta-analysis of randomized controlled trials.  
29  
30  
31  
32  
33 *Maturitas.* 2015;80:370-8.

34  
35  
36 19. Cheng FK. Effects of Baduanjin on mental health: A comprehensive review. *J*  
37  
38 *Bodyw Mov Ther.* 2015;19:138-49.

39  
40  
41 20. Wang ST. Effect of Baduanjin on physiological age of intelligence for old people.  
42  
43  
44 *Journal of Clinical Rehabilitative Tissue Engineering Research.* 2007;11:7910-3.

45  
46  
47 21. Ge S, Anli W. The influences of two different exercise means on the intellectual  
48  
49 physiological age of the male elderly people. *Journal of Beijing Sport University.*  
50  
51  
52 2008;31:1093-5.

53  
54  
55 22. Eltamawy MS, Abdallah F, Ahmed SM, Darwish MH, Khalifa HA. Aerobic

1  
2  
3  
4 exercises enhance cognitive functions and brain derived neurotrophic factor in  
5  
6 ischemic stroke patients. *Neuro Rehabilitation*. 2014;34:209-13.  
7

8  
9 23. The Fourth Academic Seminar of the Chinese Society for Neuroscience. Major  
10  
11 diagnostic points of cerebrovascular disease. *Chin J Neurol*. 1996; 29:379 - 80.  
12

13  
14 24. MI R. Guidelines of Cerebrovascular Disease Prevention and Treatment in China.  
15  
16 Beijing: People' s Medical Publishing House. 2010.  
17

18  
19 25. Ld C. Out of the Misunderstanding of Stroke Patients' Rehabilitation. Beijing:  
20  
21 People' s Medical Publishing House. 2008.  
22

23  
24 26. Health Qigong Management Center of General Administration of Sport of China:  
25  
26 Health Qigong-Baduanjin. Beijing: People' s Sports Publishing House of China. 2003.  
27

28  
29 27. Yusupu N, Yi Z. An introduction of Montreal Cognitive Assessment (MoCA) and  
30  
31 a comparison among its versions. *J Neurosci Mental Health*. 2010;10:516-9.  
32

33  
34 28. Arbuthnott K, Frank J. Trail making test, part b as a measure of executive control:  
35  
36 Validation using a Set-Switching paradigm. *J Clin Exp Neuropsychol*.  
37  
38 2000;22:518-28.  
39

40  
41 29. Guo QH, Sun YM, Pei-Min YU, Hong Z. Norm of auditory verbal learning test in  
42  
43 the normal aged in china community. *Chinese Journal of Clinical Psychology*.  
44  
45 2007;15:132-4.  
46

47  
48 30. Xie DD, Cheng HD, Yin CL, Lü XY, Wang K. Neuropsychological study of false  
49  
50 memory in patients with amnesia mild cognitive impairment. *Zhonghua Yi Xue Za*  
51  
52  
53  
54  
55  
56

Zhi. 2011;91:155-9.

31. Test of Attentional Performance (TAP, Version 2.3). Psytest. <http://www.psytest.net>. accessed 13 Oct 2015.

32. Yaoxian G. The revision of Wechsler adult intelligence scale. *Act Psychologica Sinicae*. 1983;15:362-70.

33. Agrell B, Dehlin O. The clock-drawing test. 1998. *Age Ageing*. 2012;41Suppl 3:iii41-5.

34. Shulman KI. Clock-drawing: Is it the ideal cognitive screening test? *Int J Geriatr Psychiatry*. 2000;15:548-61.

35. Plummer P, Villalobos RM, Vayda MS, Moser M, Johnson E. Feasibility of Dual-Task gait training for Community-Dwelling adults after stroke: A case series. *Stroke Res Treat*. 2014;doi: 10.1155/2014/538602.

36. Sullivan KJ, Tilson JK, Cen SY, Rose DK, Hershberg J, Correa A, et al. Fugl-Meyer assessment of sensorimotor function after stroke: Standardized training procedure for clinical practice and clinical trials. *Stroke*. 2011;42:427-32.

37. Kakuda W, Abo M, Shimizu M, Sasanuma J, Okamoto T, Yokoi A, et al. A multi-center study on low-frequency rTMS combined with intensive occupational therapy for upper limb hemiparesis in post-stroke patients. *J Neuroeng Rehabil*. 2012;doi: 10.1186/1743-0003-9-4.

38. Blum L, Kornerbitensky N. Usefulness of the Berg Balance Scale in stroke

1  
2  
3  
4 rehabilitation: A systematic review. *Phys Ther* 2008;88:559-66.  
5

6  
7 39. Ursin MH, Bergland A, Fure B, Tørstad A, Tveit A, Ihlehansen H. Balance and  
8  
9 mobility as predictors of Post-Stroke cognitive impairment. *Dement Geriatr Cogn Dis*  
10  
11 *Extra*. 2015;5:203-11.  
12

13  
14 40. Duffy L, Gajree S, Langhorne P, Stott DJ, Quinn TJ. Reliability (inter-rater  
15  
16 agreement) of the Barthel Index for assessment of stroke survivors: Systematic review  
17  
18 and meta-analysis. *Stroke*. 2013;44:462-8.  
19  
20

21  
22 41. Jr WJ, Sherbourne CD. The MOS 36-item short-form health survey (SF-36). I.  
23  
24 Conceptual framework and item selection. *Medical Care*. 1992;30:473-83.  
25  
26

27  
28 42. Jin WZ, Yu HT. A study of the reliability and validity of SF-36 scale on  
29  
30 evaluating health of population. *Chin Health Resour*. 2012;15:265-7.  
31  
32

33  
34 43. Zhou XQ, Zeng YG, Yang BL, Wang AL. Effects of health qigong and baduanjin  
35  
36 on the middle and old aged people's blood lipid. *Journal of Beijing Sport*  
37  
38 *University* .2007;30:795-7.  
39  
40

41  
42 44. Zhu HM, Zhang N, Ji C. Influence of Baduanjin on mild cognitive impairment in  
43  
44 elderly diabetic patients. *Chin J Prac Nurs*. 2015;31(16):1202-5.  
45  
46

47  
48 45. Boutron I, Moher D, Altman DG, Schulz KF, Ravaud P. Extending the CONSORT  
49  
50 statement to randomized trials of nonpharmacologic treatment: Explanation and  
51  
52 elaboration. *Ann Intern Med*. 2008;148:295-309.  
53  
54

1  
2  
3 **Additional files:**  
4

5 Additional file 1: SPIRIT 2013 Checklist: Recommended items to address in a clinical  
6 trial protocol and related documents.  
7

8  
9  
10 Additional figure 1: Study design.  
11

12  
13 Additional figure 2: Schedule of enrolment, interventions, and assessments.  
14

15  
16 Additional figure 3: Ten postures of Baduanjin.  
17  
18  
19  
20  
21  
22  
23  
24  
25  
26  
27  
28  
29  
30  
31  
32  
33  
34  
35  
36  
37  
38  
39  
40  
41  
42  
43  
44  
45  
46  
47  
48  
49  
50  
51  
52  
53  
54  
55  
56  
57  
58  
59  
60

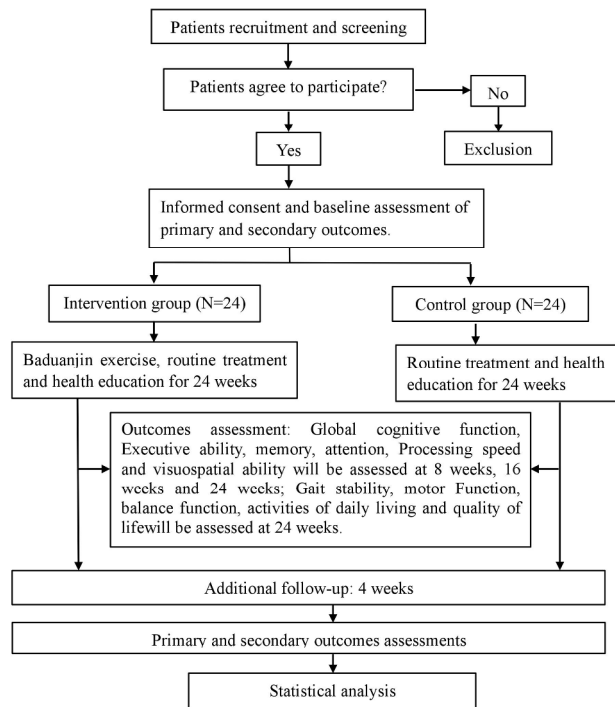

Figure 1 Flow diagram of study design

210x297mm (300 x 300 DPI)

| STUDY PERIOD                                                            |           |            |              |       |       |           |
|-------------------------------------------------------------------------|-----------|------------|--------------|-------|-------|-----------|
|                                                                         | Enrolment | Allocation | Intervention |       |       | Follow-up |
| TIMEPOINT*                                                              | - $t_1$   | 0          | $t_1$        | $t_2$ | $t_3$ | $t_4$     |
| <b>ENROLMENT:</b>                                                       |           |            |              |       |       |           |
| Eligibility screen                                                      | X         |            |              |       |       |           |
| Informed consent                                                        | X         |            |              |       |       |           |
| <b>ALLOCATION</b>                                                       |           |            |              |       |       |           |
|                                                                         |           | X          |              |       |       |           |
| <b>INTERVENTIONS:</b>                                                   |           |            |              |       |       |           |
| Intervention group<br>(Baduanjin exercise<br>training+health education) |           |            | ←————→       |       |       |           |
| Control group<br>(Health education)                                     |           |            | ←————→       |       |       |           |
| <b>ASSESSMENTS:</b>                                                     |           |            |              |       |       |           |
| Basic characteristics                                                   | X         |            |              |       |       |           |
| Global cognitive function                                               | X         |            | X            | X     | X     | X         |
| Executive ability                                                       | X         |            | X            | X     | X     | X         |
| Memory                                                                  | X         |            | X            | X     | X     | X         |
| Attention                                                               | X         |            | X            | X     | X     | X         |
| Processing speed                                                        | X         |            | X            | X     | X     | X         |
| Visuospatial ability                                                    | X         |            | X            | X     | X     | X         |
| Gait stability                                                          | X         |            |              |       | X     | X         |
| Motor Function                                                          | X         |            |              |       | X     | X         |
| Balance Function                                                        | X         |            |              |       | X     | X         |
| Activities of Daily Living                                              | X         |            |              |       | X     | X         |
| Quality of Life                                                         | X         |            |              |       | X     | X         |
| Adverse events                                                          |           |            | X            | X     | X     |           |

<Figure Legend>

\* - $t_1$  = -2(-1) weeks, 0 = Baseline,  $t_1$  = Week 8,  $t_2$  = Week 16,  $t_3$  = End of treatment Week 24,  $t_4$  = Follow Up Week 28.

Figure 2: Schedule of enrolment, interventions, and assessments

215x279mm (300 x 300 DPI)

1  
2  
3  
4  
5  
6  
7  
8  
9  
10  
11  
12  
13  
14  
15  
16  
17  
18  
19  
20  
21  
22  
23  
24  
25  
26  
27  
28  
29  
30  
31  
32  
33  
34  
35  
36  
37  
38  
39  
40  
41  
42  
43  
44  
45  
46  
47  
48  
49  
50  
51  
52  
53  
54  
55  
56  
57  
58  
59  
60

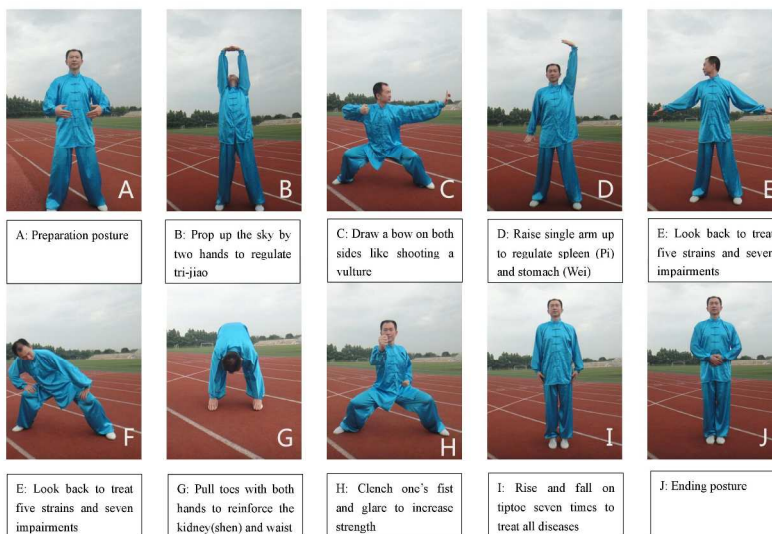

Figure 3: Ten postures of Baduanjin

297x210mm (300 x 300 DPI)

new only



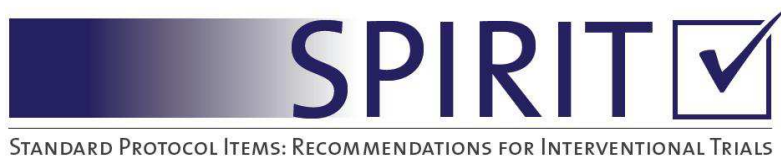

## SPIRIT 2013 Checklist: Recommended items to address in a clinical trial protocol and related documents\*

| Section/item                                              | Item No | Description                                                                                                                                                                                                                                                                              | Addressed on page number |
|-----------------------------------------------------------|---------|------------------------------------------------------------------------------------------------------------------------------------------------------------------------------------------------------------------------------------------------------------------------------------------|--------------------------|
| <b>Administrative information</b>                         |         |                                                                                                                                                                                                                                                                                          |                          |
| Title                                                     | 1       | Descriptive title identifying the study design, population, interventions, and, if applicable, trial acronym                                                                                                                                                                             | 1                        |
| Trial registration                                        | 2a      | Trial identifier and registry name. If not yet registered, name of intended registry                                                                                                                                                                                                     | 4                        |
|                                                           | 2b      | All items from the World Health Organization Trial Registration Data Set                                                                                                                                                                                                                 | 4                        |
| Protocol version                                          | 3       | Date and version identifier                                                                                                                                                                                                                                                              | 4                        |
| Funding                                                   | 4       | Sources and types of financial, material, and other support                                                                                                                                                                                                                              | 21                       |
| Roles and responsibilities                                | 5a      | Names, affiliations, and roles of protocol contributors                                                                                                                                                                                                                                  | 1 & 21                   |
|                                                           | 5b      | Name and contact information for the trial sponsor                                                                                                                                                                                                                                       | 21                       |
|                                                           | 5c      | Role of study sponsor and funders, if any, in study design; collection, management, analysis, and interpretation of data; writing of the report; and the decision to submit the report for publication, including whether they will have ultimate authority over any of these activities | 21                       |
|                                                           | 5d      | Composition, roles, and responsibilities of the coordinating centre, steering committee, endpoint adjudication committee, data management team, and other individuals or groups overseeing the trial, if applicable (see Item 21a for data monitoring committee)                         | 18                       |
| <b>Introduction</b>                                       |         |                                                                                                                                                                                                                                                                                          |                          |
| Background and rationale                                  | 6a      | Description of research question and justification for undertaking the trial, including summary of relevant studies (published and unpublished) examining benefits and harms for each intervention                                                                                       | 4-6                      |
|                                                           | 6b      | Explanation for choice of comparators                                                                                                                                                                                                                                                    | 11                       |
| Objectives                                                | 7       | Specific objectives or hypotheses                                                                                                                                                                                                                                                        | 6                        |
| Trial design                                              | 8       | Description of trial design including type of trial (eg, parallel group, crossover, factorial, single group), allocation ratio, and framework (eg, superiority, equivalence, noninferiority, exploratory)                                                                                | 6                        |
| <b>Methods: Participants, interventions, and outcomes</b> |         |                                                                                                                                                                                                                                                                                          |                          |

|    |                                                                     |     |                                                                                                                                                                                                                                                                                                                                                                                |         |
|----|---------------------------------------------------------------------|-----|--------------------------------------------------------------------------------------------------------------------------------------------------------------------------------------------------------------------------------------------------------------------------------------------------------------------------------------------------------------------------------|---------|
| 1  | Study setting                                                       | 9   | Description of study settings (eg, community clinic, academic hospital) and list of countries where data will be collected. Reference to where list of study sites can be obtained                                                                                                                                                                                             | 8       |
| 2  |                                                                     |     |                                                                                                                                                                                                                                                                                                                                                                                |         |
| 3  |                                                                     |     |                                                                                                                                                                                                                                                                                                                                                                                |         |
| 4  | Eligibility criteria                                                | 10  | Inclusion and exclusion criteria for participants. If applicable, eligibility criteria for study centres and individuals who will perform the interventions (eg, surgeons, psychotherapists)                                                                                                                                                                                   | 7-8     |
| 5  |                                                                     |     |                                                                                                                                                                                                                                                                                                                                                                                |         |
| 6  |                                                                     |     |                                                                                                                                                                                                                                                                                                                                                                                |         |
| 7  |                                                                     |     |                                                                                                                                                                                                                                                                                                                                                                                |         |
| 8  | Interventions                                                       | 11a | Interventions for each group with sufficient detail to allow replication, including how and when they will be administered                                                                                                                                                                                                                                                     | 10      |
| 9  |                                                                     |     |                                                                                                                                                                                                                                                                                                                                                                                |         |
| 10 |                                                                     |     |                                                                                                                                                                                                                                                                                                                                                                                |         |
| 11 |                                                                     | 11b | Criteria for discontinuing or modifying allocated interventions for a given trial participant (eg, drug dose change in response to harms, participant request, or improving/worsening disease)                                                                                                                                                                                 | 11      |
| 12 |                                                                     |     |                                                                                                                                                                                                                                                                                                                                                                                |         |
| 13 |                                                                     |     |                                                                                                                                                                                                                                                                                                                                                                                |         |
| 14 |                                                                     | 11c | Strategies to improve adherence to intervention protocols, and any procedures for monitoring adherence (eg, drug tablet return, laboratory tests)                                                                                                                                                                                                                              | 12      |
| 15 |                                                                     |     |                                                                                                                                                                                                                                                                                                                                                                                |         |
| 16 |                                                                     |     |                                                                                                                                                                                                                                                                                                                                                                                |         |
| 17 |                                                                     |     |                                                                                                                                                                                                                                                                                                                                                                                |         |
| 18 |                                                                     | 11d | Relevant concomitant care and interventions that are permitted or prohibited during the trial                                                                                                                                                                                                                                                                                  | 10-11   |
| 19 |                                                                     |     |                                                                                                                                                                                                                                                                                                                                                                                |         |
| 20 |                                                                     |     |                                                                                                                                                                                                                                                                                                                                                                                |         |
| 21 | Outcomes                                                            | 12  | Primary, secondary, and other outcomes, including the specific measurement variable (eg, systolic blood pressure), analysis metric (eg, change from baseline, final value, time to event), method of aggregation (eg, median, proportion), and time point for each outcome. Explanation of the clinical relevance of chosen efficacy and harm outcomes is strongly recommended | 13-16   |
| 22 |                                                                     |     |                                                                                                                                                                                                                                                                                                                                                                                |         |
| 23 |                                                                     |     |                                                                                                                                                                                                                                                                                                                                                                                |         |
| 24 |                                                                     |     |                                                                                                                                                                                                                                                                                                                                                                                |         |
| 25 |                                                                     |     |                                                                                                                                                                                                                                                                                                                                                                                |         |
| 26 |                                                                     |     |                                                                                                                                                                                                                                                                                                                                                                                |         |
| 27 | Participant timeline                                                | 13  | Time schedule of enrolment, interventions (including any run-ins and washouts), assessments, and visits for participants. A schematic diagram is highly recommended (see Figure)                                                                                                                                                                                               | Figure2 |
| 28 |                                                                     |     |                                                                                                                                                                                                                                                                                                                                                                                |         |
| 29 |                                                                     |     |                                                                                                                                                                                                                                                                                                                                                                                |         |
| 30 |                                                                     |     |                                                                                                                                                                                                                                                                                                                                                                                |         |
| 31 | Sample size                                                         | 14  | Estimated number of participants needed to achieve study objectives and how it was determined, including clinical and statistical assumptions supporting any sample size calculations                                                                                                                                                                                          | 7       |
| 32 |                                                                     |     |                                                                                                                                                                                                                                                                                                                                                                                |         |
| 33 |                                                                     |     |                                                                                                                                                                                                                                                                                                                                                                                |         |
| 34 | Recruitment                                                         | 15  | Strategies for achieving adequate participant enrolment to reach target sample size                                                                                                                                                                                                                                                                                            | 9       |
| 35 |                                                                     |     |                                                                                                                                                                                                                                                                                                                                                                                |         |
| 36 |                                                                     |     |                                                                                                                                                                                                                                                                                                                                                                                |         |
| 37 | <b>Methods: Assignment of interventions (for controlled trials)</b> |     |                                                                                                                                                                                                                                                                                                                                                                                |         |
| 38 | Allocation:                                                         |     |                                                                                                                                                                                                                                                                                                                                                                                |         |
| 39 | Allocation:                                                         |     |                                                                                                                                                                                                                                                                                                                                                                                |         |
| 40 | Sequence generation                                                 | 16a | Method of generating the allocation sequence (eg, computer-generated random numbers), and list of any factors for stratification. To reduce predictability of a random sequence, details of any planned restriction (eg, blocking) should be provided in a separate document that is unavailable to those who enrol participants or assign interventions                       | 9       |
| 41 |                                                                     |     |                                                                                                                                                                                                                                                                                                                                                                                |         |
| 42 |                                                                     |     |                                                                                                                                                                                                                                                                                                                                                                                |         |
| 43 |                                                                     |     |                                                                                                                                                                                                                                                                                                                                                                                |         |
| 44 |                                                                     |     |                                                                                                                                                                                                                                                                                                                                                                                |         |
| 45 |                                                                     |     |                                                                                                                                                                                                                                                                                                                                                                                |         |
| 46 |                                                                     |     |                                                                                                                                                                                                                                                                                                                                                                                |         |
| 47 | Allocation concealment mechanism                                    | 16b | Mechanism of implementing the allocation sequence (eg, central telephone; sequentially numbered, opaque, sealed envelopes), describing any steps to conceal the sequence until interventions are assigned                                                                                                                                                                      | 9-10    |
| 48 |                                                                     |     |                                                                                                                                                                                                                                                                                                                                                                                |         |
| 49 |                                                                     |     |                                                                                                                                                                                                                                                                                                                                                                                |         |
| 50 |                                                                     |     |                                                                                                                                                                                                                                                                                                                                                                                |         |
| 51 |                                                                     |     |                                                                                                                                                                                                                                                                                                                                                                                |         |
| 52 | Implementation                                                      | 16c | Who will generate the allocation sequence, who will enrol participants, and who will assign participants to interventions                                                                                                                                                                                                                                                      | 9-10    |
| 53 |                                                                     |     |                                                                                                                                                                                                                                                                                                                                                                                |         |
| 54 |                                                                     |     |                                                                                                                                                                                                                                                                                                                                                                                |         |
| 55 | Blinding (masking)                                                  | 17a | Who will be blinded after assignment to interventions (eg, trial participants, care providers, outcome assessors, data analysts), and how                                                                                                                                                                                                                                      | 10      |
| 56 |                                                                     |     |                                                                                                                                                                                                                                                                                                                                                                                |         |
| 57 |                                                                     |     |                                                                                                                                                                                                                                                                                                                                                                                |         |

|    |                                                           |     |                                                                                                                                                                                                                                                                                                                                                                                                              |       |
|----|-----------------------------------------------------------|-----|--------------------------------------------------------------------------------------------------------------------------------------------------------------------------------------------------------------------------------------------------------------------------------------------------------------------------------------------------------------------------------------------------------------|-------|
| 1  |                                                           | 17b | If blinded, circumstances under which unblinding is permissible, and procedure for revealing a participant's allocated intervention during the trial                                                                                                                                                                                                                                                         | 10    |
| 2  |                                                           |     |                                                                                                                                                                                                                                                                                                                                                                                                              |       |
| 3  |                                                           |     |                                                                                                                                                                                                                                                                                                                                                                                                              |       |
| 4  |                                                           |     |                                                                                                                                                                                                                                                                                                                                                                                                              |       |
| 5  | <b>Methods: Data collection, management, and analysis</b> |     |                                                                                                                                                                                                                                                                                                                                                                                                              |       |
| 6  | Data collection methods                                   | 18a | Plans for assessment and collection of outcome, baseline, and other trial data, including any related processes to promote data quality (eg, duplicate measurements, training of assessors) and a description of study instruments (eg, questionnaires, laboratory tests) along with their reliability and validity, if known. Reference to where data collection forms can be found, if not in the protocol | 16    |
| 7  |                                                           |     |                                                                                                                                                                                                                                                                                                                                                                                                              |       |
| 8  |                                                           |     |                                                                                                                                                                                                                                                                                                                                                                                                              |       |
| 9  |                                                           |     |                                                                                                                                                                                                                                                                                                                                                                                                              |       |
| 10 |                                                           |     |                                                                                                                                                                                                                                                                                                                                                                                                              |       |
| 11 |                                                           |     |                                                                                                                                                                                                                                                                                                                                                                                                              |       |
| 12 |                                                           |     |                                                                                                                                                                                                                                                                                                                                                                                                              |       |
| 13 |                                                           |     |                                                                                                                                                                                                                                                                                                                                                                                                              |       |
| 14 |                                                           | 18b | Plans to promote participant retention and complete follow-up, including list of any outcome data to be collected for participants who discontinue or deviate from intervention protocols                                                                                                                                                                                                                    | 12&16 |
| 15 |                                                           |     |                                                                                                                                                                                                                                                                                                                                                                                                              |       |
| 16 |                                                           |     |                                                                                                                                                                                                                                                                                                                                                                                                              |       |
| 17 | Data management                                           | 19  | Plans for data entry, coding, security, and storage, including any related processes to promote data quality (eg, double data entry; range checks for data values). Reference to where details of data management procedures can be found, if not in the protocol                                                                                                                                            | 16    |
| 18 |                                                           |     |                                                                                                                                                                                                                                                                                                                                                                                                              |       |
| 19 |                                                           |     |                                                                                                                                                                                                                                                                                                                                                                                                              |       |
| 20 |                                                           |     |                                                                                                                                                                                                                                                                                                                                                                                                              |       |
| 21 |                                                           |     |                                                                                                                                                                                                                                                                                                                                                                                                              |       |
| 22 | Statistical methods                                       | 20a | Statistical methods for analysing primary and secondary outcomes. Reference to where other details of the statistical analysis plan can be found, if not in the protocol                                                                                                                                                                                                                                     | 17    |
| 23 |                                                           |     |                                                                                                                                                                                                                                                                                                                                                                                                              |       |
| 24 |                                                           |     |                                                                                                                                                                                                                                                                                                                                                                                                              |       |
| 25 |                                                           |     |                                                                                                                                                                                                                                                                                                                                                                                                              |       |
| 26 |                                                           | 20b | Methods for any additional analyses (eg, subgroup and adjusted analyses)                                                                                                                                                                                                                                                                                                                                     | 17    |
| 27 |                                                           |     |                                                                                                                                                                                                                                                                                                                                                                                                              |       |
| 28 |                                                           |     |                                                                                                                                                                                                                                                                                                                                                                                                              |       |
| 29 |                                                           | 20c | Definition of analysis population relating to protocol non-adherence (eg, as randomised analysis), and any statistical methods to handle missing data (eg, multiple imputation)                                                                                                                                                                                                                              | 17    |
| 30 |                                                           |     |                                                                                                                                                                                                                                                                                                                                                                                                              |       |
| 31 |                                                           |     |                                                                                                                                                                                                                                                                                                                                                                                                              |       |
| 32 | <b>Methods: Monitoring</b>                                |     |                                                                                                                                                                                                                                                                                                                                                                                                              |       |
| 33 | Data monitoring                                           | 21a | Composition of data monitoring committee (DMC); summary of its role and reporting structure; statement of whether it is independent from the sponsor and competing interests; and reference to where further details about its charter can be found, if not in the protocol. Alternatively, an explanation of why a DMC is not needed                                                                        | 16-17 |
| 34 |                                                           |     |                                                                                                                                                                                                                                                                                                                                                                                                              |       |
| 35 |                                                           |     |                                                                                                                                                                                                                                                                                                                                                                                                              |       |
| 36 |                                                           |     |                                                                                                                                                                                                                                                                                                                                                                                                              |       |
| 37 |                                                           |     |                                                                                                                                                                                                                                                                                                                                                                                                              |       |
| 38 |                                                           |     |                                                                                                                                                                                                                                                                                                                                                                                                              |       |
| 39 |                                                           |     |                                                                                                                                                                                                                                                                                                                                                                                                              |       |
| 40 |                                                           | 21b | Description of any interim analyses and stopping guidelines, including who will have access to these interim results and make the final decision to terminate the trial                                                                                                                                                                                                                                      | 9     |
| 41 |                                                           |     |                                                                                                                                                                                                                                                                                                                                                                                                              |       |
| 42 |                                                           |     |                                                                                                                                                                                                                                                                                                                                                                                                              |       |
| 43 |                                                           |     |                                                                                                                                                                                                                                                                                                                                                                                                              |       |
| 44 | Harms                                                     | 22  | Plans for collecting, assessing, reporting, and managing solicited and spontaneously reported adverse events and other unintended effects of trial interventions or trial conduct                                                                                                                                                                                                                            | 16    |
| 45 |                                                           |     |                                                                                                                                                                                                                                                                                                                                                                                                              |       |
| 46 |                                                           |     |                                                                                                                                                                                                                                                                                                                                                                                                              |       |
| 47 | Auditing                                                  | 23  | Frequency and procedures for auditing trial conduct, if any, and whether the process will be independent from investigators and the sponsor                                                                                                                                                                                                                                                                  | 16    |
| 48 |                                                           |     |                                                                                                                                                                                                                                                                                                                                                                                                              |       |
| 49 |                                                           |     |                                                                                                                                                                                                                                                                                                                                                                                                              |       |
| 50 |                                                           |     |                                                                                                                                                                                                                                                                                                                                                                                                              |       |
| 51 | <b>Ethics and dissemination</b>                           |     |                                                                                                                                                                                                                                                                                                                                                                                                              |       |
| 52 | Research ethics approval                                  | 24  | Plans for seeking research ethics committee/institutional review board (REC/IRB) approval                                                                                                                                                                                                                                                                                                                    | 17-18 |
| 53 |                                                           |     |                                                                                                                                                                                                                                                                                                                                                                                                              |       |
| 54 |                                                           |     |                                                                                                                                                                                                                                                                                                                                                                                                              |       |
| 55 |                                                           |     |                                                                                                                                                                                                                                                                                                                                                                                                              |       |
| 56 |                                                           |     |                                                                                                                                                                                                                                                                                                                                                                                                              |       |
| 57 |                                                           |     |                                                                                                                                                                                                                                                                                                                                                                                                              |       |
| 58 |                                                           |     |                                                                                                                                                                                                                                                                                                                                                                                                              |       |
| 59 |                                                           |     |                                                                                                                                                                                                                                                                                                                                                                                                              |       |
| 60 |                                                           |     |                                                                                                                                                                                                                                                                                                                                                                                                              |       |

|    |                               |     |                                                                                                                                                                                                                                                                                     |                                             |
|----|-------------------------------|-----|-------------------------------------------------------------------------------------------------------------------------------------------------------------------------------------------------------------------------------------------------------------------------------------|---------------------------------------------|
| 1  | Protocol amendments           | 25  | Plans for communicating important protocol modifications (eg, changes to eligibility criteria, outcomes, analyses) to relevant parties (eg, investigators, REC/IRBs, trial participants, trial registries, journals, regulators)                                                    | 18                                          |
| 2  |                               |     |                                                                                                                                                                                                                                                                                     |                                             |
| 3  |                               |     |                                                                                                                                                                                                                                                                                     |                                             |
| 4  |                               |     |                                                                                                                                                                                                                                                                                     |                                             |
| 5  | Consent or assent             | 26a | Who will obtain informed consent or assent from potential trial participants or authorised surrogates, and how (see Item 32)                                                                                                                                                        | 18                                          |
| 6  |                               |     |                                                                                                                                                                                                                                                                                     |                                             |
| 7  |                               |     |                                                                                                                                                                                                                                                                                     |                                             |
| 8  |                               | 26b | Additional consent provisions for collection and use of participant data and biological specimens in ancillary studies, if applicable                                                                                                                                               | 9&16                                        |
| 9  |                               |     |                                                                                                                                                                                                                                                                                     |                                             |
| 10 |                               |     |                                                                                                                                                                                                                                                                                     |                                             |
| 11 | Confidentiality               | 27  | How personal information about potential and enrolled participants will be collected, shared, and maintained in order to protect confidentiality before, during, and after the trial                                                                                                | 16-18                                       |
| 12 |                               |     |                                                                                                                                                                                                                                                                                     |                                             |
| 13 |                               |     |                                                                                                                                                                                                                                                                                     |                                             |
| 14 |                               |     |                                                                                                                                                                                                                                                                                     |                                             |
| 15 | Declaration of interests      | 28  | Financial and other competing interests for principal investigators for the overall trial and each study site                                                                                                                                                                       | 22                                          |
| 16 |                               |     |                                                                                                                                                                                                                                                                                     |                                             |
| 17 |                               |     |                                                                                                                                                                                                                                                                                     |                                             |
| 18 | Access to data                | 29  | Statement of who will have access to the final trial dataset, and disclosure of contractual agreements that limit such access for investigators                                                                                                                                     | 16&18                                       |
| 19 |                               |     |                                                                                                                                                                                                                                                                                     |                                             |
| 20 |                               |     |                                                                                                                                                                                                                                                                                     |                                             |
| 21 | Ancillary and post-trial care | 30  | Provisions, if any, for ancillary and post-trial care, and for compensation to those who suffer harm from trial participation                                                                                                                                                       | Available in the informed consent materials |
| 22 |                               |     |                                                                                                                                                                                                                                                                                     |                                             |
| 23 |                               |     |                                                                                                                                                                                                                                                                                     |                                             |
| 24 |                               |     |                                                                                                                                                                                                                                                                                     |                                             |
| 25 | Dissemination policy          | 31a | Plans for investigators and sponsor to communicate trial results to participants, healthcare professionals, the public, and other relevant groups (eg, via publication, reporting in results databases, or other data sharing arrangements), including any publication restrictions | 18                                          |
| 26 |                               |     |                                                                                                                                                                                                                                                                                     |                                             |
| 27 |                               |     |                                                                                                                                                                                                                                                                                     |                                             |
| 28 |                               |     |                                                                                                                                                                                                                                                                                     |                                             |
| 29 |                               |     |                                                                                                                                                                                                                                                                                     |                                             |
| 30 |                               |     |                                                                                                                                                                                                                                                                                     |                                             |
| 31 |                               | 31b | Authorship eligibility guidelines and any intended use of professional writers                                                                                                                                                                                                      | 18                                          |
| 32 |                               |     |                                                                                                                                                                                                                                                                                     |                                             |
| 33 |                               |     |                                                                                                                                                                                                                                                                                     |                                             |
| 34 |                               | 31c | Plans, if any, for granting public access to the full protocol, participant-level dataset, and statistical code                                                                                                                                                                     | 16                                          |
| 35 |                               |     |                                                                                                                                                                                                                                                                                     |                                             |
| 36 | <b>Appendices</b>             |     |                                                                                                                                                                                                                                                                                     |                                             |
| 37 |                               |     |                                                                                                                                                                                                                                                                                     |                                             |
| 38 | Informed consent materials    | 32  | Model consent form and other related documentation given to participants and authorised surrogates                                                                                                                                                                                  | Available in Chinese version                |
| 39 |                               |     |                                                                                                                                                                                                                                                                                     |                                             |
| 40 |                               |     |                                                                                                                                                                                                                                                                                     |                                             |
| 41 | Biological specimens          | 33  | Plans for collection, laboratory evaluation, and storage of biological specimens for genetic or molecular analysis in the current trial and for future use in ancillary studies, if applicable                                                                                      | Not applicable                              |
| 42 |                               |     |                                                                                                                                                                                                                                                                                     |                                             |
| 43 |                               |     |                                                                                                                                                                                                                                                                                     |                                             |

\*It is strongly recommended that this checklist be read in conjunction with the SPIRIT 2013 Explanation & Elaboration for important clarification on the items. Amendments to the protocol should be tracked and dated. The SPIRIT checklist is copyrighted by the SPIRIT Group under the Creative Commons “[Attribution-NonCommercial-NoDerivs 3.0 Unported](https://creativecommons.org/licenses/by-nc-nd/3.0/)” license.

# BMJ Open

## Effect of Baduanjin exercise on cognitive function in patients with post-stroke cognitive impairment: Study protocol for a randomized controlled trial

|                                 |                                                                                                                                                                                                                                                                                                                                                                                                                                                                                                                                                                   |
|---------------------------------|-------------------------------------------------------------------------------------------------------------------------------------------------------------------------------------------------------------------------------------------------------------------------------------------------------------------------------------------------------------------------------------------------------------------------------------------------------------------------------------------------------------------------------------------------------------------|
| Journal:                        | <i>BMJ Open</i>                                                                                                                                                                                                                                                                                                                                                                                                                                                                                                                                                   |
| Manuscript ID                   | bmjopen-2017-020954.R2                                                                                                                                                                                                                                                                                                                                                                                                                                                                                                                                            |
| Article Type:                   | Protocol                                                                                                                                                                                                                                                                                                                                                                                                                                                                                                                                                          |
| Date Submitted by the Author:   | 25-Apr-2018                                                                                                                                                                                                                                                                                                                                                                                                                                                                                                                                                       |
| Complete List of Authors:       | Zheng, Guohua; Shanghai University of Medicine & Health Sciences, College of Health Information Technology and Management<br>Zheng, Yuhui<br>Xiong, Zhenyu; Fujian University of Traditional Chinese Medicine, College of Rehabilitation Medicine<br>Ye, Bingzhao; Fujian University of Traditional Chinese Medicine, College of Rehabilitation Medicine<br>Tao, Jing; Fujian University of Traditional Chinese Medicine, Department of Physical Education<br>Chen, Lidian; Fujian University of Traditional Chinese Medicine, College of Rehabilitation Medicine |
| <b>Primary Subject Heading</b>: | Rehabilitation medicine                                                                                                                                                                                                                                                                                                                                                                                                                                                                                                                                           |
| Secondary Subject Heading:      | Reproductive medicine                                                                                                                                                                                                                                                                                                                                                                                                                                                                                                                                             |
| Keywords:                       | Baduanjin exercise, cognitive impairment after stroke, randomized controlled trial                                                                                                                                                                                                                                                                                                                                                                                                                                                                                |
|                                 |                                                                                                                                                                                                                                                                                                                                                                                                                                                                                                                                                                   |

SCHOLARONE™  
Manuscripts

1  
2  
3 **Effect of Baduanjin exercise on cognitive function in patients with**  
4 **post-stroke cognitive impairment: Study protocol for a randomized**  
5 **controlled trial**  
6  
7

8 Guohua Zheng<sup>1\*</sup>, Yuhui Zheng<sup>2\*</sup>, Zhenyu Xiong<sup>2</sup>, Bingzhao Ye<sup>2</sup>, Jing Tao<sup>2</sup>, Lidian  
9 Chen<sup>3#</sup>  
10  
11  
12  
13  
14

15 Guohua Zheng, Email: zhgh\_1969@aliyun.com  
16

17 College of Nursing and Health Management, Shanghai University of Medicine &  
18 Health Sciences, Shanghai 201318, China  
19

20 Yuhui Zheng, Email: 761363122@qq.com  
21

22 College of Rehabilitation Medicine, Fujian University of Traditional Chinese  
23 Medicine, Fuzhou 350122, China  
24  
25

26 Zhenyu Xiong, Email: 624548504@qq.com  
27

28 College of Rehabilitation Medicine, Fujian University of Traditional Chinese  
29 Medicine, Fuzhou 350122, China  
30  
31

32 Bingzhao Ye, Email: 949941043@qq.com  
33

34 College of Rehabilitation Medicine, Fujian University of Traditional Chinese  
35 Medicine, Fuzhou 350122, China  
36  
37

38 Jing Tao, Email: taojing01@163.com  
39

40 College of Rehabilitation Medicine, Fujian University of Traditional Chinese  
41 Medicine, Fuzhou 350122, China  
42  
43

44 Lidian Chen, Email: cld@fjtc.edu.cn  
45

46 Fujian Key Laboratory of Rehabilitation Technology, Fujian University of Traditional  
47 Chinese Medicine, Fuzhou 350122, China  
48  
49  
50

51  
52  
53  
54 1. College of Nursing and Health Management, Shanghai University of Medicine &  
55

1  
2  
3 Health Sciences, Shanghai 201318, China

4  
5 2. College of Rehabilitation Medicine, Fujian University of Traditional Chinese  
6 Medicine, Fuzhou 350122, China

7  
8  
9 3. Fujian Key Laboratory of Rehabilitation Technology, Fujian University of  
10 Traditional Chinese Medicine, Fuzhou 350122, China

11  
12  
13 #Corresponding author: Professor Lidian Chen, Email: cld@fjtc.edu.cn

14  
15  
16 \*Contributed equally: Guohua Zheng and Yuhui Zheng contributed equally to this  
17 paper.

18  
19  
20  
21  
22  
23 **Abstract**

24  
25 **INTRODUCTION:** Post-stroke cognitive impairment is one of the most common  
26 complications in stroke survivors, and over 65% of these patients suffer from  
27 cognitive impairment at 12 months following onset, which strongly affects the  
28 rehabilitation of their motor function and quality of life. Therefore, it is important to  
29 improve the cognitive ability of stroke survivors. As an important component of  
30 traditional Chinese Qigong exercises, characterized by the coordination of mind and  
31 body with a low exercise intensity, Baduanjin has the potential benefit of improving  
32 cognitive ability for stroke patients with cognitive impairment. The primary purpose  
33 of this study is to investigate the effectiveness and safety of Baduanjin training on the  
34 cognitive function of stroke survivors.

35  
36  
37  
38  
39  
40  
41  
42  
43  
44  
45  
46  
47  
48 **METHOD AND ANALYSIS:** This study is designed as a randomized, two-arm  
49 parallel controlled trial with allocation concealment and assessors blinding. A total of  
50 48 participants will be recruited and randomly allocated into the Baduanjin exercise  
51 intervention or control group. Baduanjin intervention will last 24 weeks with a

1  
2  
3 frequency of 3 days a week and 40 min a day. Global cognitive function and the  
4  
5 specific domains of cognition (i.e., memory, processing speed, execution, attention  
6  
7 and visuospatial ability) will be measured at baseline, 8-, 16-, 24-week after  
8  
9 intervention and after an additional 4-week follow-up period, while the motor  
10  
11 function and quality of life will be measured at baseline, 24-week after intervention,  
12  
13 and after an additional 4-week follow-up period.  
14  
15

16 **ETHICS AND DISSEMINATION:** Ethics approval was obtained from the Ethics  
17  
18 Committee of Fujian University of Traditional Chinese Medicine Subsidiary  
19  
20 Rehabilitation Hospital (approval number: 2016KY-022-01). The findings will be  
21  
22 disseminated through peer-reviewed publications and at scientific conferences.  
23  
24

25 **TRIAL REGISTRATION NUMBER:** ChiCTR-INR-16009364; Pre-results.  
26  
27

28 Registration date: 10 October, 2016.  
29  
30

### 31 **KEYWORDS**

32  
33

34 Baduanjin exercise, cognitive impairment after stroke, randomized controlled trial  
35  
36  
37  
38  
39  
40  
41  
42  
43  
44

### 45 **Strengths and limitations of this study**

46  
47  
48  
49  
50  
51  
52  
53

- 45 ● This protocol presents a rigorous design of a randomized parallel controlled trial  
46  
47 that aims to evaluate the effectiveness of Baduanjin exercise on the cognitive  
48  
49 function, motor function and quality of life in stroke patients with cognitive  
50  
51 impairment.  
52
- 54 ● A broad measurement tool and multiple measurement time points will be used to  
55  
56  
57  
58  
59  
60



1  
2  
3 judge the effects of Baduanjin exercise on cognitive ability in stroke patients.  
4

- 5 ● If the result we will reach is positive, that will provide a powerful evidence of  
6 Baduanjin exercise on improve cognitive function, motor function and quality of  
7 life in stroke survivors with cognitive impairment.  
8
- 9 ● The efficacy of a 24-week Baduanjin exercise intervention in stroke patients with  
10 cognitive impairment remains to be determined.  
11  
12  
13  
14  
15  
16  
17  
18  
19  
20  
21  
22  
23  
24  
25

## 26 **Introduction**

27  
28 Stroke affects 15 million people annually and is a leading cause of death and  
29 disability worldwide <sup>[1]</sup>. In China, there are 6 million patients suffering from stroke,  
30 and this number increases at an annual rate of 9%. Stroke is associated with many  
31 long-term complications, such as motor dysfunction, language dysfunction and  
32 cognitive impairment. Post-stroke cognitive impairment is one of most common  
33 complications. Approximately 65% of stroke survivors suffer from some extent to  
34 cognitive impairment at five years post-stroke, and up to a quarter of those stroke  
35 survivors with cognitive impairment are more likely to transition to dementia <sup>[2]</sup>,  
36 which is associated with increased disability and a poor quality of life <sup>[3]</sup>. As a  
37 consequence, it is significant to improve the cognitive function as soon as possible to  
38 promote functional recovery and improve quality of life in stroke survivors <sup>[4]</sup>.  
39  
40  
41  
42  
43  
44  
45  
46  
47  
48  
49  
50  
51

52  
53 Theoretically, pharmacological therapy for cognition function may lead to  
54  
55

1  
2  
3 improved recovery. Current data also indicate that a number of drugs may have  
4 short-term benefits <sup>[5-7]</sup>, but no drug treatment to date has shown convincing clinical  
5 evidence on preventing further cognitive decline or restoring cognitive function for  
6 stroke survivors <sup>[8]</sup>. Thus, increasing attention has been paid to non-drug treatments.  
7  
8 Aerobic exercises have been widely recognized because of their obvious effect of  
9 improving cognitive ability in stroke survivors <sup>[9-11]</sup>. However, most stroke patients do  
10 not have sufficient compliance to achieve sufficient improvements in aerobic exercise  
11 protocols due to an important concern of safety. Therefore, future stroke studies  
12 involving aerobic exercise training should determine optimal protocols for individuals  
13 with physical limitations <sup>[12]</sup>. As a mind-body aerobic exercise with mild to moderate  
14 intensity, Baduanjin exercise has an emphasis on a combination of symmetrical  
15 physical postures, meditative mind, and breathing techniques in a harmonious manner,  
16 and is one of the most common forms of Qigong that has been practised in China for  
17 more than 1000 years <sup>[13]</sup>. Compared to complex and lengthy exercise form such as  
18 Tai Chi, Baduanjin exercise only consists of eight separate and smooth movements  
19 which is less physically and cognitively demanding, and is easier to learn and practice  
20 with less limitation <sup>[13-14]</sup>. Therefore, this exercise is more suitable for older adults,  
21 especially stroke patients. Increasing studies have demonstrated that regular practice  
22 of Baduanjin exercise was beneficial to improve the physical and psychological  
23 outcomes in older people, such as improving blood lipid metabolism and sleep quality,  
24 lowering blood pressure, reducing depression and anxiety, and improving physical  
25 flexibility <sup>[15-19]</sup>. Currently, several studies also show that regular Baduanjin exercise  
26 could slow normal age-related decline in the memory domain, and delay ageing of  
27 intelligence in older adults <sup>[20-21]</sup>. Consequently, the primary aim of this study is to  
28 conduct a randomized controlled trial to evaluate systematically the effect of  
29  
30  
31  
32  
33  
34  
35  
36  
37  
38  
39  
40  
41  
42  
43  
44  
45  
46  
47  
48  
49  
50  
51  
52  
53  
54  
55

1  
2  
3 Baduanjin exercise on the cognitive function in stroke patients with cognitive  
4  
5 impairment.  
6

## 7 8 **Method/Design** 9

10  
11 This report describes a two-arm, randomized, parallel controlled trial with allocation  
12 concealment and assessor blinding. The primary purpose is to evaluate the effect of  
13 Baduanjin on cognitive functions, including global cognitive ability, and primary  
14 cognitive domains, such as memory, attention, and visuospatial ability, in stroke  
15 patients with cognitive impairment.  
16  
17  
18  
19  
20  
21

22 This study will be conducted at the Wufeng Community Centre in the Gulou  
23 District and the Cangxia Community Centre in the Taijiang District, Fuzhou City,  
24 Fujian, China, which are counterpart support communities of the Affiliated  
25 Rehabilitation Hospital of Fujian University of Traditional Chinese Medicine. A total  
26 of 48 eligible participants will be randomly allocated to either the intervention group  
27 (the Baduanjin exercise group) or the control group (the health education group) in a  
28 1:1 ratio. The participants in the intervention group will accept Baduanjin exercise  
29 training intervention three times a week and the routine health education once every  
30 four weeks for 24 weeks, while those allocated to the control group will only receive  
31 the routine health education once every four weeks for 24 weeks. Primary and  
32 secondary outcomes will be measured at baseline, 8-, 16- and 24-week after  
33 intervention and after an additional 4-week follow-up period. A flow diagram of the  
34 study design is shown in Figure 1. The study protocol is reported according to  
35 Standard Protocol Items: Recommendations for Intervention Trials 2013 (SPIRIT). A  
36 SPIRIT Checklist and the schedule of enrolment, interventions and assessments are  
37 provided in Additional file 1 and Figure 2.  
38  
39  
40  
41  
42  
43  
44  
45  
46  
47  
48  
49  
50  
51  
52  
53  
54  
55

1  
2  
3 Figure 1: Study design.  
4

5 Additional file 1: SPIRIT 2013 Checklist.  
6  
7

8 Figure 2: Schedule of enrolment, interventions, and assessments.  
9

## 10 11 **Patient and Public Involvement** 12

13  
14 This trial is currently in the recruitment phase. No patients and or public has involved  
15 in the trial.  
16  
17

## 18 19 **Sample size** 20

21 Sample size was calculated on the basis of the changes in global cognitive ability after  
22 24 weeks of intervention between comparison groups with a significance level of 5%  
23 and a two-tailed critical region. The means and their standard deviations (mean  $\pm$  SD)  
24 of global cognitive ability in the control and aerobic exercise intervention group were  
25 75.93 $\pm$ 4.9 and 81.07 $\pm$ 6.16, respectively, at post-intervention according to the  
26 published literature <sup>[22]</sup>. A sample size of 40 participants was calculated to ensure the  
27 same effect size with 80% power by Gpower 3.1.9.2 software. Considering a 20%  
28 attrition rate, a total of 48 participants is necessary, with 24 participants being  
29 assigned to each group.  
30  
31  
32  
33  
34  
35  
36  
37  
38  
39  
40  
41

## 42 43 **Study population** 44

45 The study population is stroke patients with a diagnosis of cognitive impairment  
46 living in Fuzhou City. The inclusion and exclusion criteria for the study sample are as  
47 follows.  
48  
49  
50

## 51 52 **Inclusion criteria** 53

54 The eligible participants should meet all of the following criteria:  
55  
56

- 1  
2  
3  Clinical diagnosis of stroke according to the fourth national academic conference on  
4 cerebrovascular diseases Diagnostic Criteria for All Kinds of Cerebrovascular Disease  
5 [23] and confirmed by computed tomography or magnetic resonance imaging;  
6  
7  
8  
9  
10  Have cognitive impairment diagnosed by Diagnostic and Statistical Manual  
11 Disorders (DSM-V);  
12  
13  
14  
15  First ever stroke over three months;  
16  
17  
18  Aged between 45 and 75 years;  
19  
20  
21  Be conscious, with stable vital signs;  
22  
23  
24  Ability to walk at least 10 metres without external force and auxiliary equipment;  
25  
26  Written informed consent.

### 27 28 29 **Exclusion criteria**

30  
31 Criteria for exclusion are the following:

- 32  
33  
34  Have been suffering from brain tumour, brain trauma, brain parasite disease, or  
35 other diseases that could cause cognitive impairment;  
36  
37  
38  
39  Severe language, vision, and/or auditory impairment or a neuropsychiatric disorder  
40 precluding cognitive examination;  
41  
42  
43  
44  Have been suffering from diseases related to cognitive impairment confirmed by  
45 anamnesis, doctors, or families or with a history of cognitive drug use before stroke;  
46  
47  
48  
49  Beck Depression Scale-II score >13;  
50  
51  
52  Patients with alcohol or drug abuse;  
53  
54  
55  Have been suffering from a severe medical condition, such as heart, liver, kidney,

1  
2  
3 and endocrine diseases and haematopoietic system disease;

4  
5  Participating in another clinical trial that would affect the evaluation results of this  
6  
7 study.  
8  
9

### 10 **Withdrawal or dropout criteria**

11  
12  
13 Participants in neither the intervention nor control group will be terminated to  
14  
15 continue this trial according to the following criteria:  
16

- 17  
18 ① Unwilling to continue this trial;  
19  
20 ② Suffering from the deterioration of stroke disease or other serious organic diseases  
21 during the study period;  
22  
23 ③ Do not complete the training scheme for four weeks during the study period;  
24  
25 ④ Those who reject to be measured or followed up;  
26  
27 ⑤ Suffering from the serious adverse event related to the research.  
28  
29  
30  
31

### 32 **Recruitment and screening**

33  
34 The recruitment of eligible participants will be conducted by posting up posters on the  
35  
36 community publicity column, sending leaflets, and setting up a recruiting station at  
37  
38 the Wufeng Community Centre in the Gulou District and the Cangxia Community  
39  
40 Centre in the Taijiang District, Fuzhou City. The potentially eligible individuals will  
41  
42 first complete a screening to determine their eligibility according to the inclusion and  
43  
44 exclusion criteria. Eligible individuals will receive the information about this trial and  
45  
46 have an informed discussion with two trained research assistants regarding the  
47  
48 information provided. Those who are interested in this study will sign the written  
49  
50 informed consent, and the baseline assessment will subsequently be arranged.  
51  
52  
53

### 54 **Randomization and allocation concealment**

1  
2  
3 After baseline assessment, the eligible participants will be randomly assigned to either  
4 the intervention group or the control group with equal rate. The random allocation  
5 sequence will be generated using the PLAN procedure of the statistical software SAS  
6 v9.0 and be managed by an independent research assistant who is not involved in  
7 recruitment, evaluation and intervention of the participants. The eligible participants  
8 will be informed of their allocation result by the independent research assistant via  
9 telephone.  
10  
11  
12  
13  
14  
15  
16  
17

### 18 **Blinding**

19  
20  
21 In this trial, it is impossible to blind the participants and exercise coaches because this  
22 trial investigates a non-pharmacological intervention, but two types of blind codes  
23 will be used to blind the outcome assessors and data statisticians. We will assign an  
24 independent research manager to be in charge of the random allocation sequence and  
25 the blind codes. The participants' allocation result (the intervention group or the  
26 control group) will be replaced using alphabet 'A' or 'B' in the first blind code, and  
27 the real meaning of 'A' or 'B' will be marked in the second blind code. When the  
28 data-base is locked, the independent research assistant will deliver the group code 'A'  
29 or 'B' of participants to the statistician, and the real meaning of group 'A' or 'B' will  
30 be declared after analysis of all data is completed.  
31  
32  
33  
34  
35  
36  
37  
38  
39  
40  
41  
42  
43

### 44 **Intervention**

45  
46  
47 All participants will continue routine medical or rehabilitative treatment and maintain  
48 usual visits with their primary care physicians throughout the study if necessary.  
49 Meanwhile, all of the participants will also receive the same health education  
50 programme during the intervention period. The Baduanjin exercise will be applied to  
51  
52  
53  
54  
55

1  
2  
3 the participants in the intervention group, while participants in the control group will  
4  
5 be informed to maintain their usual lifestyle.  
6

7  
8 The routine medical or rehabilitative treatment will be in accordance with the Chinese  
9  
10 Medical Association's Guidelines for the Prevention and Treatment of  
11  
12 Cerebrovascular Disease in China (2010) [24]. The detailed treatment schedule will be  
13  
14 conducted by their primary care physicians and recorded by the research assistants.  
15  
16 The health education is conducted by the professional neurologists with a frequency  
17  
18 of once a month and 40 minutes each time. The content of health education primarily  
19  
20 involves the knowledge of the prevention and rehabilitation of stroke according to  
21  
22 "Out of the Misunderstanding of Stroke Patients' Rehabilitation" (a bestseller book  
23  
24 for health education after stroke from the Chinese Association of TCM) [25].  
25  
26

### 27 28 **Intervention group**

29  
30 Participants in the intervention group will receive a 24-week Baduanjin exercise  
31  
32 training, at the same time, they also receive routine medical or rehabilitative treatment  
33  
34 and health education. The Baduanjin exercise training will last for 24 weeks with a  
35  
36 frequency of 3 days a week and 40 min a day. The training scheme of Baduanjin  
37  
38 exercise originates from the 'Health Qigong Baduanjin Standard' enacted by the State  
39  
40 Sports General Administration in 2003 [26]. The whole set of Baduanjin exercise  
41  
42 consists of ten postures (including the preparation and ending posture) (Figure 3). The  
43  
44 participants will be gathered together to train when there are more than five  
45  
46 participants recruited in the same community. Qualified Baduanjin exercise coaches  
47  
48 from the Fujian University of Traditional Chinese Medicine with more than 5 years of  
49  
50 teaching experience will be employed to guide participants' training.  
51  
52  
53

54  
55 Figure 3: Ten postures of Baduanjin.



## Control group

The participants in the control group will not receive any specific exercise training from the study scheme. These participants will be requested to maintain their original habit of lifestyle.

In order to exclude bias from the exceed activity of participants, all participants in both intervention and control group will be required to record an activity log in the intervention period, in which the duration and intensity of their activity in a whole day will be classified into three sections including the duration of low-intensity, moderate-intensity, or high-intensity activities.

## Follow-up

After the 24-week intervention period, all participants will enter an additional 4-week follow-up period. The participants will resume their original lifestyle during the follow-up period. Telephone follow-up or home visiting will be performed once a week by the research assistants. The information on participants' subjective feeling, medications and daily activities will be recorded. The primary and secondary outcomes will be evaluated at end of follow-up period.

## Participant retention and adherence

The success of the intervention is strongly dependent on participants' active participation. To motivate participants' active participation, the staff will use several strategies to improve adherence to the intervention program: ① researchers will explain in detail the benefit of practising Baduanjin exercise after participants are randomly allocated into the intervention group; ② coaches will motivate participants' interest for the Baduanjin exercise training when they instruct participants practising the Baduanjin exercise; and ③ the research assistants will remind participants to

1  
2  
3 practice the Baduanjin exercise according to the study scheme by the WeChat group.  
4  
5 In addition, participant who complete the programme successfully will be rewarded  
6  
7 with 100 RMB incentive money no matter which group they belongs to. Attendance  
8  
9 of the Baduanjin exercise training will be recorded and assessed through records of  
10  
11 the proportion of training days. Participants will be marked as absent when they do  
12  
13 not attend the training session.

14  
15 To improve participant retention, once a subject is randomized, the research assistants  
16  
17 will make every reasonable effort to ensure the subjects stays for the entire study  
18  
19 period. In detail, study assistants will □maintain participants' interests by interview  
20  
21 and phone calls; □provide periodic communications via materials and talks to inform  
22  
23 the participants of our acknowledgement of their support; and □be as flexible as  
24  
25 possible with the study schedule in resolving time conflicts with participants' life.

## 26 **Outcome Assessment**

### 27 **Primary outcome**

28  
29  
30  
31  
32 Global cognitive function will be measured using the Montreal Cognitive Assessment  
33  
34 scale (MoCA). The MoCA scale is a brief test to evaluate the global cognitive ability  
35  
36 by testing attention, naming, visuospatial/executive function, memory, language,  
37  
38 visual structure skills, abstraction, calculation, and orientation with a total score of  
39  
40 0-30 (a higher score equals better function). The Chinese version of the MoCA (Beijing  
41  
42 version) was revised and is widely used in China with good validity and reliability <sup>[27]</sup>.  
43  
44  
45 Primary outcome will be assessed at baseline, 8 weeks, 16 weeks and 24 weeks after  
46  
47 intervention and after an additional 4-week follow-up period by the neurologists at the  
48  
49 Affiliated Rehabilitation Hospital of FJTCM, who will be blinded to the allocation  
50  
51 results of participants.  
52

### 53 **Secondary outcomes**

1  
2  
3 Secondary outcomes involving the specific cognitive domains (i.e., execution,  
4 memory, attention, processing speed and visuospatial skill), gait, motor ability,  
5 balance ability, activities of daily living and quality of life. Executive ability, memory,  
6 attention, Processing speed and visuospatial ability will be measured at baseline, 8  
7 weeks, 16 weeks and 24 weeks after intervention and after an additional 4-week  
8 follow-up period. Gait stability, motor Function, balance function, activities of daily  
9 living and quality of life will be assessed at baseline, 24 weeks of intervention and  
10 after an additional 4-week follow-up period. All outcome assessments will be  
11 measured by the blinded medical staff.  
12  
13  
14  
15  
16  
17  
18  
19  
20  
21

- 22  
23 ● Executive ability will be assessed using the Trail Making Test (TMT). The TMT  
24 consists of two parts, TMT-A and TMT-B: TMT-A requires the participants to  
25 sequentially connect 25 encircled numbers on a sheet of paper, while TMT-B  
26 requires participants to draw a line alternating between numbers and letters in  
27 ascending order between the number and the letter, and the TMT-B/TMT-A is  
28 considered as a valid index of executive ability<sup>[28]</sup>.  
29  
30  
31  
32  
33  
34  
35
- 36 ● Memory will be measured using the Chinese version of the Auditory Verbal Learning  
37 Test (AVLT)<sup>[29]</sup>. AVLT includes three subtests of immediate recall,  
38 short-term-delayed recall and long-term delayed recognition. In the immediate  
39 recall test, subject will be requested to repeat immediately a list of 15 unrelated  
40 words said by the assessor three times; after 15 minutes, subject will be asked to  
41 recall the 15 words, and the correct rate is the score of short-term-delayed recall. In  
42 the long-term delayed recognition test, a subject is given another list of 15 unrelated  
43 words and must recognize the original list of 15 words<sup>[30]</sup>. The Chinese version of  
44 the AVLT has been reported reliable with split-half reliability, internal consistency  
45  
46  
47  
48  
49  
50  
51  
52  
53  
54

1  
2  
3 and structure validity <sup>[29]</sup>.  
4

- 5 ● Attention will be measured using the Test of Attention Performance (TAP, V.2.3),  
6 which is based on computer-aided neuropsychological tests for assessing the  
7 attentional performance <sup>[31]</sup>. Four of this test's sub-tests, including alertness for  
8 reaction, general attention, Go/No Go and divided selective attention, will be  
9 chosen for this trial.  
10  
11  
12  
13  
14  
15
- 16 ● Processing speed will be measured by the Digit Symbol Coding (DSC), which is a  
17 subtest of the Wechsler Adult Intelligence Scale-Revised China (WAIS-RC) with  
18 nine numbers from 1 to 9 and nine corresponding symbols <sup>[32]</sup>. A subject will be  
19 asked to draw each symbol under its corresponding number within a 90 s time limit,  
20 and the number of correct answers is its scores.  
21  
22  
23  
24  
25  
26
- 27 ● Visuospatial ability will be assessed by the Clock Drawing Task (CDT), which is a  
28 vision-dependent task <sup>[33]</sup>. The participants will be asked to draw a clock reading a  
29 specific time (generally 11:10). The correctness in clock drawing will be classified  
30 according to four categories <sup>[34]</sup>.  
31  
32  
33  
34  
35  
36
- 37 ● Gait stability and the interactions between cognitive tasks and gait will be  
38 measured by gait analysis <sup>[35]</sup>. Participants were instructed to walk in two  
39 assigned conditions: free walking as usual and walking as usual with executing a  
40 calculation task. The gait parameters in two conditions will be measured with the  
41 America Motion Analysis gait analysis system, and the numbers of completion  
42 and error rates in calculation tasks will be recorded. Those gait parameters mainly  
43 comprise of step length (cm), stride length (cm), forward velocity (cm/s), cadence  
44 (steps/min), total support time (%), swing time (%), double support time (%),  
45 single support time (%) and step width (cm). All these parameters include the  
46  
47  
48  
49  
50  
51  
52  
53  
54  
55  
56

1  
2  
3 affected and unaffected side.  
4

- 5 ● Motor function will be evaluated using the Fugl-Meyer Assessment scale (FMA),  
6 which is known for its good validity and reliability in evaluating upper and lower  
7 limb function after stroke <sup>[36]</sup>. The FMA consists of 50 items based on a six-stage  
8 recovery process of Brunnstrom's hemiplegia classification, and 66 points of a  
9 possible 100 total score apply to the upper limbs, and the other 34 points are applied  
10 to the lower limbs <sup>[37]</sup>.  
11
- 12 ● Balance function will be measured by the Berg Balance Scale (BBS), which  
13 consists of a set of 14 tasks to quantitatively assess the static and dynamic balance  
14 abilities <sup>[38]</sup>. The BBS is not only one of the most important measurement scales to  
15 evaluate the balance function of patients after stroke but can also be used as the risk  
16 predictor of accidental fall in stroke patients <sup>[39]</sup>.  
17
- 18 ● Activities of Daily Living (ADL) will be assessed using the Modified Barthel  
19 Index (MBI), which is a widely used standard scale for assessing functional  
20 disability in basic ADL. The MBI contains 10 projects with a total of 100 points,  
21 and the higher the score means the better the daily life self-care ability <sup>[40]</sup>.  
22
- 23 ● Quality of life will be measured by the Medical Outcomes Study 36-Item  
24 Short-Form Health Survey (SF-36), which is currently the most commonly used in  
25 clinical evaluation of quality of life in the general population and patients. The  
26 SF-36 consists of 36 items to assess eight health concepts, and each of them is  
27 evaluated separately by the normalized scores from 0 to 100, with the higher score  
28 corresponding to better health status <sup>[41]</sup>. The Chinese SF-36 has been demonstrated  
29 to have high reliability and validity in the Chinese population <sup>[42]</sup>.  
30  
31  
32  
33  
34  
35  
36  
37  
38  
39  
40  
41  
42  
43  
44  
45  
46  
47  
48  
49  
50  
51  
52  
53  
54  
55

### **Safety evaluation**

Although no adverse events are reported currently regarding Baduanjin exercise, any unexpected adverse events during the intervention period will be reported to the research assistants, and causality in relation to the Baduanjin exercise training and the severity of adverse events will be evaluated. Serious adverse events will be reported to the ethics committee immediately.

### **Data management and monitoring**

Data will be collected by the outcomes assessors using the print-based case report forms (p-CRFs), and the p-CRFs will later be inputted into the web-based case report forms (w-CRFs) in an electronic data capture system (EDC) by research assistants. The research assistants are also responsible for the integrity and accuracy of data when data are inputted into w-CRFs by means of checking on value ranges, or logical checks. The EDC system and web servers will be provided to the data management centre of FJTCM (<http://210.34.74.191/srtp/users/loginlength.action>) and meet the available standards for security (the data management centre, which belongs to the Science and Technology Department of FJTCM, is in charge of the monitoring and auditing of all research data in FJTCM). Participants' data in w-CRFs will be stored in the EDC system in a separate password-protected location. All documents will be retained securely for five years after completion of the study.

### **Statistical analysis**

Statistical analysis will be performed using SPSS 22.0 (IBM, Chicago, IL, USA) software package by an independent statistician who is not involved in the outcome assessment, with a two-sided p value <0.05 being considered to be statistically

1  
2  
3 significant. Continuous variables will be expressed using mean and its standard error  
4 for normal distributions or median and its interquartile range for non-normal  
5 distributions. Categorical variables will be described as frequencies or percentages.  
6  
7

8  
9  
10 Baseline characteristics between comparison groups will be compared using a t-test or  
11 Mann-Whitney U test for continuous variables and Pearson  $\chi^2$  or Fisher's exact test for  
12 categorical variables.  
13  
14

15  
16  
17 The analysis of primary or secondary outcomes will be based on an intention to treat  
18 (ITT) principle, and the missing data will be imputed using a multiple imputation  
19 method. The group difference between intervention and control group at each time  
20 point (8-week, 16-week, and 24-week after intervention or 4-week follow-up period)  
21 will be analysed using Student's t-test or Mann-Whitney U-test. Linear models or  
22 linear regression will be applied to adjust analysis if incomparability of baseline  
23 characteristics between groups appears. The linear mixed model with restricted  
24 maximum likelihood will be used to analyse the interaction effect of Group $\times$ Time.  
25  
26  
27

28  
29  
30 Adverse events (AEs) will be analysed using a chi-square test or Fisher's exact test. If  
31 the formal statistical analyses between-groups cannot be performed due to the lack of  
32 power, AEs will be tabulated and summarized using descriptive statistics.  
33  
34  
35

### 36 37 38 39 40 41 42 **Ethics**

43  
44  
45 This study protocol conformed to the Declaration of Helsinki. Ethics approval of this  
46 study protocol, and consent forms were obtained from the Ethics Committee of Fujian  
47 University of Traditional Chinese Medicine Subsidiary Rehabilitation Hospital  
48 (approval number: 2016KY-022-01). The study background and main objective as  
49 well as potential benefits and risks will be fully explained to the participants and their  
50  
51  
52  
53  
54  
55

1  
2  
3 families. Before participating in the study, participants will sign the informed consent  
4  
5 document prior to participation.  
6

### 7 8 **Dissemination**

9  
10 The study protocol has been registered and is available on the Chinese Clinical Trial  
11  
12 Registry website (<http://www.chictr.org.cn> with the identifier number ChiCTR-INR-  
13  
14 16009364). Study results will be first informed to each participant and later  
15  
16 disseminated to researchers, healthcare providers, healthcare professionals and the  
17  
18 general public through courses, presentations and the internet, regardless of the  
19  
20 magnitude or direction of effect. The results will also be documented in a published  
21  
22 peer reviewed academic journal.  
23  
24  
25

### 26 27 **Discussion**

28  
29 As one of the most common forms of Chinese traditional exercises, Baduanjin  
30  
31 exercise consists of eight separate movements, each of which focuses on a different  
32  
33 physical area of the body <sup>[13]</sup>. Compared with other aerobic exercises, Baduanjin  
34  
35 exercise is not only easy to learn but also is less physical and cognitive demanding <sup>[43]</sup>.  
36  
37 Therefore, Baduanjin has become a popular and safe community exercise to promote  
38  
39 health in the community of the older population of China. Furthermore, different from  
40  
41 other types of aerobic exercise, Baduanjin is also a mind-body exercise combined  
42  
43 with the holistic view and the theory of traditional Chinese medicine in that  
44  
45 practitioners are required to reach coordination between mind and body <sup>[14]</sup>. Several  
46  
47 studies have reported that regular Baduanjin training has a positive effect in slowing  
48  
49 normal age-related memory decline <sup>[20-21]</sup>. Zhu et al. even reported that Baduanjin  
50  
51 exercise can delay the cognitive impairment progression for the elderly diabetic  
52  
53  
54  
55



1  
2  
3 patients with mild cognitive impairment <sup>[44]</sup>. Therefore, it is reasonable to assume that  
4  
5 regular Baduanjin training could be beneficial to cognitive function in stroke patients.  
6  
7 This proposed study aims to investigate the effect of Baduanjin exercise on cognitive  
8  
9 function, as well as observing the effect on motor function and quality of life in the  
10  
11 stroke patients with cognitive impairment. This study will employ rigorousness to  
12  
13 control bias, such as randomization, parallel control, and blinding of the outcome  
14  
15 assessors and statistician. To ensure participants master standard Baduanjin  
16  
17 movements, we will also employ qualified physical exercise teachers to serve as the  
18  
19 Baduanjin exercise coaches. However, a potential limitation of this study is that  
20  
21 participants and coaches cannot be blinded because it is impossible to make them  
22  
23 blinded in non-pharmacological trials <sup>[45]</sup>. Therefore, performance bias may be  
24  
25 inevitable, but the exercise coaches will be not involved in the recruitment, outcome  
26  
27 assessment, or data analysis of this study. Another challenge that we may encounter  
28  
29 for the study is the difficulty in recruiting the eligible stroke patients. Those stroke  
30  
31 patients or their families may worry about the exercise risk and prefer to stay in their  
32  
33 home and maintain a fairly static life. In addition, a higher dropout rate may also be  
34  
35 expected due to the above concerns. To address these problems, we will encourage  
36  
37 participants to practice the Baduanjin training at their home after they master this  
38  
39 exercise. We also accounted for the higher dropout rate in the sample size estimation  
40  
41 to ensure the sufficient statistical power for the study.  
42  
43  
44  
45

46  
47 In summary, this report describes the first randomized controlled trial to evaluate  
48  
49 systematically the rehabilitative effect of Baduanjin exercise on cognitive ability and  
50  
51 motor function in stroke patients. This study will determine if Baduanjin training is  
52  
53 likely to be effective in improving cognitive function, including global cognitive  
54  
55

1  
2  
3 function and specific cognitive domains, in stroke patients with cognitive impairment.  
4  
5 This study will also investigate if Baduanjin training can improve the motor function  
6  
7 and quality of life for stroke patients with cognitive impairment and determine if this  
8  
9 exercise is acceptable to them. If this trial is successfully conducted and demonstrates  
10  
11 a significant result, that intervention would provide an effective rehabilitation  
12  
13 approach for stroke patients and adequate supporting evidence for the application of  
14  
15 regular Baduanjin exercise in patients with post-stroke cognitive impairment.  
16  
17 Conversely, if this exercise training is not effective, the study will identify the factors  
18  
19 that contributed to the negative outcome.  
20  
21  
22  
23  
24

### 25 **Trial status**

26  
27  
28 This trial is currently in the recruitment phase.  
29  
30  
31  
32  
33  
34

### 35 **Abbreviations**

36  
37  
38 SD: Standard deviation; DSM-V: Diagnostic and statistical manual disorders, 5th  
39  
40 edition; SAS 9.0: Statistical analysis system; TCM: Traditional Chinese medicine;  
41  
42 MoCA: Montreal cognitive assessment scale; FJTCM: Fujian University of  
43  
44 Traditional Chinese Medicine; TMT: Trail Making Test; AVLT: Auditory verbal  
45  
46 learning test; TAP: Test of attention performance; DSC: Digit symbol coding;  
47  
48 WAIS-RC: Wechsler adult intelligence scale-revised China; CDT: Clock drawing task;  
49  
50 FMA: Fugl-Meyer assessment scale; BBS: Berg balance scale; BI: Barthel index;  
51  
52  
53  
54  
55 ADL: Activities of daily living; SF-36: Item short-form health survey; CRF: Case  
56  
57  
58  
59  
60

1  
2  
3  
4 report form; EDC: Electronic data capture system; SPSS 22.0: Statistic package for  
5  
6 social science 22.0; ITT: Intention to treat.  
7  
8  
9

## 11 **Declarations**

12  
13  
14 ZGH and ZYH contributed equally to this paper.  
15

## 17 **Contributor ship statement**

18  
19  
20 CLD(Correspondence) and ZGH conceived and designed of the study protocol and  
21  
22 contributed to drafting the manuscript. ZYH and XZY wrote the manuscript and  
23  
24 participated in the coordination and implementation of the study. ZGH revised the  
25  
26 study protocol and wrote several sections of the manuscript. YBZ and TJ helped  
27  
28 develop the study measures and data collection. All authors contributed to drafting the  
29  
30 manuscript and have read and approved the final version of the manuscript.  
31  
32

## 33 **Funding**

34  
35  
36 This study is financially supported by the Shanghai Municipal Commission of Health  
37  
38 and Family Planning (No. 201640127) and the Specialized Research Fund for the Key  
39  
40 Disciplines of Fujian University of Traditional Chinese Medicine  
41  
42 (X2014070-Disciplines).  
43  
44

## 45 **Availability of data and materials**

46  
47  
48 This is not applicable because this is a paper of a study protocol.  
49  
50

## 51 **Consent for publication**

52  
53  
54 Not applicable.  
55

### Competing interests

None declared.

### Reference:

1. Feigin VL, Forouzanfar MH, Krishnamurthi R, Mensah GA, Connor M, Bennett DA, et al. Global and regional burden of stroke during 1990 - 2010: findings from the Global Burden of Disease Study 2010. *Lancet*. 2014; 383: 245-54.
2. Jin YP, Legge SD, Ostbye T, Feightner JW, Hachinski V. The reciprocal risks of stroke and cognitive impairment in an elderly population. *Alzheimers Dement*. 2006;2:171-8.
3. Geusgens CA, van Heugten CM, Cooijmans JP, Jolles J, van den Heuvel WJ. Transfer effects of a cognitive strategy training for stroke patients with apraxia. *J Clin Exp Neuropsychol*. 2007;29:831-41.
4. Cumming TB, Brodtmann A, Darby D, Bernhardt J. The importance of cognition to quality of life after stroke. *J Psychosom Res*. 2014;77:374-9.
5. Kavirajan H, Schneider LS. Efficacy and adverse effects of cholinesterase inhibitors and memantine in vascular dementia: A meta-analysis of randomised controlled trials. *Lancet Neurol*. 2007;6:782-92.
6. Jiao L, Zhang J, Li Z, Liu H, Chen Y, Xu S. Edaravone alleviates delayed neuronal death and long-dated cognitive dysfunction of hippocampus after transient focal

1  
2  
3 ischemia in Wistar rat brains. *Neuroscience*. 2011;182:177-83.  
4  
5

6  
7 7. Tomassoni D, Lanari A, Silvestrelli G, Traini E, Amenta F. Nimodipine and its use  
8  
9 in cerebrovascular disease. Evidence from recent preclinical and controlled clinical  
10  
11 studies. *Clin Exp Hypertens*. 2008;30:744-766.  
12

13  
14 8. Gillespie DC, Bowen A, Chung CS, Cockburn J, Knapp P, Pollock A.  
15  
16 Rehabilitation for post-stroke cognitive impairment: An overview of  
17  
18 recommendations arising from systematic reviews of current evidence. *Clin Rehabil*.  
19  
20 2015;29:120-8.  
21  
22

23  
24 9. Quaney BM, Boyd LA, Mcdowd JM, Zahner LH, He J, Mayo MS, et al. Aerobic  
25  
26 exercise improves cognition and motor function poststroke. *Neurorehabil Neural*  
27  
28 *Repair*. 2009;23:879-85.  
29  
30

31  
32 10. Moore SA, Hallsworth K, Jakovljevic DG, Blamire AM, He J, Ford GA, et al.  
33  
34 Effects of community exercise therapy on metabolic, brain, physical, and cognitive  
35  
36 function following stroke: A randomized controlled pilot trial. *Neurorehabil Neural*  
37  
38 *Repair*. 2015;29:623-35.  
39  
40

41  
42 11. Chin LM, Keyser RE, Dsurney J, Chan L. Improved cognitive performance  
43  
44 following aerobic exercise training in people with traumatic brain injury. *Arch Phys*  
45  
46 *Med Rehabil*. 2015;96:754-9.  
47  
48

49  
50 12. Tiozzo E, Youbi M, Dave K, Perez-Pinzon M, Rundek T, Sacco RL, et al. Aerobic,  
51  
52 resistance, and cognitive exercise training poststroke. *Stroke*. 2015;46:2012-6.  
53  
54  
55

- 1  
2  
3  
4 13. Koh TC. Baduanjin -- an ancient Chinese exercise. *Am J Chin Med.*  
5  
6 1982;10:14-21.  
7  
8  
9 14. An BC, Wang Y, Jiang X, et al. Effects of Baduanjin, exercise on knee  
10  
11 osteoarthritis: a one-year study. *Chinese Journal of Integrative Medicine.*  
12  
13 2013;19(2):143-8.  
14  
15  
16 15. Mei L, Chen Q, Ge L, Zheng G, Chen J. Systematic review of chinese traditional  
17  
18 exercise baduanjin modulating the blood lipid metabolism. *Evid Based Complement*  
19  
20 *Alternat Med.* 2012;doi:10.1155/2012/282131.  
21  
22  
23 16. Xiao CM, Zhuang YC. Effect of health Baduanjin Qigong for mild to moderate  
24  
25 Parkinson's disease. *Geriatr Gerontol Int.* 2015;16:911-9.  
26  
27  
28 17. Liu HF, Hai-Yan AN, Wang CH. Psychological effects of Health Qigong Ba Duan  
29  
30 Jin. *Journal of Wuhan Institute of Physical Education.* 2008;42:54-7.  
31  
32  
33 18. Xiong X, Wang P, Li S, Zhang Y, Li X. Effect of Baduanjin exercise for  
34  
35 hypertension: A systematic review and meta-analysis of randomized controlled trials.  
36  
37 *Maturitas.* 2015;80:370-8.  
38  
39  
40 19. Cheng FK. Effects of Baduanjin on mental health: A comprehensive review. *J*  
41  
42 *Bodyw Mov Ther.* 2015;19:138-49.  
43  
44  
45 20. Wang ST. Effect of Baduanjin on physiological age of intelligence for old people.  
46  
47 *Journal of Clinical Rehabilitative Tissue Engineering Research.* 2007;11:7910-3.  
48  
49  
50 21. Ge S, Anli W. The influences of two different exercise means on the intellectual  
51  
52  
53  
54  
55  
56  
57  
58  
59  
60

1  
2  
3 physiological age of the male elderly people. Journal of Beijing Sport University.  
4  
5  
6 2008;31:1093-5.  
7

8  
9 22. Eltamawy MS, Abdallah F, Ahmed SM, Darwish MH, Khalifa HA. Aerobic  
10  
11 exercises enhance cognitive functions and brain derived neurotrophic factor in  
12  
13 ischemic stroke patients. Neuro Rehabilitation. 2014;34:209-13.  
14  
15

16  
17 23. The Fourth Academic Seminar of the Chinese Society for Neuroscience. Major  
18  
19 diagnostic points of cerebrovascular disease. Chin J Neurol. 1996; 29:379 - 80.  
20  
21

22  
23 24. MI R. Guidelines of Cerebrovascular Disease Prevention and Treatment in China.  
24  
25 Beijing: People' s Medical Publishing House. 2010.  
26  
27

28  
29 25. Ld C. Out of the Misunderstanding of Stroke Patients' Rehabilitation. Beijing:  
30  
31 People' s Medical Publishing House. 2008.  
32

33  
34 26. Health Qigong Management Center of General Administration of Sport of China:  
35  
36 Health Qigong-Baduanjin. Beijing: People' s Sports Publishing House of China. 2003.  
37  
38

39  
40 27. Yusupu N, Yi Z. An introduction of Montreal Cognitive Assessment (MoCA) and  
41  
42 a comparison among its versions. J Neurosci Mental Health. 2010;10:516-9.  
43

44  
45 28. Arbuthnott K, Frank J. Trail making test, part b as a measure of executive control:  
46  
47 Validation using a Set-Switching paradigm. J Clin Exp Neuropsychol.  
48  
49 2000;22:518-28.  
50

51  
52 29. Guo QH, Sun YM, Pei-Min YU, Hong Z. Norm of auditory verbal learning test in  
53  
54 the normal aged in china community. Chinese Journal of Clinical Psychology.  
55  
56

1  
2  
3 2007;15:132-4.  
4  
5

6 30. Xie DD, Cheng HD, Yin CL, Lü XY, Wang K. Neuropsychological study of false  
7 memory in patients with amnesia mild cognitive impairment. *Zhonghua Yi Xue Za*  
8 *Zhi*. 2011;91:155-9.  
9  
10  
11  
12

13  
14 31. Test of Attentional Performance (TAP, Version 2.3). Psytest. <http://www.psytest.net>.  
15 accessed 13 Oct 2015.  
16  
17

18  
19  
20 32. Yaoxian G. The revision of Wechsler adult intelligence scale. *Act Psychological*  
21 *Sinicae*. 1983;15:362-70.  
22  
23

24  
25 33. Agrell B, Dehlin O. The clock-drawing test.1998. *Age Ageing*. 2012;41Suppl  
26 3:iii41-5.  
27  
28

29  
30  
31 34. Shulman KI. Clock-drawing: Is it the ideal cognitive screening test?.*Int J Geriatr*  
32 *Psychiatry*. 2000;15:548-61.  
33  
34

35  
36 35. Plummer P, Villalobos RM, Vayda MS, Moser M, Johnson E. Feasibility of  
37 Dual-Task gait training for Community-Dwelling adults after stroke: A case series.  
38 *Stroke Res Treat*. 2014;doi: 10.1155/2014/538602.  
39  
40  
41  
42

43  
44 36. Sullivan KJ, Tilson JK, Cen SY, Rose DK, Hershberg J, Correa A, et al.  
45 Fugl-Meyer assessment of sensorimotor function after stroke: Standardized training  
46 procedure for clinical practice and clinical trials. *Stroke*. 2011;42:427-32.  
47  
48  
49

50  
51  
52 37. Kakuda W, Abo M, Shimizu M, Sasanuma J, Okamoto T, Yokoi A, et al. A  
53 multi-center study on low-frequency rTMS combined with intensive occupational  
54  
55  
56



1  
2  
3 therapy for upper limb hemiparesis in post-stroke patients. *J Neuroeng Rehabil*.  
4  
5  
6 2012;doi: 10.1186/1743-0003-9-4.  
7

8  
9 38. Blum L, Kornerbitensky N. Usefulness of the Berg Balance Scale in stroke  
10  
11 rehabilitation: A systematic review. *Phys Ther* 2008;88:559-66.  
12

13  
14 39. Ursin MH, Bergland A, Fure B, Tørstad A, Tveit A, Ihlehansen H. Balance and  
15  
16 mobility as predictors of Post-Stroke cognitive impairment. *Dement Geriatr Cogn Dis*  
17  
18 *Extra*. 2015;5:203-11.  
19  
20

21  
22 40. Duffy L, Gajree S, Langhorne P, Stott DJ, Quinn TJ. Reliability (inter-rater  
23  
24 agreement) of the Barthel Index for assessment of stroke survivors: Systematic review  
25  
26 and meta-analysis. *Stroke*. 2013;44:462-8.  
27  
28

29  
30 41. Jr WJ, Sherbourne CD. The MOS 36-item short-form health survey (SF-36). I.  
31  
32 Conceptual framework and item selection. *Medical Care*. 1992;30:473-83.  
33  
34

35  
36 42. Jin WZ, Yu HT. A study of the reliability and validity of SF-36 scale on  
37  
38 evaluating health of population. *Chin Health Resour*. 2012;15:265-7.  
39  
40

41  
42 43. Zhou XQ, Zeng YG, Yang BL, Wang AL. Effects of health qigong and baduanjin  
43  
44 on the middle and old aged people's blood lipid. *Journal of Beijing Sport*  
45  
46 *University* .2007;30:795-7.  
47  
48

49  
50 44. Zhu HM, Zhang N, Ji C. Influence of Baduanjin on mild cognitive impairment in  
51  
52 elderly diabetic patients. *Chin J Prac Nurs*. 2015;31(16):1202-5.  
53  
54

55 45. Boutron I, Moher D, Altman DG, Schulz KF, Ravaud P. Extending the CONSORT  
56

1  
2  
3  
4  
5  
6  
7  
8  
9  
10  
11  
12  
13  
14  
15  
16  
17  
18  
19  
20  
21  
22  
23  
24  
25  
26  
27  
28  
29  
30  
31  
32  
33  
34  
35  
36  
37  
38  
39  
40  
41  
42  
43  
44  
45  
46  
47  
48  
49  
50  
51  
52  
53  
54  
55  
56  
57  
58  
59  
60

statement to randomized trials of nonpharmacologic treatment: Explanation and  
elaboration. Ann Intern Med. 2008;148:295-309.

For peer review only

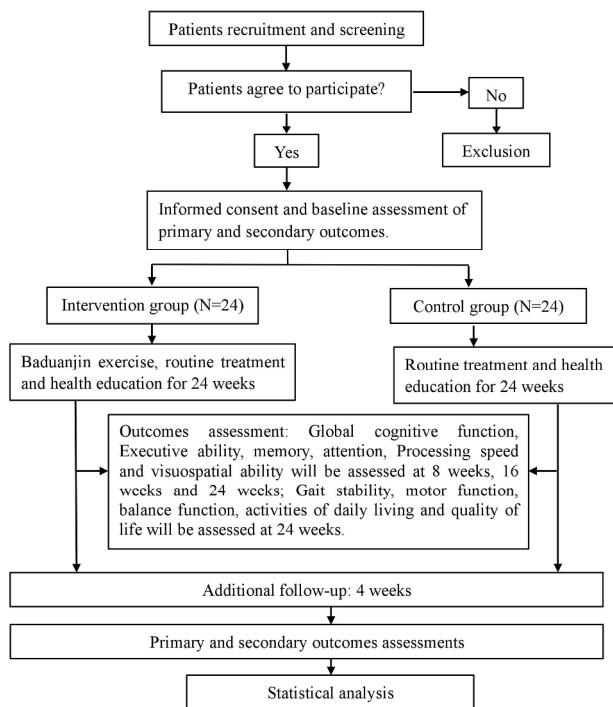

Figure 1 Flow diagram of study design

210x297mm (300 x 300 DPI)

| STUDY PERIOD                                                            |           |            |              |       |       |           |
|-------------------------------------------------------------------------|-----------|------------|--------------|-------|-------|-----------|
|                                                                         | Enrolment | Allocation | Intervention |       |       | Follow-up |
| TIMEPOINT*                                                              | - $t_1$   | 0          | $t_1$        | $t_2$ | $t_3$ | $t_4$     |
| <b>ENROLMENT:</b>                                                       |           |            |              |       |       |           |
| Eligibility screen                                                      | X         |            |              |       |       |           |
| Informed consent                                                        | X         |            |              |       |       |           |
| <b>ALLOCATION</b>                                                       |           |            |              |       |       |           |
|                                                                         |           | X          |              |       |       |           |
| <b>INTERVENTIONS:</b>                                                   |           |            |              |       |       |           |
| Intervention group<br>(Baduanjin exercise<br>training+health education) |           |            | ←————→       |       |       |           |
| Control group<br>(Health education)                                     |           |            | ←————→       |       |       |           |
| <b>ASSESSMENTS:</b>                                                     |           |            |              |       |       |           |
| Basic characteristics                                                   | X         |            |              |       |       |           |
| Global cognitive function                                               | X         |            | X            | X     | X     | X         |
| Executive ability                                                       | X         |            | X            | X     | X     | X         |
| Memory                                                                  | X         |            | X            | X     | X     | X         |
| Attention                                                               | X         |            | X            | X     | X     | X         |
| Processing speed                                                        | X         |            | X            | X     | X     | X         |
| Visuospatial ability                                                    | X         |            | X            | X     | X     | X         |
| Gait stability                                                          | X         |            |              |       | X     | X         |
| Motor Function                                                          | X         |            |              |       | X     | X         |
| Balance Function                                                        | X         |            |              |       | X     | X         |
| Activities of Daily Living                                              | X         |            |              |       | X     | X         |
| Quality of Life                                                         | X         |            |              |       | X     | X         |
| Adverse events                                                          |           |            | X            | X     | X     |           |

<Figure Legend>

\* - $t_1$  = -2(-1) weeks, 0 = Baseline,  $t_1$  = Week 8,  $t_2$  = Week 16,  $t_3$  = End of treatment Week 24,  $t_4$  = Follow Up Week 28.

Figure 2: Schedule of enrolment, interventions, and assessments

215x279mm (300 x 300 DPI)

1  
2  
3  
4  
5  
6  
7  
8  
9  
10  
11  
12  
13  
14  
15  
16  
17  
18  
19  
20  
21  
22  
23  
24  
25  
26  
27  
28  
29  
30  
31  
32  
33  
34  
35  
36  
37  
38  
39  
40  
41  
42  
43  
44  
45  
46  
47  
48  
49  
50  
51  
52  
53  
54  
55  
56  
57  
58  
59  
60



Figure 3: Ten postures of Baduanjin

297x210mm (300 x 300 DPI)



## SPIRIT 2013 Checklist: Recommended items to address in a clinical trial protocol and related documents\*

| Section/item                                              | Item No | Description                                                                                                                                                                                                                                                                              | Addressed on page number |
|-----------------------------------------------------------|---------|------------------------------------------------------------------------------------------------------------------------------------------------------------------------------------------------------------------------------------------------------------------------------------------|--------------------------|
| <b>Administrative information</b>                         |         |                                                                                                                                                                                                                                                                                          |                          |
| Title                                                     | 1       | Descriptive title identifying the study design, population, interventions, and, if applicable, trial acronym                                                                                                                                                                             | 1                        |
| Trial registration                                        | 2a      | Trial identifier and registry name. If not yet registered, name of intended registry                                                                                                                                                                                                     | 4                        |
|                                                           | 2b      | All items from the World Health Organization Trial Registration Data Set                                                                                                                                                                                                                 | 4                        |
| Protocol version                                          | 3       | Date and version identifier                                                                                                                                                                                                                                                              | 4                        |
| Funding                                                   | 4       | Sources and types of financial, material, and other support                                                                                                                                                                                                                              | 21                       |
| Roles and responsibilities                                | 5a      | Names, affiliations, and roles of protocol contributors                                                                                                                                                                                                                                  | 1 & 21                   |
|                                                           | 5b      | Name and contact information for the trial sponsor                                                                                                                                                                                                                                       | 21                       |
|                                                           | 5c      | Role of study sponsor and funders, if any, in study design; collection, management, analysis, and interpretation of data; writing of the report; and the decision to submit the report for publication, including whether they will have ultimate authority over any of these activities | 21                       |
|                                                           | 5d      | Composition, roles, and responsibilities of the coordinating centre, steering committee, endpoint adjudication committee, data management team, and other individuals or groups overseeing the trial, if applicable (see Item 21a for data monitoring committee)                         | 18                       |
| <b>Introduction</b>                                       |         |                                                                                                                                                                                                                                                                                          |                          |
| Background and rationale                                  | 6a      | Description of research question and justification for undertaking the trial, including summary of relevant studies (published and unpublished) examining benefits and harms for each intervention                                                                                       | 4-6                      |
|                                                           | 6b      | Explanation for choice of comparators                                                                                                                                                                                                                                                    | 11                       |
| Objectives                                                | 7       | Specific objectives or hypotheses                                                                                                                                                                                                                                                        | 6                        |
| Trial design                                              | 8       | Description of trial design including type of trial (eg, parallel group, crossover, factorial, single group), allocation ratio, and framework (eg, superiority, equivalence, noninferiority, exploratory)                                                                                | 6                        |
| <b>Methods: Participants, interventions, and outcomes</b> |         |                                                                                                                                                                                                                                                                                          |                          |

|    |                                                                     |     |                                                                                                                                                                                                                                                                                                                                                                                |         |
|----|---------------------------------------------------------------------|-----|--------------------------------------------------------------------------------------------------------------------------------------------------------------------------------------------------------------------------------------------------------------------------------------------------------------------------------------------------------------------------------|---------|
| 1  | Study setting                                                       | 9   | Description of study settings (eg, community clinic, academic hospital) and list of countries where data will be collected. Reference to where list of study sites can be obtained                                                                                                                                                                                             | 8       |
| 2  |                                                                     |     |                                                                                                                                                                                                                                                                                                                                                                                |         |
| 3  |                                                                     |     |                                                                                                                                                                                                                                                                                                                                                                                |         |
| 4  | Eligibility criteria                                                | 10  | Inclusion and exclusion criteria for participants. If applicable, eligibility criteria for study centres and individuals who will perform the interventions (eg, surgeons, psychotherapists)                                                                                                                                                                                   | 7-8     |
| 5  |                                                                     |     |                                                                                                                                                                                                                                                                                                                                                                                |         |
| 6  |                                                                     |     |                                                                                                                                                                                                                                                                                                                                                                                |         |
| 7  |                                                                     |     |                                                                                                                                                                                                                                                                                                                                                                                |         |
| 8  | Interventions                                                       | 11a | Interventions for each group with sufficient detail to allow replication, including how and when they will be administered                                                                                                                                                                                                                                                     | 10      |
| 9  |                                                                     |     |                                                                                                                                                                                                                                                                                                                                                                                |         |
| 10 |                                                                     |     |                                                                                                                                                                                                                                                                                                                                                                                |         |
| 11 |                                                                     | 11b | Criteria for discontinuing or modifying allocated interventions for a given trial participant (eg, drug dose change in response to harms, participant request, or improving/worsening disease)                                                                                                                                                                                 | 11      |
| 12 |                                                                     |     |                                                                                                                                                                                                                                                                                                                                                                                |         |
| 13 |                                                                     |     |                                                                                                                                                                                                                                                                                                                                                                                |         |
| 14 |                                                                     | 11c | Strategies to improve adherence to intervention protocols, and any procedures for monitoring adherence (eg, drug tablet return, laboratory tests)                                                                                                                                                                                                                              | 12      |
| 15 |                                                                     |     |                                                                                                                                                                                                                                                                                                                                                                                |         |
| 16 |                                                                     |     |                                                                                                                                                                                                                                                                                                                                                                                |         |
| 17 |                                                                     |     |                                                                                                                                                                                                                                                                                                                                                                                |         |
| 18 |                                                                     | 11d | Relevant concomitant care and interventions that are permitted or prohibited during the trial                                                                                                                                                                                                                                                                                  | 10-11   |
| 19 |                                                                     |     |                                                                                                                                                                                                                                                                                                                                                                                |         |
| 20 |                                                                     |     |                                                                                                                                                                                                                                                                                                                                                                                |         |
| 21 | Outcomes                                                            | 12  | Primary, secondary, and other outcomes, including the specific measurement variable (eg, systolic blood pressure), analysis metric (eg, change from baseline, final value, time to event), method of aggregation (eg, median, proportion), and time point for each outcome. Explanation of the clinical relevance of chosen efficacy and harm outcomes is strongly recommended | 13-16   |
| 22 |                                                                     |     |                                                                                                                                                                                                                                                                                                                                                                                |         |
| 23 |                                                                     |     |                                                                                                                                                                                                                                                                                                                                                                                |         |
| 24 |                                                                     |     |                                                                                                                                                                                                                                                                                                                                                                                |         |
| 25 |                                                                     |     |                                                                                                                                                                                                                                                                                                                                                                                |         |
| 26 |                                                                     |     |                                                                                                                                                                                                                                                                                                                                                                                |         |
| 27 | Participant timeline                                                | 13  | Time schedule of enrolment, interventions (including any run-ins and washouts), assessments, and visits for participants. A schematic diagram is highly recommended (see Figure)                                                                                                                                                                                               | Figure2 |
| 28 |                                                                     |     |                                                                                                                                                                                                                                                                                                                                                                                |         |
| 29 |                                                                     |     |                                                                                                                                                                                                                                                                                                                                                                                |         |
| 30 |                                                                     |     |                                                                                                                                                                                                                                                                                                                                                                                |         |
| 31 | Sample size                                                         | 14  | Estimated number of participants needed to achieve study objectives and how it was determined, including clinical and statistical assumptions supporting any sample size calculations                                                                                                                                                                                          | 7       |
| 32 |                                                                     |     |                                                                                                                                                                                                                                                                                                                                                                                |         |
| 33 |                                                                     |     |                                                                                                                                                                                                                                                                                                                                                                                |         |
| 34 | Recruitment                                                         | 15  | Strategies for achieving adequate participant enrolment to reach target sample size                                                                                                                                                                                                                                                                                            | 9       |
| 35 |                                                                     |     |                                                                                                                                                                                                                                                                                                                                                                                |         |
| 36 |                                                                     |     |                                                                                                                                                                                                                                                                                                                                                                                |         |
| 37 | <b>Methods: Assignment of interventions (for controlled trials)</b> |     |                                                                                                                                                                                                                                                                                                                                                                                |         |
| 38 | Allocation:                                                         |     |                                                                                                                                                                                                                                                                                                                                                                                |         |
| 39 | Allocation:                                                         |     |                                                                                                                                                                                                                                                                                                                                                                                |         |
| 40 | Sequence generation                                                 | 16a | Method of generating the allocation sequence (eg, computer-generated random numbers), and list of any factors for stratification. To reduce predictability of a random sequence, details of any planned restriction (eg, blocking) should be provided in a separate document that is unavailable to those who enrol participants or assign interventions                       | 9       |
| 41 |                                                                     |     |                                                                                                                                                                                                                                                                                                                                                                                |         |
| 42 |                                                                     |     |                                                                                                                                                                                                                                                                                                                                                                                |         |
| 43 |                                                                     |     |                                                                                                                                                                                                                                                                                                                                                                                |         |
| 44 |                                                                     |     |                                                                                                                                                                                                                                                                                                                                                                                |         |
| 45 |                                                                     |     |                                                                                                                                                                                                                                                                                                                                                                                |         |
| 46 |                                                                     |     |                                                                                                                                                                                                                                                                                                                                                                                |         |
| 47 | Allocation concealment mechanism                                    | 16b | Mechanism of implementing the allocation sequence (eg, central telephone; sequentially numbered, opaque, sealed envelopes), describing any steps to conceal the sequence until interventions are assigned                                                                                                                                                                      | 9-10    |
| 48 |                                                                     |     |                                                                                                                                                                                                                                                                                                                                                                                |         |
| 49 |                                                                     |     |                                                                                                                                                                                                                                                                                                                                                                                |         |
| 50 |                                                                     |     |                                                                                                                                                                                                                                                                                                                                                                                |         |
| 51 |                                                                     |     |                                                                                                                                                                                                                                                                                                                                                                                |         |
| 52 | Implementation                                                      | 16c | Who will generate the allocation sequence, who will enrol participants, and who will assign participants to interventions                                                                                                                                                                                                                                                      | 9-10    |
| 53 |                                                                     |     |                                                                                                                                                                                                                                                                                                                                                                                |         |
| 54 |                                                                     |     |                                                                                                                                                                                                                                                                                                                                                                                |         |
| 55 | Blinding (masking)                                                  | 17a | Who will be blinded after assignment to interventions (eg, trial participants, care providers, outcome assessors, data analysts), and how                                                                                                                                                                                                                                      | 10      |
| 56 |                                                                     |     |                                                                                                                                                                                                                                                                                                                                                                                |         |
| 57 |                                                                     |     |                                                                                                                                                                                                                                                                                                                                                                                |         |

|    |                                                           |     |                                                                                                                                                                                                                                                                                                                                                                                                              |       |
|----|-----------------------------------------------------------|-----|--------------------------------------------------------------------------------------------------------------------------------------------------------------------------------------------------------------------------------------------------------------------------------------------------------------------------------------------------------------------------------------------------------------|-------|
| 1  |                                                           | 17b | If blinded, circumstances under which unblinding is permissible, and procedure for revealing a participant's allocated intervention during the trial                                                                                                                                                                                                                                                         | 10    |
| 2  |                                                           |     |                                                                                                                                                                                                                                                                                                                                                                                                              |       |
| 3  |                                                           |     |                                                                                                                                                                                                                                                                                                                                                                                                              |       |
| 4  |                                                           |     |                                                                                                                                                                                                                                                                                                                                                                                                              |       |
| 5  | <b>Methods: Data collection, management, and analysis</b> |     |                                                                                                                                                                                                                                                                                                                                                                                                              |       |
| 6  | Data collection methods                                   | 18a | Plans for assessment and collection of outcome, baseline, and other trial data, including any related processes to promote data quality (eg, duplicate measurements, training of assessors) and a description of study instruments (eg, questionnaires, laboratory tests) along with their reliability and validity, if known. Reference to where data collection forms can be found, if not in the protocol | 16    |
| 7  |                                                           |     |                                                                                                                                                                                                                                                                                                                                                                                                              |       |
| 8  |                                                           |     |                                                                                                                                                                                                                                                                                                                                                                                                              |       |
| 9  |                                                           |     |                                                                                                                                                                                                                                                                                                                                                                                                              |       |
| 10 |                                                           |     |                                                                                                                                                                                                                                                                                                                                                                                                              |       |
| 11 |                                                           |     |                                                                                                                                                                                                                                                                                                                                                                                                              |       |
| 12 |                                                           |     |                                                                                                                                                                                                                                                                                                                                                                                                              |       |
| 13 |                                                           |     |                                                                                                                                                                                                                                                                                                                                                                                                              |       |
| 14 |                                                           | 18b | Plans to promote participant retention and complete follow-up, including list of any outcome data to be collected for participants who discontinue or deviate from intervention protocols                                                                                                                                                                                                                    | 12&16 |
| 15 |                                                           |     |                                                                                                                                                                                                                                                                                                                                                                                                              |       |
| 16 |                                                           |     |                                                                                                                                                                                                                                                                                                                                                                                                              |       |
| 17 | Data management                                           | 19  | Plans for data entry, coding, security, and storage, including any related processes to promote data quality (eg, double data entry; range checks for data values). Reference to where details of data management procedures can be found, if not in the protocol                                                                                                                                            | 16    |
| 18 |                                                           |     |                                                                                                                                                                                                                                                                                                                                                                                                              |       |
| 19 |                                                           |     |                                                                                                                                                                                                                                                                                                                                                                                                              |       |
| 20 |                                                           |     |                                                                                                                                                                                                                                                                                                                                                                                                              |       |
| 21 |                                                           |     |                                                                                                                                                                                                                                                                                                                                                                                                              |       |
| 22 | Statistical methods                                       | 20a | Statistical methods for analysing primary and secondary outcomes. Reference to where other details of the statistical analysis plan can be found, if not in the protocol                                                                                                                                                                                                                                     | 17    |
| 23 |                                                           |     |                                                                                                                                                                                                                                                                                                                                                                                                              |       |
| 24 |                                                           |     |                                                                                                                                                                                                                                                                                                                                                                                                              |       |
| 25 |                                                           |     |                                                                                                                                                                                                                                                                                                                                                                                                              |       |
| 26 |                                                           | 20b | Methods for any additional analyses (eg, subgroup and adjusted analyses)                                                                                                                                                                                                                                                                                                                                     | 17    |
| 27 |                                                           |     |                                                                                                                                                                                                                                                                                                                                                                                                              |       |
| 28 |                                                           |     |                                                                                                                                                                                                                                                                                                                                                                                                              |       |
| 29 |                                                           | 20c | Definition of analysis population relating to protocol non-adherence (eg, as randomised analysis), and any statistical methods to handle missing data (eg, multiple imputation)                                                                                                                                                                                                                              | 17    |
| 30 |                                                           |     |                                                                                                                                                                                                                                                                                                                                                                                                              |       |
| 31 |                                                           |     |                                                                                                                                                                                                                                                                                                                                                                                                              |       |
| 32 | <b>Methods: Monitoring</b>                                |     |                                                                                                                                                                                                                                                                                                                                                                                                              |       |
| 33 |                                                           |     |                                                                                                                                                                                                                                                                                                                                                                                                              |       |
| 34 | Data monitoring                                           | 21a | Composition of data monitoring committee (DMC); summary of its role and reporting structure; statement of whether it is independent from the sponsor and competing interests; and reference to where further details about its charter can be found, if not in the protocol. Alternatively, an explanation of why a DMC is not needed                                                                        | 16-17 |
| 35 |                                                           |     |                                                                                                                                                                                                                                                                                                                                                                                                              |       |
| 36 |                                                           |     |                                                                                                                                                                                                                                                                                                                                                                                                              |       |
| 37 |                                                           |     |                                                                                                                                                                                                                                                                                                                                                                                                              |       |
| 38 |                                                           |     |                                                                                                                                                                                                                                                                                                                                                                                                              |       |
| 39 |                                                           |     |                                                                                                                                                                                                                                                                                                                                                                                                              |       |
| 40 |                                                           | 21b | Description of any interim analyses and stopping guidelines, including who will have access to these interim results and make the final decision to terminate the trial                                                                                                                                                                                                                                      | 9     |
| 41 |                                                           |     |                                                                                                                                                                                                                                                                                                                                                                                                              |       |
| 42 |                                                           |     |                                                                                                                                                                                                                                                                                                                                                                                                              |       |
| 43 |                                                           |     |                                                                                                                                                                                                                                                                                                                                                                                                              |       |
| 44 | Harms                                                     | 22  | Plans for collecting, assessing, reporting, and managing solicited and spontaneously reported adverse events and other unintended effects of trial interventions or trial conduct                                                                                                                                                                                                                            | 16    |
| 45 |                                                           |     |                                                                                                                                                                                                                                                                                                                                                                                                              |       |
| 46 |                                                           |     |                                                                                                                                                                                                                                                                                                                                                                                                              |       |
| 47 | Auditing                                                  | 23  | Frequency and procedures for auditing trial conduct, if any, and whether the process will be independent from investigators and the sponsor                                                                                                                                                                                                                                                                  | 16    |
| 48 |                                                           |     |                                                                                                                                                                                                                                                                                                                                                                                                              |       |
| 49 |                                                           |     |                                                                                                                                                                                                                                                                                                                                                                                                              |       |
| 50 |                                                           |     |                                                                                                                                                                                                                                                                                                                                                                                                              |       |
| 51 | <b>Ethics and dissemination</b>                           |     |                                                                                                                                                                                                                                                                                                                                                                                                              |       |
| 52 |                                                           |     |                                                                                                                                                                                                                                                                                                                                                                                                              |       |
| 53 | Research ethics approval                                  | 24  | Plans for seeking research ethics committee/institutional review board (REC/IRB) approval                                                                                                                                                                                                                                                                                                                    | 17-18 |
| 54 |                                                           |     |                                                                                                                                                                                                                                                                                                                                                                                                              |       |
| 55 |                                                           |     |                                                                                                                                                                                                                                                                                                                                                                                                              |       |
| 56 |                                                           |     |                                                                                                                                                                                                                                                                                                                                                                                                              |       |
| 57 |                                                           |     |                                                                                                                                                                                                                                                                                                                                                                                                              |       |
| 58 |                                                           |     |                                                                                                                                                                                                                                                                                                                                                                                                              |       |
| 59 |                                                           |     |                                                                                                                                                                                                                                                                                                                                                                                                              |       |
| 60 |                                                           |     |                                                                                                                                                                                                                                                                                                                                                                                                              |       |



|    |                               |     |                                                                                                                                                                                                                                                                                     |                                             |
|----|-------------------------------|-----|-------------------------------------------------------------------------------------------------------------------------------------------------------------------------------------------------------------------------------------------------------------------------------------|---------------------------------------------|
| 1  | Protocol amendments           | 25  | Plans for communicating important protocol modifications (eg, changes to eligibility criteria, outcomes, analyses) to relevant parties (eg, investigators, REC/IRBs, trial participants, trial registries, journals, regulators)                                                    | 18                                          |
| 2  |                               |     |                                                                                                                                                                                                                                                                                     |                                             |
| 3  |                               |     |                                                                                                                                                                                                                                                                                     |                                             |
| 4  |                               |     |                                                                                                                                                                                                                                                                                     |                                             |
| 5  | Consent or assent             | 26a | Who will obtain informed consent or assent from potential trial participants or authorised surrogates, and how (see Item 32)                                                                                                                                                        | 18                                          |
| 6  |                               |     |                                                                                                                                                                                                                                                                                     |                                             |
| 7  |                               |     |                                                                                                                                                                                                                                                                                     |                                             |
| 8  |                               | 26b | Additional consent provisions for collection and use of participant data and biological specimens in ancillary studies, if applicable                                                                                                                                               | 9 & 16                                      |
| 9  |                               |     |                                                                                                                                                                                                                                                                                     |                                             |
| 10 |                               |     |                                                                                                                                                                                                                                                                                     |                                             |
| 11 | Confidentiality               | 27  | How personal information about potential and enrolled participants will be collected, shared, and maintained in order to protect confidentiality before, during, and after the trial                                                                                                | 16-18                                       |
| 12 |                               |     |                                                                                                                                                                                                                                                                                     |                                             |
| 13 |                               |     |                                                                                                                                                                                                                                                                                     |                                             |
| 14 |                               |     |                                                                                                                                                                                                                                                                                     |                                             |
| 15 | Declaration of interests      | 28  | Financial and other competing interests for principal investigators for the overall trial and each study site                                                                                                                                                                       | 22                                          |
| 16 |                               |     |                                                                                                                                                                                                                                                                                     |                                             |
| 17 |                               |     |                                                                                                                                                                                                                                                                                     |                                             |
| 18 | Access to data                | 29  | Statement of who will have access to the final trial dataset, and disclosure of contractual agreements that limit such access for investigators                                                                                                                                     | 16 & 18                                     |
| 19 |                               |     |                                                                                                                                                                                                                                                                                     |                                             |
| 20 |                               |     |                                                                                                                                                                                                                                                                                     |                                             |
| 21 | Ancillary and post-trial care | 30  | Provisions, if any, for ancillary and post-trial care, and for compensation to those who suffer harm from trial participation                                                                                                                                                       | Available in the informed consent materials |
| 22 |                               |     |                                                                                                                                                                                                                                                                                     |                                             |
| 23 |                               |     |                                                                                                                                                                                                                                                                                     |                                             |
| 24 |                               |     |                                                                                                                                                                                                                                                                                     |                                             |
| 25 | Dissemination policy          | 31a | Plans for investigators and sponsor to communicate trial results to participants, healthcare professionals, the public, and other relevant groups (eg, via publication, reporting in results databases, or other data sharing arrangements), including any publication restrictions | 18                                          |
| 26 |                               |     |                                                                                                                                                                                                                                                                                     |                                             |
| 27 |                               |     |                                                                                                                                                                                                                                                                                     |                                             |
| 28 |                               |     |                                                                                                                                                                                                                                                                                     |                                             |
| 29 |                               |     |                                                                                                                                                                                                                                                                                     |                                             |
| 30 |                               |     |                                                                                                                                                                                                                                                                                     |                                             |
| 31 |                               | 31b | Authorship eligibility guidelines and any intended use of professional writers                                                                                                                                                                                                      | 18                                          |
| 32 |                               |     |                                                                                                                                                                                                                                                                                     |                                             |
| 33 |                               |     |                                                                                                                                                                                                                                                                                     |                                             |
| 34 |                               | 31c | Plans, if any, for granting public access to the full protocol, participant-level dataset, and statistical code                                                                                                                                                                     | 16                                          |
| 35 |                               |     |                                                                                                                                                                                                                                                                                     |                                             |
| 36 | <b>Appendices</b>             |     |                                                                                                                                                                                                                                                                                     |                                             |
| 37 |                               |     |                                                                                                                                                                                                                                                                                     |                                             |
| 38 | Informed consent materials    | 32  | Model consent form and other related documentation given to participants and authorised surrogates                                                                                                                                                                                  | Available in Chinese version                |
| 39 |                               |     |                                                                                                                                                                                                                                                                                     |                                             |
| 40 |                               |     |                                                                                                                                                                                                                                                                                     |                                             |
| 41 | Biological specimens          | 33  | Plans for collection, laboratory evaluation, and storage of biological specimens for genetic or molecular analysis in the current trial and for future use in ancillary studies, if applicable                                                                                      | Not applicable                              |
| 42 |                               |     |                                                                                                                                                                                                                                                                                     |                                             |
| 43 |                               |     |                                                                                                                                                                                                                                                                                     |                                             |

\*It is strongly recommended that this checklist be read in conjunction with the SPIRIT 2013 Explanation & Elaboration for important clarification on the items. Amendments to the protocol should be tracked and dated. The SPIRIT checklist is copyrighted by the SPIRIT Group under the Creative Commons “[Attribution-NonCommercial-NoDerivs 3.0 Unported](https://creativecommons.org/licenses/by-nc-nd/3.0/)” license.
